# Supplementary material for: One-pot synthesis of 1,3-oxazin-4-ones through an Ir-catalyzed mild formal condensation reaction of secondary amides with acyl chlorides
Source: Royal Society of Chemistry journal article supplement (doi:10.1039/d3qo00092c), 2023-01-01
Supplement: d3qo00092c1.pdf [file d3qo00092c1.pdf]

## One-Pot Synthesis of 1,3-Oxazin-4-ones through an Ir-Catalyzed Mild Formal Condensation Reaction of Secondary Amides with Acyl Chlorides

Si-Jia Yu,<sup>†</sup> Jie Li,<sup>†</sup> Jian-Liang Ye,<sup>\*</sup> and Pei-Qiang Huang<sup>\*</sup>

*Fujian Provincial Key Laboratory of Chemical Biology, College of Chemistry and  
Chemical Engineering, Xiamen University, Xiamen 361005, P. R. China*

### Table of Contents

|                                                                                                                          |     |
|--------------------------------------------------------------------------------------------------------------------------|-----|
| 1. General Information                                                                                                   | S2  |
| 2. The Structures of Amides Used                                                                                         | S3  |
| 3. Experiment Details                                                                                                    | S4  |
| 3.1 General Procedure A for Synthesis of 2,3,6,7-Tetrahydrocyclopenta[ <i>e</i> ]-1,3-oxazin-4-one <b>7</b> .            |     |
| 3.2 General Procedure B for Synthesis of 2,3,5,6,7,8-Hexahydro-4 <i>H</i> -benzo[ <i>e</i> ]-1,3-oxazin-4-one <b>9</b> . |     |
| 3.3 General Procedure C for Synthesis of 2,3-Dihydro-4 <i>H</i> -1,3-oxazin-4-one <b>13</b> .                            |     |
| 4. Preparation and Characterization of 1,3-Oxazin-4-ones                                                                 | S6  |
| 5. Copies of NMR Spectra of Compounds <b>7a-7af</b>                                                                      | S33 |
| 6. Copies of NMR Spectra of Compounds <b>9a-9l</b>                                                                       | S65 |
| 7. Copies of NMR Spectra of Compounds <b>13a, 13b</b>                                                                    | S77 |
| 8. X-Ray Structures of Compound <b>7a</b>                                                                                | S79 |
| 9. X-Ray Structures of Compound <b>7c</b>                                                                                | S80 |
| 10. X-Ray Structures of Compound <b>9a</b>                                                                               | S81 |
| 11. X-Ray Structures of Compound <b>9b</b>                                                                               | S82 |

## 1. General Information

Melting points were determined by a Switzerland Büchi M-560 automatic melting point apparatus. Infrared spectra were measured with a Nicolet Avatar 330 FT-IR spectrometer using film KBr pellet techniques.  $^1\text{H}$  NMR and  $^{13}\text{C}$  NMR spectra were recorded on 400 MHz spectrometer with  $\text{CDCl}_3$  as solvent. Chemical shifts ( $\delta$ ) are reported in ppm and respectively referenced to either the internal standard  $\text{Me}_4\text{Si}$  or solvent signals ( $\text{Me}_4\text{Si}$  at 0 ppm for  $^1\text{H}$  NMR and  $\text{CDCl}_3$  at 77.0 ppm for  $^{13}\text{C}$  NMR). HRMS spectra were recorded with Micromass QTOF2 Quadrupole/Time-of-Flight Tandem mass spectrometer using electron spray ionization. Unless otherwise stated, reactions were performed in oven-dried glassware under a nitrogen atmosphere using standard Schlenk techniques. Flash column chromatography was performed with silica gel (200-300 mesh), eluting with AcOEt / Petroleum ether (EA / PE). Toluene was distilled over sodium under  $\text{N}_2$ . All other commercially available compounds were used as received.

**Table S1. The structures of amides used**

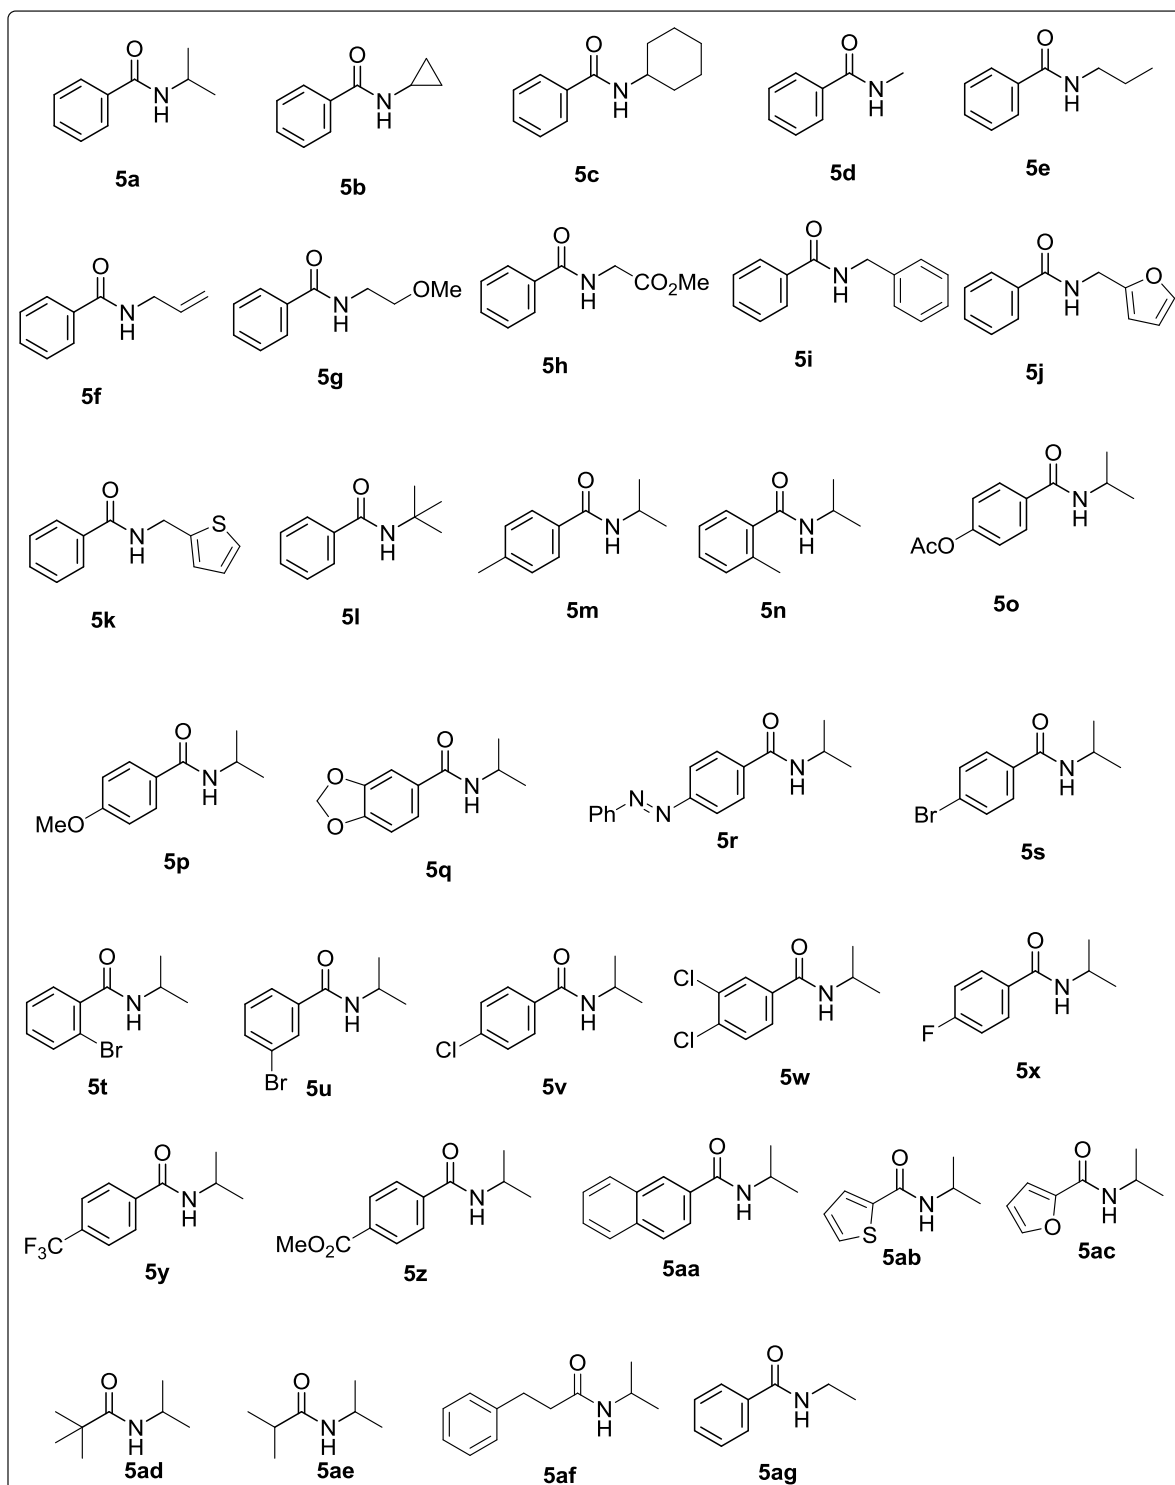

### 3. Experiment Details

#### 3.1 General Procedure A for Synthesis of 2,3,6,7-tetrahydrocyclopenta[*e*]-1,3-oxazin-4-one **7**.

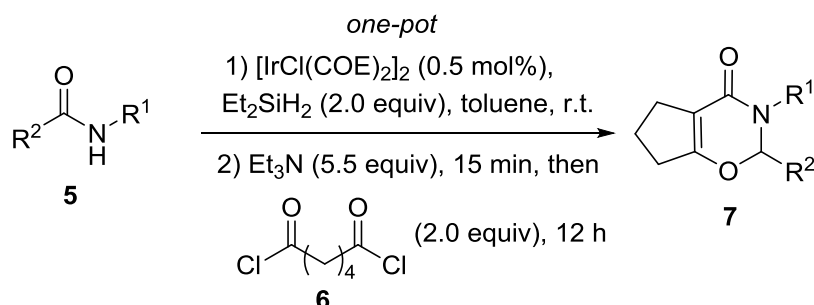

To a solution of secondary amide **5** (0.50 mmol, 1.0 equiv) and [IrCl(COE)<sub>2</sub>]<sub>2</sub> (2.2 mg, 0.5 mol%, weighted in the glove box) in toluene (2.5 mL, 0.2 M) was added Et<sub>2</sub>SiH<sub>2</sub> (130 μL, 1.0 mmol, 2.0 equiv) at room temperature. The mixture was stirred at the same temperature until complete consumption of amide (monitored by TLC). Then Et<sub>3</sub>N (382 μL, 2.75 mmol, 5.5 equiv) was added. After being stirred for 15 min, to the reaction mixture a solution of adipoyl chloride **6** (146 μL, 1.0 mmol, 2.0 equiv) in toluene (1.0 mL) was added dropwise and stirred for 12 h at room temperature. The resulted mixture was concentrated under reduced pressure. The residue was purified by flash chromatography on silica gel (elution AcOEt / Petroleum ether) to provide the corresponding 1,3-oxazin-4-ones **7**.

#### 3.2 General Procedure B for Synthesis of 2,3,5,6,7,8-hexahydro-4*H*-benzo[*e*]-1,3-oxazin-4-one **9**.

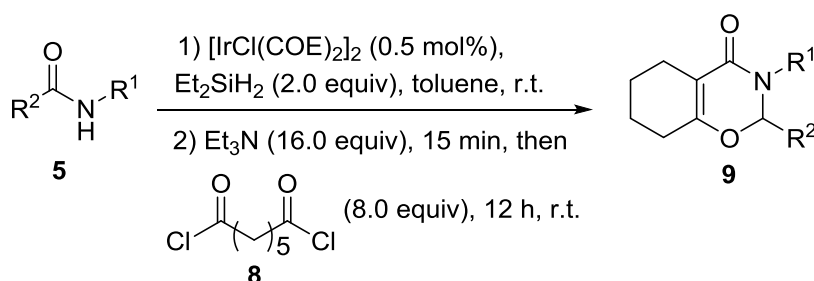

To a solution of secondary amide **5** (0.50 mmol, 1.0 equiv.) and [IrCl(COE)<sub>2</sub>]<sub>2</sub> (2.2 mg, 0.5 mol%, weighted in the glove box) in toluene (2.5 mL, 0.2 M) was added Et<sub>2</sub>SiH<sub>2</sub> (130 μL, 1.0 mmol, 2.0 equiv) at room temperature. The mixture was stirred at the

same temperature until complete consumption of amide (monitored by TLC). Then Et<sub>3</sub>N (1.1 mL, 8.0 mmol, 16.0 equiv) was added. After being stirred for 15 min, to the reaction mixture a solution of pimeloyl chloride **8** (654 μL, 4.0 mmol, 8.0 equiv) in toluene (4.0 mL) was added dropwise and stirred for 12 h at room temperature. The resulted mixture was concentrated under reduced pressure. The residue was purified by flash chromatography on silica gel (elution: AcOEt / Petroleum ether) to provide the corresponding 1,3-oxazin-4-ones **9**.

### 3.3 General Procedure B for Synthesis of 2,3-dihydro-4*H*-1,3-oxazin-4-one **13**.

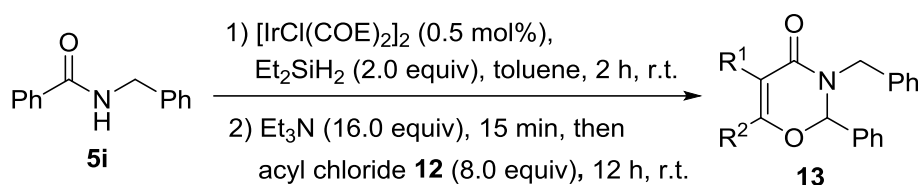

To a solution of secondary amide **5i** (0.50 mmol, 1.0 equiv.) and [IrCl(COE)<sub>2</sub>]<sub>2</sub> (2.2 mg, 0.5 mol%, weighted in the glove box) in toluene (2.5 mL, 0.2 M) was added Et<sub>2</sub>SiH<sub>2</sub> (130 μL, 1.0 mmol, 2.0 equiv) at room temperature. The mixture was stirred at the same temperature until complete consumption of amide (monitored by TLC). Then Et<sub>3</sub>N (1.1 mL, 8.0 mmol, 16.0 equiv) was added. After being stirred for 15 min, to the reaction mixture a solution of acyl chloride **12** (4.0 mmol, 8.0 equiv) in toluene (4.0 mL) was added dropwise and stirred for 12 h at room temperature. The resulted mixture was concentrated under reduced pressure. The residue was purified by flash chromatography on silica gel (elution: AcOEt / Petroleum ether) to provide the corresponding 1,3-oxazin-4-ones **13**.

## 4. Preparation and Characterization of 1,3-oxazin-4-ones

### 3-Isopropyl-2-phenyl-2,3,6,7-tetrahydrocyclopenta[*e*][1,3]oxazin-4(5*H*)-one (7a)

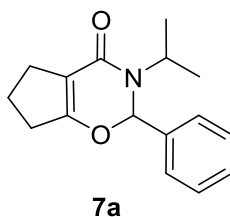

Following the general procedure A, the reaction of secondary amide **5a** (82 mg, 0.50 mmol) gave, after FC (eluent: EA / PE = 1: 3), oxazinone **7a** (110 mg, yield: 86%) as a white solid; Mp 95-98 °C; IR (film)  $\nu_{\text{max}}$ : 2967, 2870, 1660, 1439, 1311, 1204, 1041, 912, 756  $\text{cm}^{-1}$ ;  $^1\text{H}$  NMR (400 MHz,  $\text{CDCl}_3$ ):  $\delta$  7.48-7.40 (m, 2H), 7.39-7.31 (m, 3H), 6.37 (s, 1H), 4.86 (septet,  $J = 6.9$  Hz, 1H), 2.67-2.53 (m, 1H), 2.51-2.30 (m, 2H), 2.25-2.12 (m, 1H), 1.95-1.81 (m, 1H), 1.78-1.67 (m, 1H), 1.29 (d,  $J = 6.9$  Hz, 3H), 1.05 (d,  $J = 6.9$  Hz, 3H) ppm;  $^{13}\text{C}$  NMR (100 MHz,  $\text{CDCl}_3$ ):  $\delta$  165.8, 162.2, 138.5, 128.7, 128.0 (2C), 126.9 (2C), 111.0, 85.0, 43.8, 31.2, 25.7, 21.3, 20.5, 19.4 ppm; HRMS (ESI)  $m/z$ :  $[\text{M} + \text{H}]^+$  calcd for  $\text{C}_{16}\text{H}_{20}\text{NO}_2$  258.1489, found 258.1484.

### 3-Cyclopropyl-2-phenyl-2,3,6,7-tetrahydrocyclopenta[*e*][1,3]oxazin-4(5*H*)-one (7b)

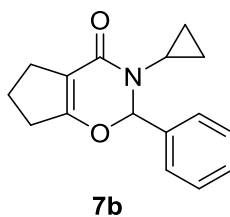

Following the general procedure A, the reaction of secondary amide **5b** (81 mg, 0.50 mmol) gave, after FC (eluent: EA / PE = 1: 3), oxazinone **7b** (116 mg, yield: 91%) as a white solid; Mp 106-109 °C; IR (film)  $\nu_{\text{max}}$ : 2960, 2869, 1669, 1455, 1429, 1364, 1299, 1235, 1109, 1028, 941, 759, 698  $\text{cm}^{-1}$ ;  $^1\text{H}$  NMR (400 MHz,  $\text{CDCl}_3$ ):  $\delta$  7.38 (s, 5H), 6.29 (s, 1H), 2.64-2.51 (m, 2H), 2.50-2.34 (m, 2H), 2.32-2.18 (m, 1H), 1.96-1.83 (m, 1H), 1.82-1.70 (m, 1H), 1.05-0.93 (m, 1H), 0.87-0.78 (m, 1H), 0.77-0.64 (m, 2H) ppm;  $^{13}\text{C}$  NMR (100 MHz,  $\text{CDCl}_3$ ):  $\delta$  166.2, 163.9, 137.4, 128.9, 128.3 (2C), 126.5 (2C), 109.9, 90.4, 31.3, 26.9, 25.6, 19.5, 9.0, 6.3 ppm; HRMS (ESI)  $m/z$ :  $[\text{M} + \text{Na}]^+$

cacl'd for C<sub>16</sub>H<sub>17</sub>NO<sub>2</sub>Na 278.1151, found 278.1150.

**3-Cyclohexyl-2-phenyl-2,3,6,7-tetrahydrocyclopenta[e][1,3]oxazin-4(5H)-one (7c)**

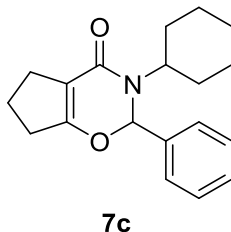

Following the general procedure A, the reaction of secondary amide **5c** (102 mg, 0.50 mmol) gave, after FC (eluent: EA / PE = 1: 3), oxazinone **7c** (144 mg, yield: 97%) as a white solid; Mp 131-134 °C; IR (film)  $\nu_{\max}$ : 2930, 2855, 1660, 1533, 1439, 1310, 1216, 1129, 917, 894, 739, 698 cm<sup>-1</sup>; <sup>1</sup>H NMR (400 MHz, CDCl<sub>3</sub>):  $\delta$  7.47-7.40 (m, 2H), 7.38-7.30 (m, 3H), 6.39 (s, 1H), 4.56-4.43 (m, 1H), 2.68-2.54 (m, 1H), 2.52-2.29 (m, 2H), 2.26-2.11 (m, 1H), 1.91-1.30 (m, 10H), 1.13-0.94 (m, 2H) ppm; <sup>13</sup>C NMR (100 MHz, CDCl<sub>3</sub>):  $\delta$  165.7, 162.1, 138.7, 128.7, 127.0 (2C), 126.9 (2C), 111.1, 85.3, 51.6, 31.5, 31.3, 31.2, 25.8, 25.7, 25.6, 25.3, 19.4 ppm; HRMS (ESI)  $m/z$ : [M + Na]<sup>+</sup> cacl'd for C<sub>19</sub>H<sub>23</sub>NO<sub>2</sub>Na 320.1621, found 320.1616.

**3-Methyl-2-phenyl-2,3,6,7-tetrahydrocyclopenta[e][1,3]oxazin-4(5H)-one (7d)**

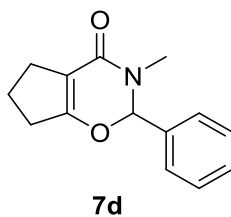

Following the general procedure, the reaction of secondary amide **5d** (68 mg, 0.50 mmol) gave, after FC (eluent: EA / PE = 1: 3), oxazinone **7d** (86 mg, yield: 75%) as a white solid; Mp 117-120 °C; IR (film)  $\nu_{\max}$ : 2923, 2867, 1667, 1440, 1405, 1317, 1303, 1212, 1075, 758, 740, 699 cm<sup>-1</sup>; <sup>1</sup>H NMR (400 MHz, CDCl<sub>3</sub>):  $\delta$  7.42 (s, 5H), 6.15 (s, 1H), 2.82 (s, 3H), 2.64-2.48 (m, 3H), 2.46-2.35 (m, 1H), 1.99-1.87 (m, 2H) ppm; <sup>13</sup>C NMR (100 MHz, CDCl<sub>3</sub>):  $\delta$  167.4, 163.6, 136.0, 129.6, 128.7 (2C), 127.2 (2C), 109.7, 91.5, 31.3, 30.4, 26.0, 19.7 ppm; HRMS (ESI)  $m/z$ : [M + Na]<sup>+</sup> cacl'd for C<sub>14</sub>H<sub>15</sub>NO<sub>2</sub>Na 252.0995, found 252.0991.

**2-Phenyl-3-propyl-2,3,6,7-tetrahydrocyclopenta[e][1,3]oxazin-4(5H)-one (7e)**

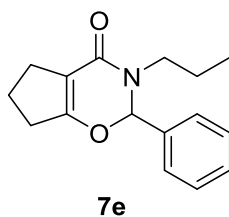

Following the general procedure A, the reaction of secondary amide **5e** (82 mg, 0.50 mmol) gave, after FC (eluent: EA / PE = 1: 3), oxazinone **7e** (96 mg, yield: 74%) as a white solid; Mp 95-97 °C; IR (film)  $\nu_{\max}$ : 2964, 2871, 1664, 1464, 1447, 1425, 1299, 1218, 1093, 736  $\text{cm}^{-1}$ ;  $^1\text{H}$  NMR (400 MHz,  $\text{CDCl}_3$ ):  $\delta$  7.37 (s, 5H), 6.21 (s, 1H), 3.95-3.72 (m, 1H), 2.86-2.71 (m, 1H), 2.67-2.55 (m, 1H), 2.53-2.39 (m, 2H), 2.37-2.24 (m, 1H), 1.96-1.76 (m, 2H), 1.62-1.46 (m, 2H), 0.84 (t,  $J = 7.4$  Hz, 3H) ppm;  $^{13}\text{C}$  NMR (100 MHz,  $\text{CDCl}_3$ ):  $\delta$  166.7, 162.9, 136.6, 129.3, 128.4 (2C), 127.0 (2C), 110.1, 89.8, 45.2, 31.3, 25.8, 21.7, 19.6, 11.2 ppm; HRMS (ESI)  $m/z$ :  $[\text{M} + \text{Na}]^+$  cacl'd for  $\text{C}_{16}\text{H}_{19}\text{NO}_2\text{Na}$  280.1308, found 280.1303.

**3-Allyl-2-phenyl-2,3,6,7-tetrahydrocyclopenta[e][1,3]oxazin-4(5H)-one (7f)**

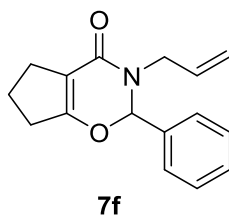

Following the general procedure A, the reaction of secondary amide **5f** (81 mg, 0.50 mmol) gave, after FC (eluent: EA / PE = 1: 3), oxazinone **7f** (87 mg, yield: 68%) as a white solid; Mp 86-89 °C; IR (film)  $\nu_{\max}$ : 2956, 2839, 1664, 1444, 1216, 1080, 922, 741, 698  $\text{cm}^{-1}$ ;  $^1\text{H}$  NMR (400 MHz,  $\text{CDCl}_3$ ):  $\delta$  7.38 (s, 5H), 6.21 (s, 1H), 5.84-5.67 (m, 1H), 5.10 (m, 2H), 4.63 (d,  $J = 15.7$  Hz, 1H), 3.34 (dd,  $J = 15.7, 6.5$  Hz, 1H), 2.64-2.43 (m, 3H), 2.40-2.26 (m, 1H), 2.00-1.78 (m, 2H) ppm;  $^{13}\text{C}$  NMR (100 MHz,  $\text{CDCl}_3$ ):  $\delta$  167.4, 162.6, 136.1, 133.0, 129.4, 128.4 (2C), 127.2 (2C), 117.4, 109.8, 89.2, 45.2, 31.3, 25.9, 19.6 ppm; HRMS (ESI)  $m/z$ :  $[\text{M} + \text{H}]^+$  cacl'd for  $\text{C}_{16}\text{H}_{18}\text{NO}_2$  256.1332, found 256.1327.



**3-(2-Methoxyethyl)-2-phenyl-2,3,6,7-tetrahydrocyclopenta[*e*][1,3]oxazin-4(5*H*)-one**  
**(7g)**

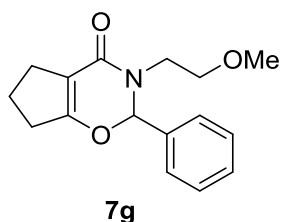

Following the general procedure A, the reaction of secondary amide **5g** (90 mg, 0.50 mmol) gave, after FC (eluent: EA / PE = 1: 3), oxazinone **7g** (101 mg, yield: 74%) as a white solid; Mp 89-92 °C; IR (film)  $\nu_{\max}$ : 2927, 1666, 1464, 1446, 1421, 1362, 1302, 1209, 1118, 1080, 756, 738, 698  $\text{cm}^{-1}$ ;  $^1\text{H}$  NMR (400 MHz,  $\text{CDCl}_3$ ):  $\delta$  7.35 (s, 5H, 6.39 (s, 1H),), 3.96 (dt,  $J = 14.5, 4.3$  Hz, 1H), 3.58-3.48 (m, 1H), 3.44-3.36 (m, 1H), 3.22 (s, 3H), 3.18-3.07 (m, 1H), 2.63-2.53 (m, 1H), 2.52-2.37 (m, 2H), 2.34-2.22 (m, 1H), 1.97-1.73 (m, 2H) ppm;  $^{13}\text{C}$  NMR (100 MHz,  $\text{CDCl}_3$ ):  $\delta$  167.2, 162.8, 136.7, 129.1, 128.3 (2C), 127.1 (2C), 109.7, 90.6, 71.3, 58.6, 43.1, 31.3, 25.8, 19.5, ppm; HRMS (ESI)  $m/z$ :  $[\text{M} + \text{Na}]^+$  cacl'd for  $\text{C}_{16}\text{H}_{19}\text{NO}_3\text{Na}$  296.1257, found 296.1252.

**Methyl 2-(4-oxo-2-phenyl-4,5,6,7-tetrahydrocyclopenta[*e*][1,3]oxazin-3(2*H*)-yl)**  
**acetate (7h)**

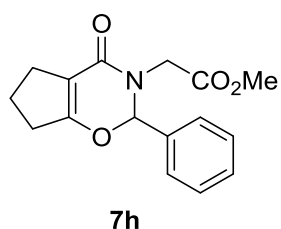

Following the general procedure A, the reaction of secondary amide **5h** (97 mg, 0.50 mmol) gave, after FC (eluent: EA / PE = 1: 3), oxazinone **7h** (105 mg, yield: 73%) as a white solid; Mp 97-100 °C; IR (film)  $\nu_{\max}$ : 2951, 2921, 1749, 1668, 1427, 1396, 1210, 1074, 701  $\text{cm}^{-1}$ ;  $^1\text{H}$  NMR (400 MHz,  $\text{CDCl}_3$ ):  $\delta$  7.52-7.36 (m, 5H), 6.37 (s, 1H), 4.47 (d,  $J = 17.7$  Hz, 1H), 3.61 (s, 3H), 3.24 (d,  $J = 17.7$  Hz, 1H), 2.65-2.57 (m, 2H), 2.54 (t,  $J = 7.7$  Hz, 2H), 2.06-1.93 (m, 2H) ppm;  $^{13}\text{C}$  NMR (100 MHz,  $\text{CDCl}_3$ ):  $\delta$  170.1, 169.9, 164.1, 134.2, 130.3, 128.8 (2C), 127.8 (2C), 109.6, 91.4, 51.9, 43.8, 31.1, 25.9, 19.8 ppm; HRMS (ESI)  $m/z$ :  $[\text{M} + \text{Na}]^+$  cacl'd for  $\text{C}_{16}\text{H}_{17}\text{NO}_4\text{Na}$  310.1050,

found 310.1046.

**3-Benzyl-2-phenyl-2,3,6,7-tetrahydrocyclopenta[e][1,3]oxazin-4(5H)-one (7i)**

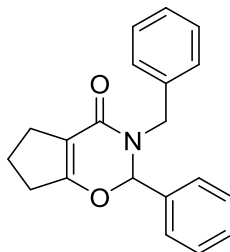

**7i**

Following the general procedure A, the reaction of secondary amide **5i** (106 mg, 0.50 mmol) gave, after FC (eluent: EA / PE = 1: 3), oxazinone **7i** (127 mg, yield: 83%) as a white solid; Mp 78-81 °C; IR (film)  $\nu_{\max}$ : 2922, 2867, 1664, 1462, 1440, 1361, 1301, 1213, 1078, 756, 736, 698  $\text{cm}^{-1}$ ;  $^1\text{H}$  NMR (400 MHz,  $\text{CDCl}_3$ ):  $\delta$  7.41-7.19 (m, 8H) ppm; 7.13 (d,  $J = 6.6$  Hz, 2H), 6.15 (s, 1H), 5.37 (d,  $J = 15.4$  Hz, 1H), 3.82 (d,  $J = 15.5$  Hz, 1H), 2.72-2.61 (m, 1H), 2.60-2.45 (m, 2H), 2.41-2.29 (m, 1H), 2.00-1.79 (m, 2H) ppm;  $^{13}\text{C}$  NMR (100 MHz,  $\text{CDCl}_3$ ):  $\delta$  167.4, 162.9, 137.0, 135.6, 129.4, 128.4 (3C), 127.6 (2C), 127.23 (2C), 127.21 (2C), 109.5, 89.1, 45.9, 31.3, 25.9, 19.6 ppm; HRMS (ESI)  $m/z$ :  $[\text{M} + \text{Na}]^+$  calcd for  $\text{C}_{20}\text{H}_{19}\text{NO}_2\text{Na}$  328.1308, found 328.1302.

**3-(Furan-2-ylmethyl)-2-phenyl-2,3,6,7-tetrahydrocyclopenta[e][1,3]oxazin-4(5H)-one (7j)**

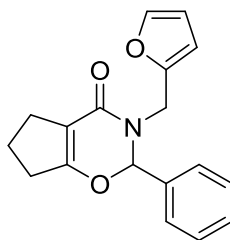

**7j**

Following the general procedure A, the reaction of secondary amide **5j** (101 mg, 0.50 mmol) gave, after FC (eluent: EA / PE = 1: 3), oxazinone **7j** (130 mg, yield: 88%) as a white solid; Mp 92-95 °C; IR (film)  $\nu_{\max}$ : 2923, 2868, 1665, 1460, 1443, 1300, 1205, 1075, 1012, 738, 698  $\text{cm}^{-1}$ ;  $^1\text{H}$  NMR (400 MHz,  $\text{CDCl}_3$ ):  $\delta$  7.41-7.32 (m, 5H), 7.30-7.26 (m, 1H), 6.34-6.21 (m, 2H), 6.14 (d,  $J = 2.8$  Hz, 1H), 5.11 (d,  $J = 15.8$  Hz,

1H), 3.98 (d,  $J = 15.8$  Hz, 1H), 2.68-2.56 (m, 1H), 2.55-2.43 (m, 2H), 2.42-2.29 (m, 1H), 1.99-1.78 (m, 2H) ppm;  $^{13}\text{C}$  NMR (100 MHz,  $\text{CDCl}_3$ ):  $\delta$  167.6, 162.6, 150.4, 142.0, 135.8, 129.4, 128.4 (2C), 127.2 (2C), 110.2, 109.6, 108.3, 89.7, 39.1, 31.3, 25.8, 19.6 ppm; HRMS (ESI)  $m/z$ :  $[\text{M} + \text{Na}]^+$  calcd for  $\text{C}_{18}\text{H}_{17}\text{NO}_3\text{Na}$  318.1101, found 318.1095.

**2-Phenyl-3-(thiophen-2-ylmethyl)-2,3,6,7-tetrahydrocyclopenta[*e*][1,3]oxazin-4(5H)-one (7k)**

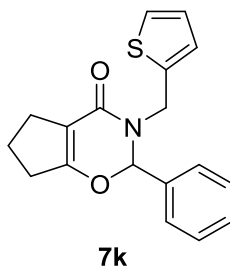

Following the general procedure A, the reaction of secondary amide **5k** (109 mg, 0.50 mmol) gave, after FC (eluent: EA / PE = 1: 3), oxazinone **7k** (141 mg, yield: 90%) as a white solid; Mp 80-83 °C; IR (film)  $\nu_{\text{max}}$ : 2921, 2866, 1663, 1459, 1443, 1367, 1299, 1210, 853, 697  $\text{cm}^{-1}$ ;  $^1\text{H}$  NMR (400 MHz,  $\text{CDCl}_3$ ):  $\delta$  7.46-7.32 (m, 5H), 7.18 (d,  $J = 4.9$  Hz, 1H), 6.89-6.84 (m, 1H), 6.73 (d,  $J = 2.7$  Hz, 1H), 6.22 (s, 1H), 5.32 (d,  $J = 15.6$  Hz, 1H), 4.05 (d,  $J = 15.6$  Hz, 1H), 2.79-2.60 (m, 1H), 2.59-2.45 (m, 2H), 2.43-2.33 (m, 1H), 1.99-1.84 (m, 2H) ppm;  $^{13}\text{C}$  NMR (100 MHz,  $\text{CDCl}_3$ ):  $\delta$  167.9, 162.8, 139.7, 135.6, 129.6, 128.5 (2C), 127.4 (2C), 126.5, 126.4, 125.3, 109.5, 89.7, 40.9, 31.3, 25.9, 19.6 ppm; HRMS (ESI)  $m/z$ :  $[\text{M} + \text{Na}]^+$  calcd for  $\text{C}_{18}\text{H}_{17}\text{NO}_2\text{SNa}$  334.0872, found 334.0865.

**3-(tert-Butyl)-2-phenyl-2,3,6,7-tetrahydrocyclopenta[*e*][1,3]oxazin-4(5H)-one (7l)**

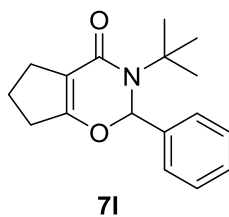

Following the general procedure A, the reaction of secondary amide **5l** (89 mg, 0.50

mmol) gave, after FC (eluent: EA / PE = 1: 3), oxazinone **7l** (69 mg, yield: 51%) as a white solid; Mp 103-106 °C; IR (film)  $\nu_{\max}$ : 2965, 2925, 1635, 1540, 1491, 1451, 1364, 1312, 1218, 718, 695  $\text{cm}^{-1}$ ;  $^1\text{H}$  NMR (400 MHz,  $\text{CDCl}_3$ ):  $\delta$  7.45-7.40 (m, 2H), 7.36-7.29 (m, 3H), 6.62 (s, 1H), 2.60-2.52 (m, 1H), 2.47-2.39 (m, 1H), 2.33-2.25 (m, 1H), 2.22-2.12 (m, 1H), 1.93-1.80 (m, 1H), 1.75-1.65 (m, 1H), 1.52 (s, 9H) ppm;  $^{13}\text{C}$  NMR (100 MHz,  $\text{CDCl}_3$ ):  $\delta$  165.1, 163.8, 139.0, 128.7, 128.1 (2C), 127.0 (2C), 112.5, 87.0, 56.9, 31.1, 29.1 (3C), 25.7, 19.6 ppm; HRMS (ESI)  $m/z$ :  $[\text{M} + \text{H}]^+$  calcd for  $\text{C}_{17}\text{H}_{22}\text{NO}_2$  272.1645, found 272.1644.

**3-Isopropyl-2-(p-tolyl)-2,3,6,7-tetrahydrocyclopenta[e][1,3]oxazin-4(5H)-one (7m)**

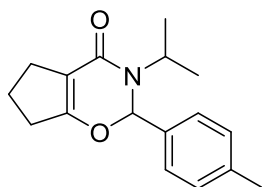

**7m**

Following the general procedure A, the reaction of secondary amide **5m** (89 mg, 0.50 mmol) gave, after FC (eluent: EA / PE = 1: 3), oxazinone **7m** (136 mg, yield: 88%) as a white solid; Mp 116-119 °C; IR (film)  $\nu_{\max}$ : 2971, 1659, 1541, 1507, 1445, 1369, 1298, 1203, 1041, 811  $\text{cm}^{-1}$ ;  $^1\text{H}$  NMR (400 MHz,  $\text{CDCl}_3$ ):  $\delta$  7.31 (d,  $J = 7.7$  Hz, 2H), 7.15 (d,  $J = 7.4$  Hz, 2H), 6.33 (s, 1H), 4.84 (septet,  $J = 6.5$  Hz, 1H), 2.68-2.55 (m, 1H), 2.68-2.55 (m, 1H), 2.51-2.36 (m, 2H), 2.34 (s, 3H), 2.25-2.13 (m, 1H), 1.95-1.81 (m, 1H), 1.80-1.66 (m, 1H), 1.28 (d,  $J = 6.5$  Hz, 3H), 1.04 (d,  $J = 6.5$  Hz, 3H) ppm;  $^{13}\text{C}$  NMR (100 MHz,  $\text{CDCl}_3$ ):  $\delta$  165.7, 162.2, 138.6, 135.5, 128.7 (2C), 126.9 (2C), 110.8, 85.0, 43.7, 31.2, 25.7, 21.2, 21.0, 20.5, 19.4 ppm; HRMS (ESI)  $m/z$ :  $[\text{M} + \text{Na}]^+$  calcd for  $\text{C}_{17}\text{H}_{21}\text{NO}_2\text{Na}$  294.1465, found 294.1460.

**3-Isopropyl-2-(o-tolyl)-2,3,6,7-tetrahydrocyclopenta[e][1,3]oxazin-4(5H)-one (7n)**

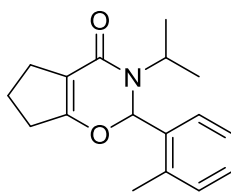

**7n**

Following the general procedure A, the reaction of secondary amide **5n** (89 mg, 0.50 mmol) gave, after FC (eluent: EA / PE = 1: 3), oxazinone **7n** (117 mg, yield: 86%) as a white solid; Mp 101-103 °C; IR (film)  $\nu_{\text{max}}$ : 2966, 2878, 1745, 1661, 1440, 1370, 1202, 1040, 921, 748  $\text{cm}^{-1}$ ;  $^1\text{H}$  NMR (400 MHz,  $\text{CDCl}_3$ ):  $\delta$  7.26 (d,  $J = 6.5$  Hz, 2H), 7.21 (d,  $J = 7.0$  Hz, 1H), 7.14 (t,  $J = 7.2$  Hz, 1H), 6.49 (s, 1H), 4.80 (septet,  $J = 6.5$  Hz, 1H), 2.70-2.58 (m, 1H), 2.51 (s, 3H), 2.49-2.38 (m, 2H), 2.23-2.09 (m, 1H), 1.96-1.82, 1.29 (d,  $J = 6.5$  Hz, 3H), 1.81-1.69 (m, 1H), (m, 1H), 0.94 (d,  $J = 6.5$  Hz, 3H) ppm;  $^{13}\text{C}$  NMR (100 MHz,  $\text{CDCl}_3$ ):  $\delta$  165.5, 162.6, 136.6, 135.3, 131.0, 129.0, 127.7, 125.2, 110.2, 83.7, 43.7, 31.2, 25.9, 21.2, 20.5, 19.5, 19.3 ppm; HRMS (ESI)  $m/z$ :  $[\text{M} + \text{H}]^+$  calcd for  $\text{C}_{17}\text{H}_{22}\text{NO}_2$  272.1645, found 272.1640.

**4-(3-Isopropyl-4-oxo-2,3,4,5,6,7-hexahydrocyclopenta[e][1,3]oxazin-2-yl)phenyl acetate (7o)**

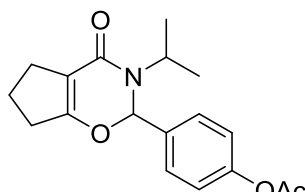

**7o**

Following the general procedure A, the reaction of secondary amide **5o** (111 mg, 0.50 mmol) gave, after FC (eluent: EA / PE = 1: 3), oxazinone **7o** (134 mg, yield: 85%) as a white solid; Mp 120-123 °C; IR (film)  $\nu_{\text{max}}$ : 2970, 2926, 2872, 1762, 1664, 1504, 1445, 1370, 1200, 1164, 1016, 913, 756  $\text{cm}^{-1}$ ;  $^1\text{H}$  NMR (400 MHz,  $\text{CDCl}_3$ ):  $\delta$  7.45 (d,  $J = 7.7$  Hz, 2H), 7.09 (d,  $J = 7.6$  Hz, 2H), 6.37 (s, 1H), 4.87 (septet,  $J = 7.1$  Hz, 1H), 2.67-2.57 (m, 1H), 2.52-2.42 (m, 1H), 2.41-2.34 (m, 1H), 2.30 (s, 3H), 2.26-2.16 (m, 1H), 1.96-1.84 (m, 1H), 1.83-1.70 (m, 1H), 1.29 (d,  $J = 7.1$  Hz, 3H), 1.06 (d,  $J = 7.1$  Hz, 3H) ppm;  $^{13}\text{C}$  NMR (100 MHz,  $\text{CDCl}_3$ ):  $\delta$  169.0, 165.9, 162.1, 150.9, 136.0, 128.1 (2C), 121.2 (2C), 111.0, 84.4, 43.9, 31.2, 25.7, 21.2, 20.9, 20.5, 19.3 ppm;

HRMS (ESI)  $m/z$ :  $[M + H]^+$  cacl'd for  $C_{18}H_{22}NO_4$  316.1543, found 316.1541.

**3-Isopropyl-2-(4-methoxyphenyl)-2,3,6,7-tetrahydrocyclopenta[*e*][1,3]oxazin-4(5*H*)-one (7p)**

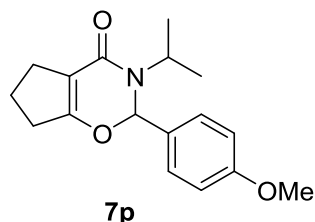

Following the general procedure A, the reaction of secondary amide **5p** (97 mg, 0.50 mmol) gave, after FC (eluent: EA / PE = 1: 3), oxazinone **7p** (113 mg, yield: 78%) as a white solid; Mp 103-106 °C; IR (film)  $\nu_{\max}$ : 2970, 2869, 1659, 1512, 1444, 1307, 1253, 1173, 1033, 823, 757  $\text{cm}^{-1}$ ;  $^1\text{H}$  NMR (400 MHz,  $\text{CDCl}_3$ ):  $\delta$  7.31 (d,  $J = 8.1$  Hz, 1H), 6.83 (d,  $J = 8.1$  Hz, 1H), 6.29 (s, 1H), 4.79 (septet,  $J = 6.7$  Hz, 1H), 3.77 (s, 1H), 2.64-2.51 (m, 1H), 2.46-2.29 (m, 2H), 2.23-2.09 (m, 1H), 1.92-1.79 (m, 1H), 1.77-1.63 (m, 1H), 1.24 (d,  $J = 6.7$  Hz, 3H), 1.00 (d,  $J = 6.7$  Hz, 3H) ppm;  $^{13}\text{C}$  NMR (100 MHz,  $\text{CDCl}_3$ ):  $\delta$  165.7, 162.3, 160.0, 130.5, 128.3 (2C), 113.4 (2C), 110.7, 85.0, 55.1, 43.8, 31.3, 25.8, 21.2, 20.5, 19.4 ppm; HRMS (ESI)  $m/z$ :  $[M + H]^+$  cacl'd for  $C_{17}H_{22}NO_3$  288.1594, found 288.1587.

**2-(Benzo[*d*][1,3]dioxol-5-yl)-3-isopropyl-2,3,6,7-tetrahydrocyclopenta[*e*][1,3]oxazin-4(5*H*)-one (7q)**

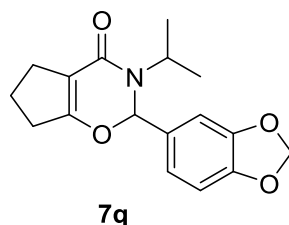

Following the general procedure A, the reaction of secondary amide **5q** (104 mg, 0.50 mmol) gave, after FC (eluent: EA / PE = 1: 3), oxazinone **7q** (142 mg, yield: 94%) as a white solid; Mp 123-126 °C; IR (film)  $\nu_{\max}$ : 2971, 1660, 1490, 1431, 1298, 1241, 1203, 1098, 1038, 929, 872, 791  $\text{cm}^{-1}$ ;  $^1\text{H}$  NMR (400 MHz,  $\text{CDCl}_3$ ):  $\delta$  6.90 (app. d,  $J = 11.7$  Hz, 2H), 6.75 (d,  $J = 7.9$  Hz, 1H), 6.28 (s, 1H), 5.97 (s, 2H), 4.82 (septet,  $J =$

6.6 Hz, 1H), 2.68-2.56 (m, 1H), 2.51-2.34 (m, 2H), 2.29-2.18 (m, 1H), 1.96-1.85 (m, 1H), 1.84-1.71 (m, 1H), 1.27 (d,  $J = 6.6$  Hz, 3H), 1.06 (d,  $J = 6.6$  Hz, 3H) ppm;  $^{13}\text{C}$  NMR (100 MHz,  $\text{CDCl}_3$ ):  $\delta$  165.7, 162.1, 148.0, 147.7, 132.5, 120.9, 110.8, 107.6, 107.4, 101.2, 85.0, 43.8, 31.3, 25.8, 21.3, 20.4, 19.4 ppm; HRMS (ESI)  $m/z$ :  $[\text{M} + \text{H}]^+$  calcd for  $\text{C}_{17}\text{H}_{20}\text{NO}_4$  302.1387, found 302.1382.

***(E)*-3-Isopropyl-2-(4-(phenyldiazenyl)phenyl)-2,3,6,7-tetrahydrocyclopenta[*e*][1,3]oxazin-4(5H)-one (7r)**

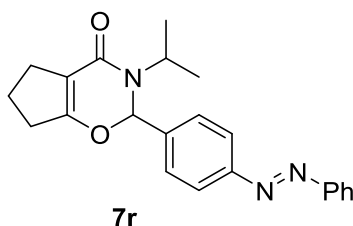

Following the general procedure A, the reaction of secondary amide **5r** (134 mg, 0.50 mmol) gave, after FC (eluent: EA / PE = 1: 3), oxazinone **7r** (155 mg, yield: 86%) as a white solid; Mp 140-143 °C; IR (film)  $\nu_{\text{max}}$ : 2972, 2867, 1659, 1533, 1442, 1221, 1040, 880, 767  $\text{cm}^{-1}$ ;  $^1\text{H}$  NMR (400 MHz,  $\text{CDCl}_3$ ):  $\delta$  7.95-7.85 (m, 4H), 7.58 (d,  $J = 7.5$  Hz, 2H), 7.55-7.45 (m, 3H), 6.41 (s, 1H), 4.92 (septet,  $J = 6.4$  Hz, 1H), 2.70-2.57 (m, 1H), 2.54-2.42 (m, 1H), 2.41-2.31 (m, 1H), 2.28-2.15 (m, 1H), 1.97-1.84 (m, 1H), 1.78-1.67 (m, 1H), 1.31 (d,  $J = 6.4$  Hz, 3H), 1.09 (d,  $J = 6.4$  Hz, 3H) ppm;  $^{13}\text{C}$  NMR (100 MHz,  $\text{CDCl}_3$ ):  $\delta$  166.1, 162.2, 152.9, 152.5, 141.3, 131.3, 129.1 (2C), 127.9 (2C), 122.9 (2C), 122.5 (2C), 111.4, 84.7, 43.9, 31.4, 25.8, 21.4, 20.6, 19.5 ppm; HRMS (ESI)  $m/z$ :  $[\text{M} + \text{Na}]^+$  calcd for  $\text{C}_{22}\text{H}_{23}\text{N}_3\text{O}_2\text{Na}$  384.1682, found 384.1675.

***2*-(4-Bromophenyl)-3-isopropyl-2,3,6,7-tetrahydrocyclopenta[*e*][1,3]oxazin-4(5H)-one (7s)**

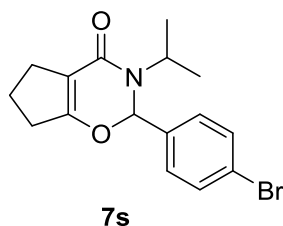

Following the general procedure A, the reaction of secondary amide **5s** (121 mg, 0.50

mmol) gave, after FC (eluent: EA / PE = 1: 3), oxazinone **7s** (147 mg, yield: 87%) as a white solid; Mp 107-109 °C; IR (film)  $\nu_{\max}$ : 2972, 2868, 1656, 1485, 1442, 1225, 1201, 1010, 808, 752  $\text{cm}^{-1}$ ;  $^1\text{H}$  NMR (400 MHz,  $\text{CDCl}_3$ ):  $\delta$  7.48 (d,  $J = 7.5$  Hz, 2H), 7.31 (d,  $J = 7.5$  Hz, 2H), 6.32 (s, 1H), 4.88 (septet,  $J = 6.5$  Hz, 1H), 2.67-2.56 (m, 1H), 2.52-2.40 (m, 1H), 2.40-2.30 (m, 1H), 2.25-2.13 (m, 1H), 1.96-1.84 (m, 1H), 1.81-1.69 (m, 1H), 1.28 (d,  $J = 6.5$  Hz, 3H), 1.05 (d,  $J = 6.5$  Hz, 3H) ppm;  $^{13}\text{C}$  NMR (100 MHz,  $\text{CDCl}_3$ ):  $\delta$  165.9, 162.0, 137.7, 131.3 (2C), 128.7 (2C), 123.0, 111.2, 84.3, 43.8, 31.3, 25.7, 21.3, 20.5, 19.4 ppm; HRMS (ESI)  $m/z$ :  $[\text{M} + \text{Na}]^+$  cacl'd for  $\text{C}_{16}\text{H}_{18}\text{BrNO}_2\text{Na}$  358.0413, found 358.0406.

**2-(2-Bromophenyl)-3-isopropyl-2,3,6,7-tetrahydrocyclopenta[e][1,3]oxazin-4(5H)-one (7t)**

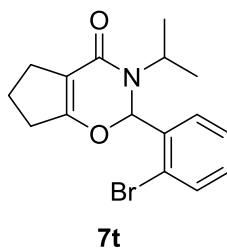

Following the general procedure A, the reaction of secondary amide **5t** (121 mg, 0.50 mmol) gave, after FC (eluent: EA / PE = 1: 3), oxazinone **7t** (144 mg, yield: 86%) as a white solid; Mp 100-103 °C; IR (film)  $\nu_{\max}$ : 2971, 2869, 1667, 1429, 1369, 1204, 1026, 930, 735  $\text{cm}^{-1}$ ;  $^1\text{H}$  NMR (400 MHz,  $\text{CDCl}_3$ ):  $\delta$  7.62 (dd,  $J = 7.7, 1.3$  Hz, 1H), 7.36 (dd,  $J = 7.6, 1.8$  Hz, 1H), 7.30-7.21 (m, 2H), 6.65 (s, 1H), 4.83 (septet,  $J = 6.9$  Hz, 1H), 2.73-2.58 (m, 1H), 2.53-2.39 (m, 2H), 2.25-2.12 (m, 1H), 1.99-1.85 (m, 1H), 1.83-1.71 (m, 1H), 1.83-1.71 (m, 1H), 1.30 (d,  $J = 6.9$  Hz, 3H), 0.90 (d,  $J = 6.9$  Hz, 3H) ppm;  $^{13}\text{C}$  NMR (100 MHz,  $\text{CDCl}_3$ ):  $\delta$  165.4, 162.1, 136.4, 133.5, 130.6, 129.3, 126.8, 123.0, 109.9, 84.6, 43.5, 31.2, 25.8, 20.8, 20.5, 19.4 ppm; HRMS (ESI)  $m/z$ :  $[\text{M} + \text{Na}]^+$  cacl'd for  $\text{C}_{16}\text{H}_{18}\text{BrNO}_2\text{Na}$  358.0413, found 358.0405.

**2-(3-Bromophenyl)-3-isopropyl-2,3,6,7-tetrahydrocyclopenta[e][1,3]oxazin-4(5H)-one (7u)**



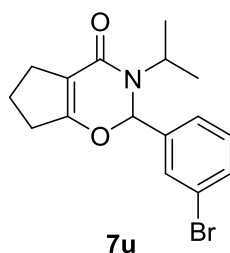

Following the general procedure A, the reaction of secondary amide **5u** (121 mg, 0.50 mmol) gave, after FC (eluent: EA / PE = 1: 3), oxazinone **7u** (154 mg, yield: 91%) as a white solid; Mp 121-124 °C; IR (film)  $\nu_{\max}$ : 2971, 2924, 2868, 1658, 1446, 1421, 1299, 1222, 1203, 1129, 1041, 786  $\text{cm}^{-1}$ ;  $^1\text{H}$  NMR (400 MHz,  $\text{CDCl}_3$ ):  $\delta$  7.59 (s, 1H), 7.47 (d,  $J = 7.9$  Hz, 1H), 7.36 (d,  $J = 7.8$  Hz, 1H), 7.22 (t,  $J = 7.9$  Hz, 1H), 6.33 (s, 1H), 4.88 (septet,  $J = 6.9$  Hz, 1H), 2.66-2.56 (m, 1H), 2.53-2.42 (m, 1H), 2.41-2.31 (m, 1H), 2.29-2.17 (m, 1H), 1.85-1.84 (m, 1H), 1.82-1.70 (m, 1H), 1.28 (d,  $J = 6.9$  Hz, 3H), 1.06 (d,  $J = 6.9$  Hz, 3H) ppm;  $^{13}\text{C}$  NMR (100 MHz,  $\text{CDCl}_3$ ):  $\delta$  165.9, 161.8, 141.0, 131.9, 129.9, 129.6, 125.5, 122.4, 111.2, 84.1, 43.9, 31.2, 25.7, 21.3, 20.5, 19.3 ppm; HRMS (ESI)  $m/z$ :  $[\text{M} + \text{Na}]^+$  caclcd for  $\text{C}_{16}\text{H}_{18}\text{BrNO}_2\text{Na}$  358.0413, found 358.0407.

**2-(4-Chlorophenyl)-3-isopropyl-2,3,6,7-tetrahydrocyclopenta[e][1,3]oxazin-4(5H)-one (7v)**

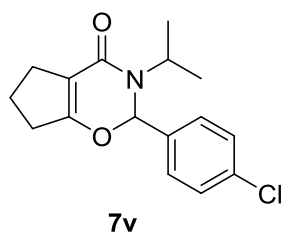

Following the general procedure A, the reaction of secondary amide **5v** (99 mg, 0.50 mmol) gave, after FC (eluent: EA / PE = 1: 3), oxazinone **7v** (135 mg, yield: 93%) as a white solid; Mp 98-101 °C; IR (film)  $\nu_{\max}$ : 2972, 2869, 1659, 1488, 1443, 1224, 1091, 929, 809, 755  $\text{cm}^{-1}$ ;  $^1\text{H}$  NMR (400 MHz,  $\text{CDCl}_3$ ):  $\delta$  7.38 (d,  $J = 8.3$  Hz, 2H), 7.32 (d,  $J = 8.3$  Hz, 2H), 6.34 (s, 1H), 4.88 (septet,  $J = 6.7$  Hz, 1H), 2.68- 2.56 (m, 1H), 2.53-2.40 (m, 1H), 2.40-2.30 (m, 1H), 2.25-2.12 (m, 1H), 1.97-1.82 (m, 1H), 1.81-1.67 (m, 1H), 1.28 (d,  $J = 6.7$  Hz, 3H), 1.05 (d,  $J = 6.7$  Hz, 3H), ppm;  $^{13}\text{C}$  NMR

(100 MHz, CDCl<sub>3</sub>):  $\delta$  165.9, 162.0, 137.2, 134.7, 128.4 (2C), 128.3 (2C), 111.1, 84.3, 43.8, 31.2, 25.7, 21.3, 20.5, 19.4 ppm; HRMS (ESI)  $m/z$ : [M + Na]<sup>+</sup> cacl'd for C<sub>16</sub>H<sub>18</sub>ClNO<sub>2</sub>Na 314.0918, found 314.0913.

**2-(3,4-Dichlorophenyl)-3-isopropyl-2,3,6,7-tetrahydrocyclopenta[e][1,3]oxazin-4(5H)-one (7w)**

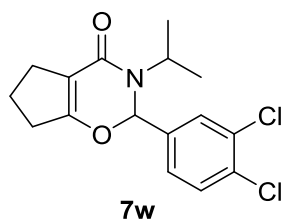

Following the general procedure A, the reaction of secondary amide **5w** (116 mg, 0.50 mmol) gave, after FC (eluent: EA / PE = 1: 3), oxazinone **7w** (148 mg, yield: 90%) as a white solid; Mp 129-132 °C; IR (film)  $\nu_{\text{max}}$ : 2973, 2869, 1656, 1442, 1407, 1390, 1372, 1299, 1221, 1202, 1131, 1031, 932, 899, 872, 852, 821, 755, 736 cm<sup>-1</sup>; <sup>1</sup>H NMR (400 MHz, CDCl<sub>3</sub>):  $\delta$  7.53 (s, 1H), 7.43 (d,  $J$  = 8.3 Hz, 1H), 7.27 (d,  $J$  = 6.6 Hz, 1H), 6.30 (s, 1H), 4.89 (septet,  $J$  = 6.7 Hz, 1H), 2.69-2.56 (m, 1H), 2.55-2.43 (m, 1H), 2.42-2.30 (m, 1H), 2.29-2.17 (m, 1H), 2.00-1.85 (m, 1H), 1.85-1.71 (m, 1H), 1.27 (d,  $J$  = 6.7 Hz, 3H), 1.06 (d,  $J$  = 6.7 Hz, 3H) ppm; <sup>13</sup>C NMR (100 MHz, CDCl<sub>3</sub>):  $\delta$  166.1, 161.8, 139.2, 133.2, 132.7, 130.2, 129.0, 126.3, 111.5, 83.7, 44.0, 31.3, 25.8, 21.4, 20.6, 19.4 ppm; HRMS (ESI)  $m/z$ : [M + H]<sup>+</sup> cacl'd for C<sub>16</sub>H<sub>18</sub>Cl<sub>2</sub>NO<sub>2</sub> 326.0709, found 326.0703.

**2-(4-Fluorophenyl)-3-isopropyl-2,3,6,7-tetrahydrocyclopenta[e][1,3]oxazin-4(5H)-one (7x)**

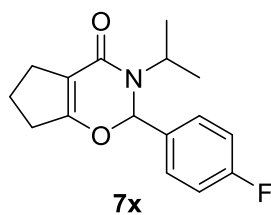

Following the general procedure A, the reaction of secondary amide **5x** (91 mg, 0.50 mmol) gave, after FC (eluent: EA / PE = 1: 3), oxazinone **7x** (107 mg, yield: 78%) as

a white solid; Mp 106-109 °C; IR (film)  $\nu_{\max}$ : 2973, 2871, 1655, 1508, 1443, 1370, 1226, 1157, 827, 757  $\text{cm}^{-1}$ ;  $^1\text{H}$  NMR (400 MHz,  $\text{CDCl}_3$ ):  $\delta$  7.46-7.32 (m, 2H), 7.07-6.94 (m, 2H), 6.31 (s, 1H), 4.84 (septet,  $J = 6.9$  Hz, 1H), 2.66-2.53 (m, 1H), 2.50-2.38 (m, 1H), 2.38-2.28 (m, 1H), 2.23-2.10 (m, 1H), 1.93-1.81 (m, 1H), 1.79-1.67 (m, 1H), 1.25 (d,  $J = 6.9$  Hz, 3H), 1.02 (d,  $J = 6.9$  Hz, 3H) ppm;  $^{13}\text{C}$  NMR (100 MHz,  $\text{CDCl}_3$ ):  $\delta$  165.8, 162.9 (d,  $J_{\text{C-F}} = 248.5$  Hz), 162.1, 134.5 (d,  $J_{\text{C-F}} = 3.0$  Hz), 128.9 (d,  $J_{\text{C-F}} = 8.3$  Hz, 2C), 115.1 (d,  $J_{\text{C-F}} = 21.7$  Hz, 2C), 111.1, 84.5, 43.9, 31.3, 25.8, 21.3, 20.5, 19.4 ppm; HRMS (ESI)  $m/z$ :  $[\text{M} + \text{H}]^+$  caclcd for  $\text{C}_{16}\text{H}_{19}\text{FNO}_2$  276.1394, found 276.1392.

**3-Isopropyl-2-(4-(trifluoromethyl)phenyl)-2,3,6,7-tetrahydrocyclopenta[e][1,3]oxazin-4(5H)-one (7y)**

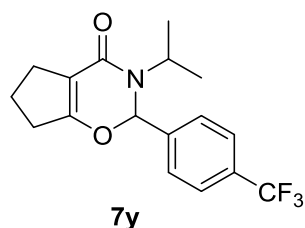

Following the general procedure A, the reaction of secondary amide **5y** (116 mg, 0.50 mmol) gave, after FC (eluent: EA / PE = 1: 3), oxazinone **7y** (135 mg, yield: 83%) as a white solid; Mp 110-113 °C; IR (film)  $\nu_{\max}$ : 2974, 2874, 1659, 1444, 1337, 1164, 1127, 1068, 1017, 825, 759  $\text{cm}^{-1}$ ;  $^1\text{H}$  NMR (400 MHz,  $\text{CDCl}_3$ ):  $\delta$  7.62 (d,  $J = 8.2$  Hz, 2H), 7.57 (d,  $J = 8.2$  Hz, 2H), 6.36 (s, 1H), 4.88 (septet,  $J = 6.9$  Hz, 1H), 2.64-2.53 (m, 1H), 2.51-2.39 (m, 1H), 2.37-2.26 (m, 1H), 2.23- 2.10 (m, 1H), 1.95-1.80 (m, 1H), 1.78-1.65 (m, 1H), 1.27 (d,  $J = 6.9$  Hz, 3H), 1.04 (d,  $J = 6.9$  Hz, 3H) ppm;  $^{13}\text{C}$  NMR (100 MHz,  $\text{CDCl}_3$ ):  $\delta$  162.0, 166.1, 142.7, 131.0 (q,  $J_{\text{C-F}} = 32.4$  Hz), 127.4 (2C), 125.2 (q,  $J_{\text{C-F}} = 3.8$  Hz, 2C), 123.8 (q,  $J_{\text{C-F}} = 272.1$  Hz, 2C), 111.5, 84.2, 43.9, 31.3, 25.8, 21.4, 20.6, 19.4 ppm; HRMS (ESI)  $m/z$ :  $[\text{M} + \text{H}]^+$  caclcd for  $\text{C}_{17}\text{H}_{19}\text{F}_3\text{NO}_2$  326.1362, found 326.1361.

**Methyl 4-(3-isopropyl-4-oxo-2,3,4,5,6,7-hexahydrocyclopenta[e][1,3]oxazin-2-yl)benzoate (7z)**

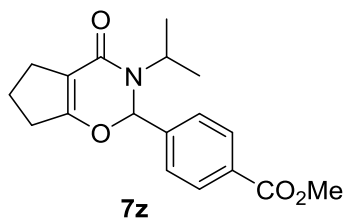

Following the general procedure A, the reaction of secondary amide **5z** (111 mg, 0.50 mmol) gave, after FC (eluent: EA / PE = 1: 3), oxazinone **7z** (142 mg, yield: 90%) as a white solid; Mp 121-124 °C; IR (film)  $\nu_{\text{max}}$ : 2972, 2873, 1725, 1659, 1540, 1442, 1279, 1203, 1108, 1019, 816, 760  $\text{cm}^{-1}$ ;  $^1\text{H}$  NMR (400 MHz,  $\text{CDCl}_3$ ):  $\delta$  8.03 (d,  $J = 7.7$  Hz, 2H), 7.53 (d,  $J = 7.7$  Hz, 2H), 6.40 (s, 1H), 4.91 (septet,  $J = 6.5$  Hz, 1H), 2.69-2.56 (m, 1H), 3.92 (s, 3H), 2.53-2.42 (m, 1H), 2.39-2.28 (m, 1H), 2.26-2.13 (m, 1H), 1.97-1.82 (m, 1H), 1.80-1.66 (m, 1H), 1.30 (d,  $J = 6.5$  Hz, 3H), 1.07 (d,  $J = 6.8$  Hz, 3H) ppm;  $^{13}\text{C}$  NMR (100 MHz,  $\text{CDCl}_3$ ):  $\delta$  166.3, 166.0, 161.9, 143.5, 130.6, 129.3 (2C), 127.0 (2C), 111.3, 84.4, 52.0, 43.8, 31.2, 25.7, 21.3, 20.5, 19.3 ppm; HRMS (ESI)  $m/z$ :  $[\text{M} + \text{H}]^+$  calcd for  $\text{C}_{18}\text{H}_{22}\text{NO}_4$  316.1543, found 316.1538.

**3-Isopropyl-2-(naphthalen-2-yl)-2,3,6,7-tetrahydrocyclopenta[e][1,3]oxazin-4(5H)-one (7aa)**

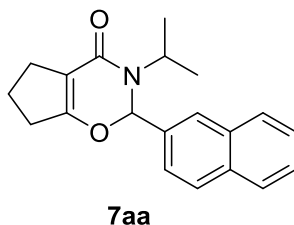

Following the general procedure A, the reaction of secondary amide **5aa** (107 mg, 0.50 mmol) gave, after FC (eluent: EA / PE = 1: 3), oxazinone **7aa** (130 mg, yield: 84%) as a white solid; Mp 138-141 °C; IR (film)  $\nu_{\text{max}}$ : 2970, 2869, 1656, 1447, 1430, 1370, 1295, 1200, 1041, 861, 821, 785, 757  $\text{cm}^{-1}$ ;  $^1\text{H}$  NMR (400 MHz,  $\text{CDCl}_3$ ):  $\delta$  7.90-7.70 (m, 4H), 7.57 (d,  $J = 8.5$  Hz, 1H), 7.54-7.45 (m, 2H), 6.52 (s, 1H), 4.95 (septet,  $J = 6.6$  Hz, 1H), 2.70-2.57 (m, 1H), 2.52-2.40 (m, 1H), 2.39-2.29 (m, 1H), 2.21-2.10 (m, 1H), 1.92-1.79 (m, 1H), 1.73-1.59 (m, 1H), 1.32 (d,  $J = 6.6$  Hz, 3H), 1.08 (d,  $J = 6.6$  Hz, 3H) ppm;  $^{13}\text{C}$  NMR (100 MHz,  $\text{CDCl}_3$ ):  $\delta$  165.8, 162.3, 135.7, 133.3, 132.5, 128.3, 128.2, 127.4, 126.6, 126.5, 126.4, 124.5, 111.1, 85.1, 43.9, 31.2,

25.8, 21.4, 20.5, 19.3 ppm; HRMS (ESI)  $m/z$ :  $[M + H]^+$  cacl'd for  $C_{20}H_{22}NO_2$  308.1645, found 308.1638.

**3-Isopropyl-2-(thiophen-2-yl)-2,3,6,7-tetrahydrocyclopenta[*e*][1,3]oxazin-4(5*H*)-one**  
(**7ab**)

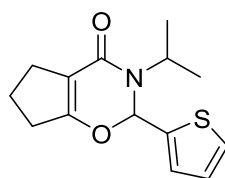

**7ab**

Following the general procedure A, the reaction of secondary amide **5ab** (85 mg, 0.50 mmol) gave, after FC (eluent: EA / PE = 1: 3), oxazinone **7ab** (100 mg, yield: 76%) as a white solid; Mp 82-85 °C; IR (film)  $\nu_{max}$ : 2969, 2917, 1656, 1636, 1436, 1369, 1291, 1200, 1127, 1034, 736  $cm^{-1}$ ;  $^1H$  NMR (400 MHz,  $CDCl_3$ ):  $\delta$  7.32-7.23 (m, 1H), 7.09 (br. s, 1H), 6.93 (br. s, 1H), 6.55 (s, 1H), 4.81 (septet,  $J = 6.6$  Hz, 1H), 2.74- 2.58 (m, 1H), 2.55-2.38 (m, 2H), 2.39-2.26 (m, 1H), 2.04-1.75 (m, 2H), 1.28 (d,  $J = 6.6$  Hz, 3H), 1.13 (d,  $J = 6.6$  Hz, 3H) ppm;  $^{13}C$  NMR (100 MHz,  $CDCl_3$ ):  $\delta$  165.8, 161.5, 142.9, 127.2, 126.3, 126.2, 111.3, 82.3, 44.0, 31.4, 25.8, 21.1, 20.8, 19.5 ppm; HRMS (ESI)  $m/z$ :  $[M + H]^+$  cacl'd for  $C_{14}H_{18}NO_2S$  264.1053, found 264.1049.

**2-(Furan-2-yl)-3-isopropyl-2,3,6,7-tetrahydrocyclopenta[*e*][1,3]oxazin-4(5*H*)-one**  
(**7ac**)

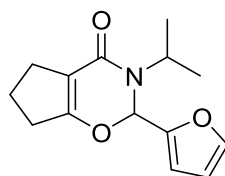

**7ac**

Following the general procedure A, the reaction of secondary amide **5ac** (104 mg, 0.50 mmol) gave, after FC (eluent: EA / PE = 1: 3), oxazinone **7ac** (87 mg, yield: 70%) as a white solid; Mp 90-93 °C; IR (film)  $\nu_{max}$ : 2964, 2867, 1743, 1663, 1439, 1373, 1208, 1013, 859, 750  $cm^{-1}$ ;  $^1H$  NMR (400 MHz,  $CDCl_3$ ):  $\delta$  7.40 (s, 1H), 6.38-6.30 (m, 3H), 4.79 (septet,  $J = 6.6$  Hz, 1H), 2.72-2.58 (m, 1H), 2.55-2.40 (m, 2H), 2.39-2.28

(m, 1H), 2.02-1.78 (m, 2H), 1.26 (d,  $J = 6.6$  Hz, 3H), 1.08 (d,  $J = 6.6$  Hz, 3H) ppm;  $^{13}\text{C}$  NMR (100 MHz,  $\text{CDCl}_3$ ):  $\delta$  165.5, 161.7, 151.2, 143.1, 110.9, 110.4, 110.3, 79.8, 43.7, 31.2, 26.0, 21.0, 20.8, 19.7 ppm; HRMS (ESI)  $m/z$ :  $[\text{M} + \text{H}]^+$  calcd for  $\text{C}_{14}\text{H}_{18}\text{NO}_3$  248.1281, found 248.1276.

**2-(tert-Butyl)-3-isopropyl-2,3,6,7-tetrahydrocyclopenta[e][1,3]oxazin-4(5H)-one**  
**(7ad)**

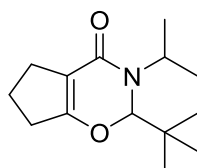

**7ad**

Following the general procedure A, the reaction of secondary amide **5ad** (72 mg, 0.50 mmol) gave, after FC (eluent: EA / PE = 1: 3), oxazinone **7ad** (97 mg, yield: 82%) as a white solid; Mp 80-83 °C; IR (film)  $\nu_{\text{max}}$ : 2951, 2864, 1663, 1634, 1482, 1417, 1303, 1185, 1096, 960, 757  $\text{cm}^{-1}$ ;  $^1\text{H}$  NMR (400 MHz,  $\text{CDCl}_3$ ):  $\delta$  4.92 (s, 1H), 3.62 (septet,  $J = 6.8$  Hz, 1H), 2.65- 2.54 (m, 1H), 2.54-2.42 (m, 2H), 2.41-2.32 (m, 1H), 2.00-1.82 (m, 2H), 1.52 (d,  $J = 6.8$  Hz, 3H), 1.33 (d,  $J = 6.8$  Hz, 3H), 0.99 (s, 9H) ppm;  $^{13}\text{C}$  NMR (100 MHz,  $\text{CDCl}_3$ ):  $\delta$  166.8, 163.9, 110.0, 97.8, 53.9, 39.4, 30.9, 26.3 (3C), 25.4, 21.5, 20.6, 19.5 ppm; HRMS (ESI)  $m/z$ :  $[\text{M} + \text{H}]^+$  calcd for  $\text{C}_{14}\text{H}_{24}\text{NO}_2$  238.1802, found 238.1798.

**2,3-Diisopropyl-2,3,6,7-tetrahydrocyclopenta[e][1,3]oxazin-4(5H)-one (7ae)**

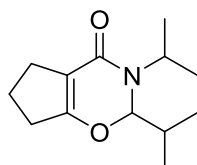

**7ae**

Following the general procedure A, the reaction of secondary amide **5ae** (65 mg, 0.50 mmol) gave, after FC (eluent: EA / PE = 1: 3), oxazinone **7ae** (73 mg, yield: 65%) as a yellow oil; IR (film)  $\nu_{\text{max}}$ : 2967, 2875, 1757, 1654, 1444, 1367, 1215, 1127, 760  $\text{cm}^{-1}$ ;  $^1\text{H}$  NMR (400 MHz,  $\text{CDCl}_3$ ):  $\delta$  4.96 (d,  $J = 7.3$  Hz, 1H), 4.37 (septet,  $J = 6.6$  Hz,

1H), 2.69-2.57 (m, 1H), 2.55-2.40 (m, 3H), 2.39-2.29 (m, 1H), 2.00-1.89 (m, 2H), 1.26 (d,  $J = 6.5$  Hz, 3H), 1.23 (d,  $J = 6.7$  Hz, 3H), 0.98 (t,  $J = 7.7$  Hz, 6H), ppm;  $^{13}\text{C}$  NMR (100 MHz,  $\text{CDCl}_3$ ):  $\delta$  166.7, 163.0, 110.1, 92.5, 47.3, 31.5, 31.1, 25.9, 21.7, 21.2, 19.6, 19.0, 18.6 ppm; HRMS (ESI)  $m/z$ :  $[\text{M} + \text{H}]^+$  cacl'd for  $\text{C}_{13}\text{H}_{22}\text{NO}_2$  224.1645, found 224.1641.

**3-Isopropyl-2-phenethyl-2,3,6,7-tetrahydrocyclopenta[*e*][1,3]oxazin-4(5H)-one (7af)**

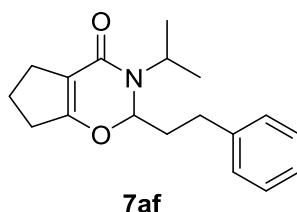

Following the general procedure A, the reaction of secondary amide **5af** (96 mg, 0.50 mmol) gave, after FC (eluent: EA / PE = 1: 3), oxazinone **7af** (60 mg, yield: 42%) as a yellow oil; IR (film)  $\nu_{\text{max}}$ : 2964, 2871, 1744, 1661, 1452, 1369, 1304, 1216, 1042, 848, 756  $\text{cm}^{-1}$ ;  $^1\text{H}$  NMR (400 MHz,  $\text{CDCl}_3$ ):  $\delta$  7.25-7.16 (m, 3H), 7.35-7.28 (m, 2H), 5.28 (d,  $J = 8.0$  Hz, 1H), 4.62 (septet,  $J = 6.6$  Hz, 1H), 2.82-2.68 (m, 3H), 2.67-2.58 (m, 1H), 2.55-2.43 (m, 2H), 2.39-2.28 (m, 1H), 2.00-1.87 (m, 2H), 1.76-1.61 (m, 1H), 1.11 (d,  $J = 6.6$  Hz, 3H), 1.06 (d,  $J = 6.6$  Hz, 3H) ppm;  $^{13}\text{C}$  NMR (100 MHz,  $\text{CDCl}_3$ ):  $\delta$  165.3, 161.3, 140.4, 128.5, 128.4 (2C), 126.2 (2C), 109.8, 85.2, 43.5, 34.6, 31.5, 31.1, 26.0, 21.3, 20.7, 19.7 ppm; HRMS (ESI)  $m/z$ :  $[\text{M} + \text{H}]^+$  cacl'd for  $\text{C}_{18}\text{H}_{24}\text{NO}_2$  286.1802, found 286.1795.

**3-Isopropyl-2-phenyl-2,3,5,6,7,8-hexahydro-4H-benzo[*e*][1,3]oxazin-4-one (9a)**

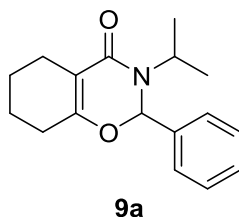

Following the general procedure B, the reaction of secondary amide **5a** (82 mg, 0.5 mmol) with pimeloyl chloride (654  $\mu$ L, 4.0 mmol) gave, after FC (eluent: EA / PE = 1: 20), oxazinone **9a** (117 mg, yield: 86%) as a white solid; Mp 103-105  $^{\circ}$ C; IR (film)  $\nu_{\max}$  2926, 2854, 1663, 1639, 1457, 1435, 1228, 1215, 762, 732  $\text{cm}^{-1}$ ;  $^1\text{H}$  NMR (400 MHz,  $\text{CDCl}_3$ )  $\delta$  7.43-7.30 (m, 5H), 6.17 (s, 1H), 4.83 (septet,  $J = 6.9$  Hz, 1H), 2.41-2.28 (m, 1H), 2.18-2.02 (m, 2H), 1.82-1.72 (m, 1H), 1.70-1.55 (m, 2H), 1.56-1.43 (m, 1H), 1.30 (d,  $J = 6.9$  Hz, 3H), 1.22-1.16 (m, 1H), 1.04 (d,  $J = 6.9$  Hz, 3H) ppm;  $^{13}\text{C}\{^1\text{H}\}$  NMR (100 MHz,  $\text{CDCl}_3$ )  $\delta$  163.0, 158.9, 138.7, 128.7, 128.1 (2C), 127.0 (2C), 109.3, 82.7, 44.3, 27.4, 21.8, 21.7, 21.3, 21.2, 20.2 ppm; HRMS (ESI)  $m/z$ :  $[\text{M} + \text{Na}]^+$  calcd for  $\text{C}_{17}\text{H}_{21}\text{NO}_2\text{Na}$  294.1465, found 294.1471.

**3-Isopropyl-2-(4-methoxyphenyl)-2,3,5,6,7,8-hexahydro-4H-benzo[e][1,3]oxazin-4-one (9b)**

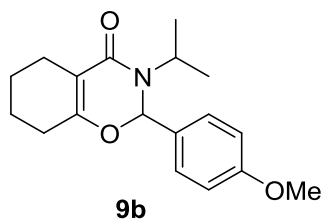

Following the general procedure B, the reaction of secondary amide **5p** (97 mg, 0.5 mmol) with pimeloyl chloride (654  $\mu$ L, 4.0 mmol) gave, after FC (eluent: EA / PE = 1: 20), oxazinone **9b** (128 mg, yield: 85%) as a white solid; Mp 102-104  $^{\circ}$ C; IR (film)  $\nu_{\max}$  2956, 2925, 2854, 1721, 1667, 1614, 1586, 1463, 1378, 1252  $\text{cm}^{-1}$ ;  $^1\text{H}$  NMR (400 MHz,  $\text{CDCl}_3$ )  $\delta$  7.36-7.28 (m, 2H), 6.95-6.78 (m, 2H), 6.17 (s, 1H), 4.77 (hept,  $J = 6.9$  Hz, 1H), 3.81 (s, 3H), 2.41-2.28 (m, 1H), 2.21-2.01 (m, 2H), 1.88-1.69 (m, 2H), 1.70-1.55 (m, 2H), 1.55-1.39 (m, 1H), 1.29 (d,  $J = 6.9$  Hz, 3H), 1.03 (d,  $J = 6.9$  Hz, 3H) ppm;  $^{13}\text{C}\{^1\text{H}\}$  NMR (100 MHz,  $\text{CDCl}_3$ )  $\delta$  163.0, 159.9, 158.7, 130.8, 128.3 (2C), 113.4 (2C), 109.0, 82.6, 55.2, 44.2, 27.4, 21.9, 21.7, 21.2, 21.2, 20.2 ppm; HRMS (ESI)  $m/z$ :  $[\text{M} + \text{Na}]^+$  calcd for  $\text{C}_{18}\text{H}_{23}\text{NO}_3\text{Na}$  324.1570 found 324.1571.



**3-Isopropyl-2-(4-(trifluoromethyl)phenyl)-2,3,5,6,7,8-hexahydro-4H-benzo[e][1,3]oxazin-4-one (9c)**

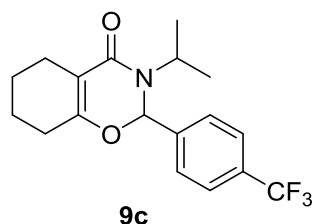

Following the general procedure B, the reaction of secondary amide **5y** (116 mg, 0.5 mmol) with pimeloyl chloride (654  $\mu$ L, 4.0 mmol) gave, after FC (eluent: EA / PE = 1: 20), oxazinone **9c** (115 mg, yield: 68%) as a white solid; Mp 110-112  $^{\circ}$ C; IR (film)  $\nu_{\text{max}}$  2937, 2860, 1662, 1640, 1442, 1411, 1326, 1166, 1128, 1112  $\text{cm}^{-1}$ ;  $^1\text{H}$  NMR (400 MHz,  $\text{CDCl}_3$ )  $\delta$  7.67-7.48 (m, 4H), 6.24 (s, 1H), 4.87 (septet,  $J = 6.9$  Hz, 1H), 2.42-2.23 (m, 1H), 2.20-2.00 (m, 2H), 1.85-1.73 (m, 1H), 1.72-1.57 (m, 2H), 1.57-1.43 (m, 1H), 1.31 (d,  $J = 6.9$  Hz, 3H), 1.27-1.17 (m, 1H), 1.05 (d,  $J = 6.9$  Hz, 3H) ppm;  $^{13}\text{C}\{^1\text{H}\}$  NMR (100 MHz,  $\text{CDCl}_3$ )  $\delta$  162.7, 159.2, 142.9, 131.0 (q,  $J_{\text{C-F}} = 32.5$  Hz), 127.3 (2C), 125.2 (q,  $J_{\text{C-F}} = 3.7$  Hz, 2C), 123.9 (q,  $J_{\text{C-F}} = 272.2$  Hz), 109.6, 81.8, 44.3, 27.4, 21.7, 21.6, 21.4, 21.2, 20.3 ppm; HRMS (ESI)  $m/z$ :  $[\text{M} + \text{Na}]^+$  calcd for  $\text{C}_{18}\text{H}_{20}\text{F}_3\text{NO}_2\text{Na}$  362.1338, found 362.1338.

**Methyl 4-(3-isopropyl-4-oxo-3,4,5,6,7,8-hexahydro-2H-benzo[e][1,3]oxazin-2-yl)benzoate (9d)**

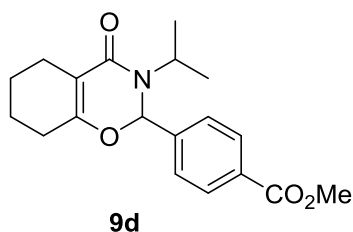

Following the general procedure B, the reaction of secondary amide **5z** (111 mg, 0.5 mmol) with pimeloyl chloride (654  $\mu$ L, 4.0 mmol) gave, after FC (eluent: EA / PE = 1: 20), oxazinone **9d** (140 mg, yield: 85%) as a white solid; Mp 106-108  $^{\circ}$ C; IR (film)  $\nu_{\text{max}}$  2956, 2926, 2854, 1726, 1663, 1644, 1494, 1438, 1311, 1278  $\text{cm}^{-1}$ ;  $^1\text{H}$  NMR

(400 MHz, CDCl<sub>3</sub>)  $\delta$  8.01 (d,  $J = 7.7$  Hz, 2H), 7.48 (d,  $J = 8.0$  Hz, 2H), 6.23 (s, 1H), 4.87 (septet,  $J = 7.0$  Hz, 1H), 3.92 (s, 3H), 2.39-2.27 (m, 1H), 2.16-2.03 (m, 2H), 1.83-1.70 (m, 1H), 1.66-1.56 (m, 2H), 1.55-1.44 (m, 1H), 1.30 (d,  $J = 7.0$  Hz, 3H), 1.23-1.11 (m, 1H), 1.05 (d,  $J = 7.0$  Hz, 3H) ppm; <sup>13</sup>C{<sup>1</sup>H} NMR (100 MHz, CDCl<sub>3</sub>)  $\delta$  166.6, 162.8, 159.1, 143.8, 130.6, 129.4 (2C), 127.0 (2C), 109.6, 82.0, 52.2, 44.2, 27.5, 21.8, 21.6, 21.4, 21.2, 20.2 ppm; HRMS (ESI)  $m/z$  [M + Na]<sup>+</sup> calcd for C<sub>19</sub>H<sub>23</sub>NO<sub>4</sub>Na 352.1519, found 352.1519.

**2-(4-Chlorophenyl)-3-isopropyl-2,3,5,6,7,8-hexahydro-4H-benzo[e][1,3]oxazin-4-one (9e)**

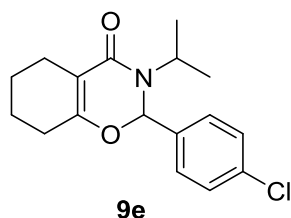

Following the general procedure B, the reaction of secondary amide **5v** (99 mg, 0.5 mmol) with pimeloyl chloride (654  $\mu$ L, 4.0 mmol) gave, after FC (eluent: EA / PE = 1: 20), oxazinone **9e** (127 mg, yield: 83%) as a white solid; Mp 116-118 °C; IR (film)  $\nu_{\max}$  2924, 2852, 1661, 1634, 1441, 1404, 1310, 1291, 1227, 1214 cm<sup>-1</sup>; <sup>1</sup>H NMR (400 MHz, CDCl<sub>3</sub>)  $\delta$  7.40-7.28 (m, 4H), 6.17 (s, 1H), 4.83 (septet,  $J = 6.9$  Hz, 1H), 2.41-2.28 (m, 1H), 2.18-2.03 (m, 2H), 1.82-1.72 (m, 1H), 1.71-1.56 (m, 2H), 1.56-1.43 (m, 1H), 1.29 (d,  $J = 6.9$  Hz, 3H), 1.27-1.16 (m, 1H), 1.03 (d,  $J = 6.9$  Hz, 3H) ppm; <sup>13</sup>C{<sup>1</sup>H} NMR (100 MHz, CDCl<sub>3</sub>)  $\delta$  162.8, 158.9, 137.4, 134.7, 128.4 (2C), 128.4 (2C), 109.4, 81.9, 44.2, 27.4, 21.8, 21.7, 21.3, 21.2, 20.2 ppm; HRMS (ESI)  $m/z$  [M + Na]<sup>+</sup> calcd for C<sub>17</sub>H<sub>20</sub>ClNO<sub>2</sub>Na 328.1075, found 328.1081.

**2-(tert-Butyl)-3-isopropyl-2,3,5,6,7,8-hexahydro-4H-benzo[e][1,3]oxazin-4-one (9f)**

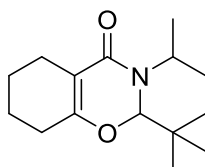

**9f**

Following the general procedure B, the reaction of secondary amide **5ad** (72 mg, 0.5 mmol) with pimeloyl chloride (654  $\mu$ L, 4.0 mmol) gave, after FC (eluent: EA / PE = 1: 20), oxazinone **9f** (60 mg, yield: 48%) as a white solid; Mp 66-68  $^{\circ}$ C; IR (film)  $\nu_{\max}$  2959, 2931, 2869, 1674, 1640, 1479, 1457, 1398, 1380, 1309  $\text{cm}^{-1}$ ;  $^1\text{H}$  NMR (400 MHz,  $\text{CDCl}_3$ )  $\delta$  4.74 (s, 1H), 3.44 (septet,  $J = 6.8$  Hz, 1H), 2.38-2.26 (m, 1H), 2.21-2.01 (m, 3H), 1.79-1.69 (m, 2H), 1.68-1.58 (m, 1H), 1.56 (d,  $J = 6.8$  Hz, 3H), 1.50-1.39 (m, 1H), 1.36 (d,  $J = 6.8$  Hz, 3H), 0.99 (s, 9H) ppm;  $^{13}\text{C}\{^1\text{H}\}$  NMR (100 MHz,  $\text{CDCl}_3$ )  $\delta$  164.3, 159.8, 107.9, 95.3, 54.7, 39.5, 26.9, 26.5 (3C), 22.1, 21.9, 21.5, 20.8, 20.3 ppm; HRMS (ESI)  $m/z$   $[\text{M} + \text{Na}]^+$  calcd for  $\text{C}_{15}\text{H}_{25}\text{NO}_2\text{Na}$  274.1778, found 274.1778.

**2,3-Diisopropyl-2,3,5,6,7,8-hexahydro-4H-benzo[e][1,3]oxazin-4-one (9g)**

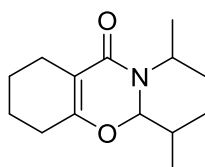

**9g**

Following the general procedure B, the reaction of secondary amide **5ae** (65 mg, 0.5 mmol) with pimeloyl chloride (654  $\mu$ L, 4.0 mmol) gave, after FC (eluent: EA / PE = 1: 20), oxazinone **9g** (56 mg, yield: 47%) as colorless oil; IR (film)  $\nu_{\max}$  2960, 2929, 2873, 2857, 1659, 1641, 1450, 1398, 1393, 1210  $\text{cm}^{-1}$ ;  $^1\text{H}$  NMR (400 MHz,  $\text{CDCl}_3$ )  $\delta$  4.81 (d,  $J = 7.3$  Hz, 1H), 4.26 (septet,  $J = 6.9$  Hz, 1H), 2.41-2.26 (m, 2H), 2.22-2.06 (m, 3H), 1.81-1.69 (m, 2H), 1.65-1.53 (m, 1H), 1.53-1.43 (m, 1H), 1.30 (d,  $J = 6.9$  Hz, 3H), 1.24 (d,  $J = 6.9$  Hz, 3H), 0.97 (t,  $J = 6.6$  Hz, 6H) ppm;  $^{13}\text{C}\{^1\text{H}\}$  NMR (100 MHz,  $\text{CDCl}_3$ )  $\delta$  163.4, 159.6, 108.0, 89.8, 47.9, 31.6, 27.1, 22.1, 21.9, 21.3, 21.2, 21.1, 18.9,

18.5 ppm; HRMS (ESI)  $m/z$   $[M + Na]^+$  calcd for  $C_{14}H_{23}NO_2Na$  260.1621, found 260.1621.

**3-Isopropyl-2-phenethyl-2,3,5,6,7,8-hexahydro-4H-benzo[e][1,3]oxazin-4-one (9h)**

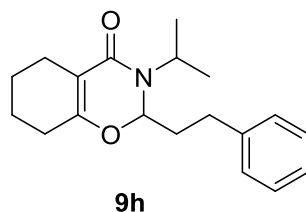

Following the general procedure B, the reaction of secondary amide **5af** (96 mg, 0.5 mmol) with pimeloyl chloride (654  $\mu$ L, 4.0 mmol) gave, after FC (eluent: EA / PE = 1: 20), oxazinone **9h** (37 mg, yield: 25%) as colorless oil; IR (film)  $\nu_{max}$  2932, 2858, 1772, 1716, 1662, 1637, 1586, 1495, 1460, 1442  $cm^{-1}$ ;  $^1H$  NMR (400 MHz,  $CDCl_3$ )  $\delta$  7.37-7.27 (m, 2H), 7.25-7.10 (m, 3H), 5.15 (dd,  $J = 9.6, 2.7$  Hz, 1H), 4.58 (septet,  $J = 6.9$  Hz, 1H), 2.81-2.61 (m, 3H), 2.41-2.30 (m, 1H), 2.26-2.11 (m, 2H), 2.08-1.97 (m, 1H), 1.83-1.71 (m, 2H), 1.67-1.46 (m, 3H), 1.13 (d,  $J = 6.9$  Hz, 3H), 1.06 (d,  $J = 6.9$  Hz, 3H) ppm;  $^{13}C\{^1H\}$  NMR (100 MHz,  $CDCl_3$ )  $\delta$  161.9, 158.2, 140.6, 128.6 (2C), 128.4 (2C), 126.2, 107.8, 82.5, 43.8, 34.4, 31.6, 27.2, 22.1, 22.0, 21.3, 21.0, 20.6 ppm; HRMS (ESI)  $m/z$   $[M + Na]^+$  calcd for  $C_{19}H_{25}NO_2Na$  322.1778, found 322.1778.

**3-Ethyl-2-phenyl-2,3,5,6,7,8-hexahydro-4H-benzo[e][1,3]oxazin-4-one (9i)**

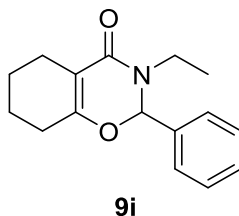

Following the general procedure B, the reaction of secondary amide **5ag** (75 mg, 0.5 mmol) with pimeloyl chloride (654  $\mu$ L, 4.0 mmol) gave, after FC (eluent: EA / PE = 1: 20), oxazinone **9i** (106 mg, yield: 82%) as colorless oil; IR (film)  $\nu_{max}$  2923, 2851, 1664, 1646, 1470, 1446, 1417, 762, 733, 670  $cm^{-1}$ ;  $^1H$  NMR (400 MHz,  $CDCl_3$ )  $\delta$

7.50-7.35 (m, 5H), 6.08 (s, 1H), 3.76 (dq,  $J = 14.1, 7.2$  Hz, 1H), 2.95 (dq,  $J = 14.1, 7.1$  Hz, 1H), 2.38-2.28 (m, 1H), 2.28-2.12 (m, 2H), 2.05-1.95 (m, 1H), 1.67-1.55 (m, 3H), 1.55-1.44 (m, 1H), 1.08 (t,  $J = 7.1$  Hz, 3H) ppm;  $^{13}\text{C}\{^1\text{H}\}$  NMR (100 MHz,  $\text{CDCl}_3$ )  $\delta$  164.0, 160.6, 136.6, 129.4, 128.5 (2C), 127.3 (2C), 108.1, 87.6, 38.5, 27.3, 21.9, 21.8, 21.3, 13.6 ppm; HRMS (ESI)  $m/z$   $[\text{M} + \text{Na}]^+$  calcd for  $\text{C}_{16}\text{H}_{19}\text{NO}_2\text{Na}$  280.1308 found 280.1314.

**3-Benzyl-2-phenyl-2,3,5,6,7,8-hexahydro-4H-benzo[e][1,3]oxazin-4-one (9j)**

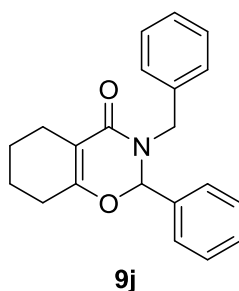

Following the general procedure B, the reaction of secondary amide **5i** (106 mg, 0.5 mmol) with pimeloyl chloride (654  $\mu\text{L}$ , 4.0 mmol) gave, after FC (eluent: EA / PE = 1: 20), oxazinone **9j** (142 mg, yield: 89%) as colorless oil; IR (film)  $\nu_{\text{max}}$  2956, 2926, 2855, 1664, 1495, 1435, 1414, 1184, 965, 699  $\text{cm}^{-1}$ ;  $^1\text{H}$  NMR (400 MHz,  $\text{CDCl}_3$ )  $\delta$  7.38-7.31 (m, 3H), 7.30-7.26 (m, 3H), 7.25-7.19 (m, 2H), 7.15-7.10 (m, 2H), 6.02 (s, 1H), 5.29 (d,  $J = 15.5$  Hz, 1H), 3.84 (d,  $J = 15.5$  Hz, 1H), 2.43-2.25 (m, 2H), 2.23-2.09 (m, 1H), 2.05-1.94 (m, 1H), 1.69-1.58 (m, 3H), 1.57-1.42 (m, 1H) ppm;  $^{13}\text{C}\{^1\text{H}\}$  NMR (100 MHz,  $\text{CDCl}_3$ )  $\delta$  164.1, 161.0, 137.1, 135.9, 129.4, 128.4 (4C), 127.8 (2C), 127.4 (2C), 127.2, 107.7, 87.0, 46.4, 27.3, 21.9, 21.8, 21.4 ppm; HRMS (ESI)  $m/z$   $[\text{M} + \text{Na}]^+$  calcd for  $\text{C}_{21}\text{H}_{21}\text{NO}_2\text{Na}$  342.1465, found 342.1465.

**Methyl 2-(4-oxo-2-phenyl-5,6,7,8-tetrahydro-2H-benzo[e][1,3]oxazin-3(4H)-yl) acetate (9k)**

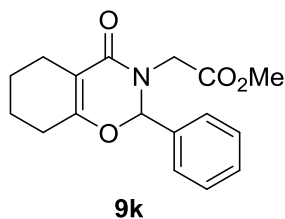

Following the general procedure B, the reaction of secondary amide **5h** (97 mg, 0.5 mmol) with pimeloyl chloride (654  $\mu$ L, 4.0 mmol) gave, after FC (eluent: EA / PE = 1: 20), oxazinone **9k** (104 mg, yield: 69%) as a white solid; Mp 94-96  $^{\circ}$ C; IR (film)  $\nu_{\max}$  2922, 2851, 1748, 1664, 1458, 1420, 1397, 1210, 1182, 1159  $\text{cm}^{-1}$ ;  $^1\text{H}$  NMR (400 MHz,  $\text{CDCl}_3$ )  $\delta$  7.50-7.46 (m, 2H), 7.46-7.40 (m, 3H), 6.27 (s, 1H), 4.48 (d,  $J = 17.7$  Hz, 1H), 3.64 (s, 3H), 3.23 (d,  $J = 17.7$  Hz, 1H), 2.40-2.32 (m, 2H), 2.28-2.15 (m, 2H), 1.84-1.73 (m, 2H), 1.65-1.49 (m, 2H) ppm;  $^{13}\text{C}\{^1\text{H}\}$  NMR (100 MHz,  $\text{CDCl}_3$ )  $\delta$  170.2, 165.7, 163.7, 134.6, 130.3, 128.9 (2C), 128.0 (2C), 107.3, 89.3, 52.0, 44.1, 27.2, 21.9 (2C), 21.5 ppm; HRMS (ESI)  $m/z$   $[\text{M} + \text{Na}]^+$  calcd for  $\text{C}_{17}\text{H}_{19}\text{NO}_4\text{Na}$  324.1206, found 324.1207.

**3-Cyclohexyl-2-phenyl-2,3,5,6,7,8-hexahydro-4H-benzo[e][1,3]oxazin-4-one (9l)**

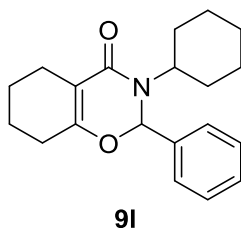

Following the general procedure B, the reaction of secondary amide **5c** (102 mg, 0.5 mmol) with pimeloyl chloride (654  $\mu$ L, 4.0 mmol) gave, after FC (eluent: EA / PE = 1: 20), oxazinone **9l** (117 mg, yield: 75%) as a white solid; Mp 154-156  $^{\circ}$ C; IR (film)  $\nu_{\max}$  2922, 2851, 1663, 1636, 1493, 1433, 1392, 761, 735, 698  $\text{cm}^{-1}$ ;  $^1\text{H}$  NMR (400 MHz,  $\text{CDCl}_3$ )  $\delta$  7.49-7.40 (m, 2H), 7.39-7.30 (m, 3H), 6.38 (s, 1H), 4.49 (tt,  $J = 12.2, 3.7$  Hz, 1H), 2.69-2.54 (m, 1H), 2.52-2.39 (m, 1H), 2.39-2.29 (m, 1H), 2.24-2.11 (m, 1H), 2.10-1.14 (m, 12H), 1.13-0.93 (m, 2H) ppm;  $^{13}\text{C}\{^1\text{H}\}$  NMR (100 MHz,  $\text{CDCl}_3$ )  $\delta$  162.9, 158.7, 138.9, 128.6, 128.0 (2C), 127.0 (2C), 109.3, 82.9, 52.0, 31.5, 30.9, 27.4,

25.8, 25.8, 25.4, 21.8, 21.7, 21.2 ppm; HRMS (ESI)  $m/z$   $[M + Na]^+$  calcd for  $C_{20}H_{25}NO_2Na$  334.1778, found 334.1780.

**3-Benzyl-6-methyl-2-phenyl-2,3-dihydro-4H-1,3-oxazin-4-one (13a)**

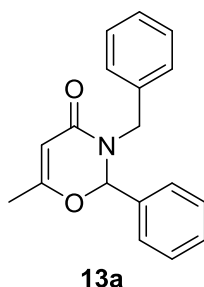

Following the general procedure C, the reaction of secondary amide **5i** (106 mg, 0.5 mmol) with acetyl chloride (284  $\mu$ L, 4.0 mmol) gave, after FC (eluent: EA / PE = 1: 20), oxazinone **13a** (117 mg, yield: 84%) as colorless oil; IR (film)  $\nu_{max}$  2920, 2850, 1669, 1633, 1470, 1429, 1389, 1357, 729, 698  $cm^{-1}$ ;  $^1H$  NMR (400 MHz,  $CDCl_3$ )  $\delta$  7.40-7.33 (m, 3H), 7.32-7.24 (m, 5H), 7.16-7.10 (m, 2H), 6.08 (s, 1H), 5.36 (d,  $J = 15.4$  Hz, 1H), 5.33 (s, 1H), 3.80 (d,  $J = 15.4$  Hz, 1H), 1.87 (s, 3H) ppm;  $^{13}C\{^1H\}$  NMR (100 MHz,  $CDCl_3$ )  $\delta$  164.8, 163.5, 136.8, 135.5, 129.6, 128.6 (2C), 128.5 (2C), 127.8 (2C), 127.5, 127.4 (2C), 100.1, 87.7, 46.2, 19.7 ppm; HRMS (ESI)  $m/z$   $[M + Na]^+$  calcd for  $C_{18}H_{17}NO_2Na$  302.1151, found 302.1155.

**3,6-Dibenzyl-2,5-diphenyl-2,3-dihydro-4H-1,3-oxazin-4-one (13b)**

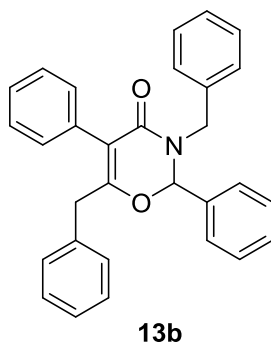

Following the general procedure C, the reaction of secondary amide **5i** (106 mg, 0.5 mmol) with phenylacetyl chloride (529  $\mu$ L, 4.0 mmol) gave, after FC (eluent: EA / PE

= 1: 20), oxazinone **13b** (196 mg, yield: 91%) as light yellow oil; IR (film)  $\nu_{\max}$  2920, 2850, 1656, 1495, 1454, 1443, 1427, 781, 744, 698  $\text{cm}^{-1}$ ;  $^1\text{H}$  NMR (400 MHz,  $\text{CDCl}_3$ )  $\delta$  7.37-7.32 (m, 3H), 7.31-7.20 (m, 10H), 7.18-7.07 (m, 5H), 6.88-6.77 (m, 2H), 6.12 (s, 1H), 5.39 (d,  $J = 15.2$  Hz, 1H), 3.88 (d,  $J = 15.2$  Hz, 1H), 3.44-3.31 (dd, 2H) ppm;  $^{13}\text{C}\{^1\text{H}\}$  NMR (100 MHz,  $\text{CDCl}_3$ )  $\delta$  163.2, 160.9, 136.7, 135.8, 135.3, 133.2, 131.0 (2C), 129.3, 128.7 (2C), 128.6 (2C), 128.29 (2C), 128.26 (2C), 128.1 (4C), 127.5 (2C), 127.3 (2C), 126.4, 114.6, 86.9, 47.0, 37.5 ppm; HRMS (ESI)  $m/z$   $[\text{M} + \text{Na}]^+$  calcd for  $\text{C}_{30}\text{H}_{25}\text{NO}_2\text{Na}$  454.1778, found 454.1778.



# $^1\text{H}$ and $^{13}\text{C}$ NMR spectra of compound 7a

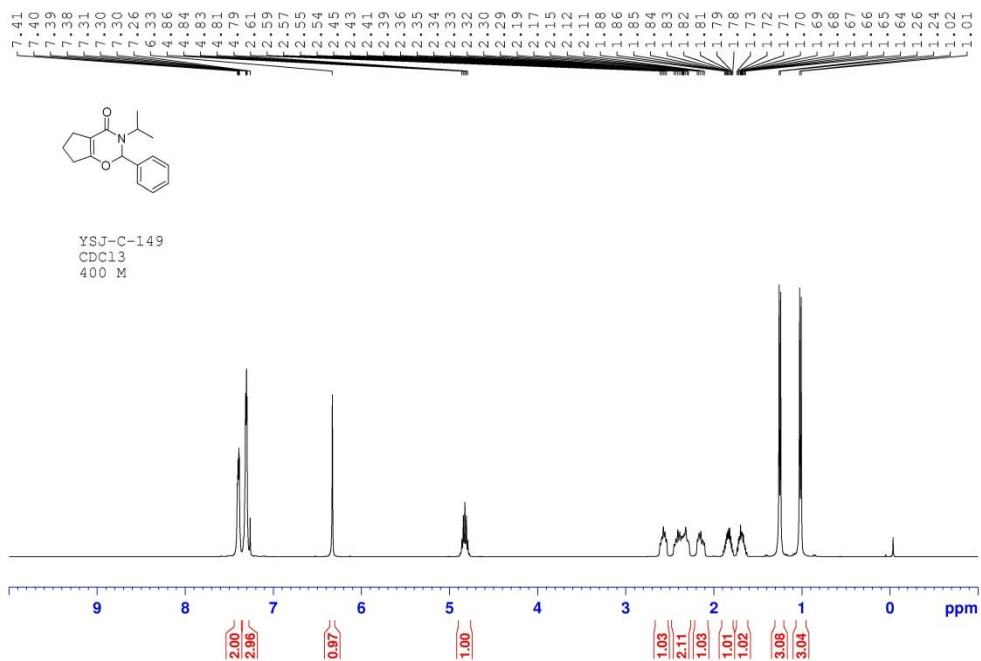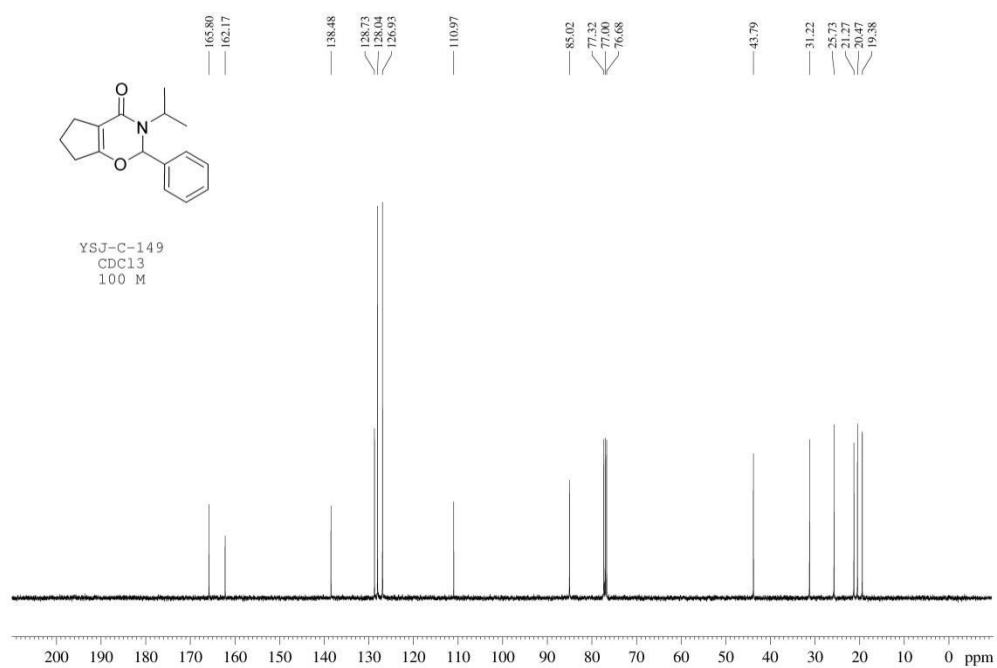

# $^1\text{H}$ and $^{13}\text{C}$ NMR spectra of compound 7b

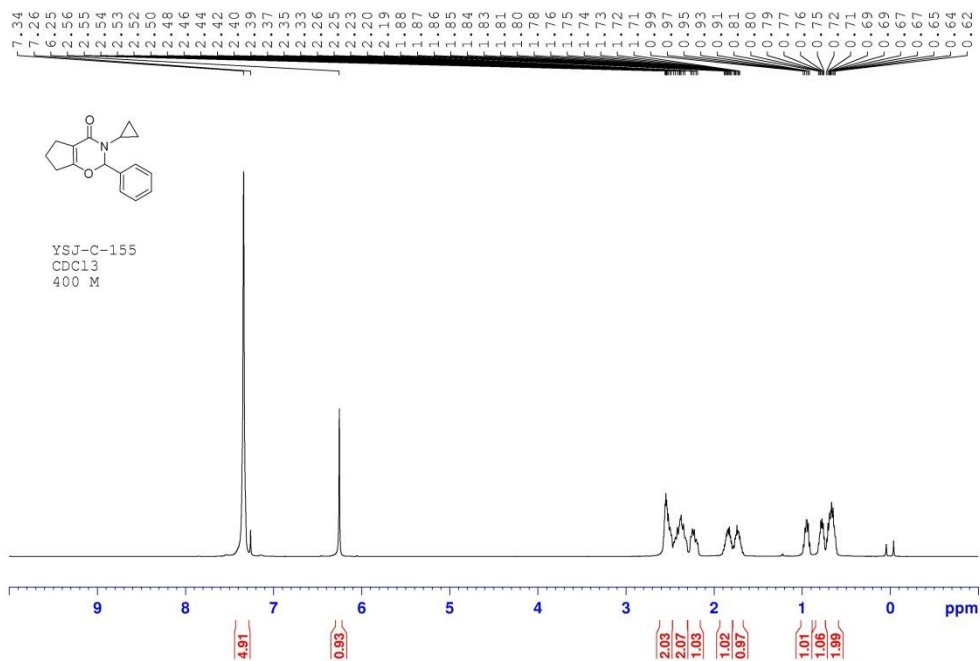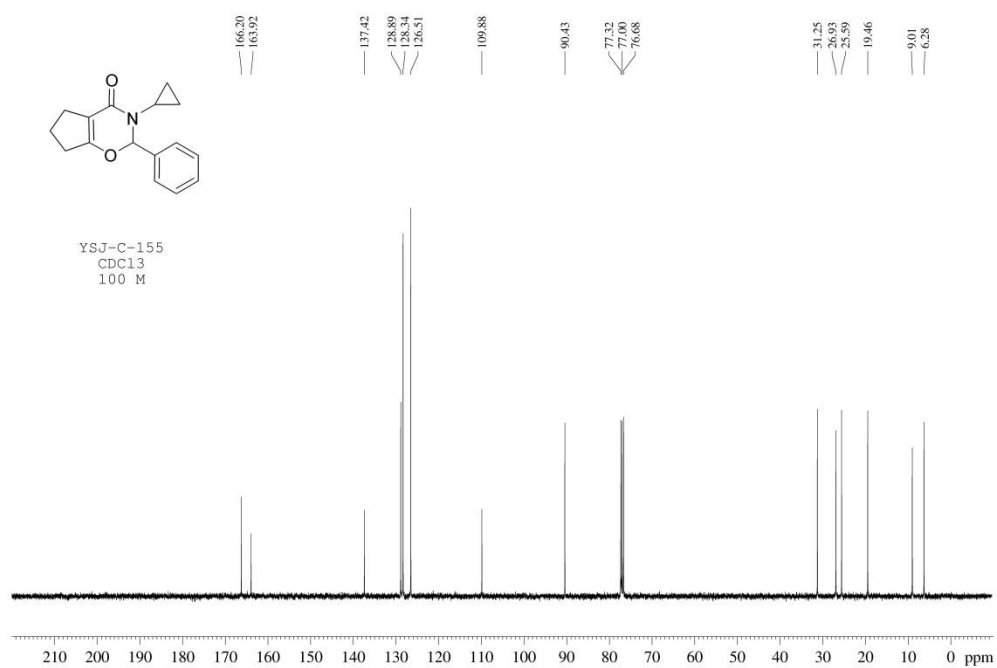



# <sup>1</sup>H and <sup>13</sup>C NMR spectra of compound 7d

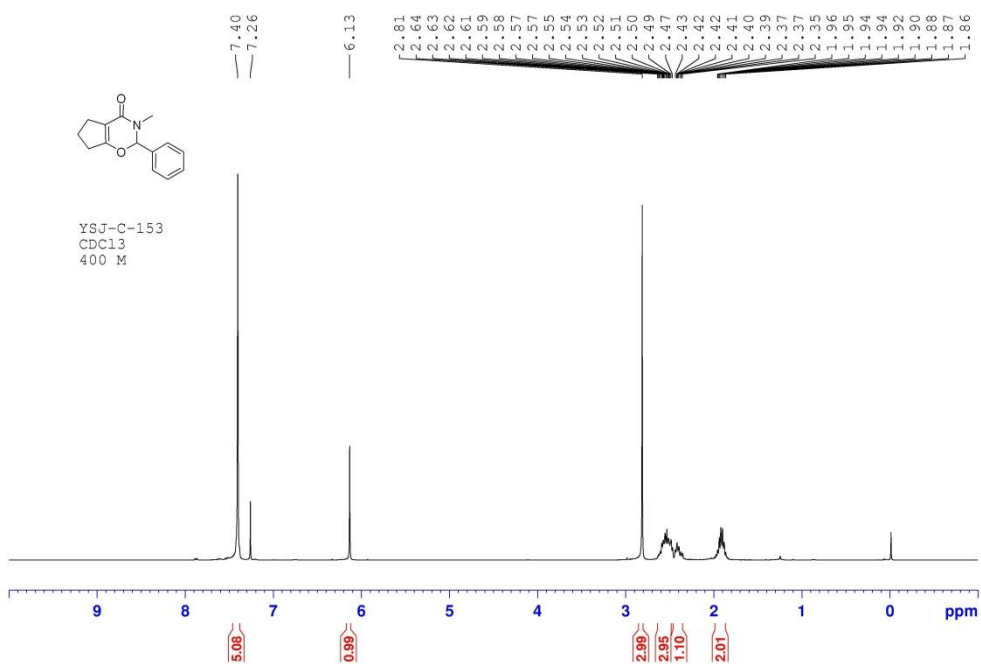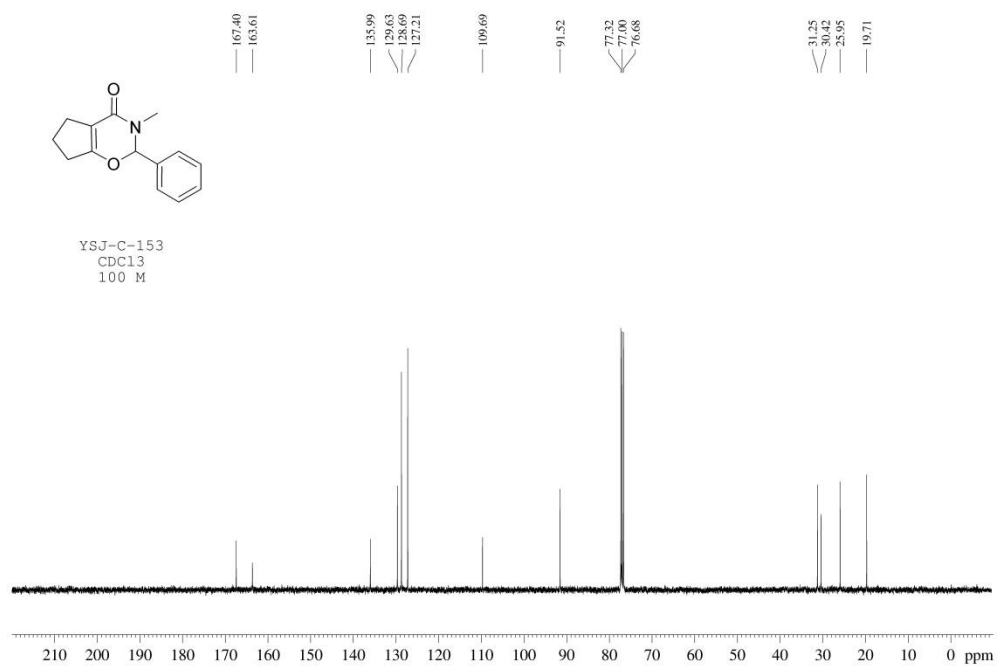



# <sup>1</sup>H and <sup>13</sup>C NMR spectra of compound 7f

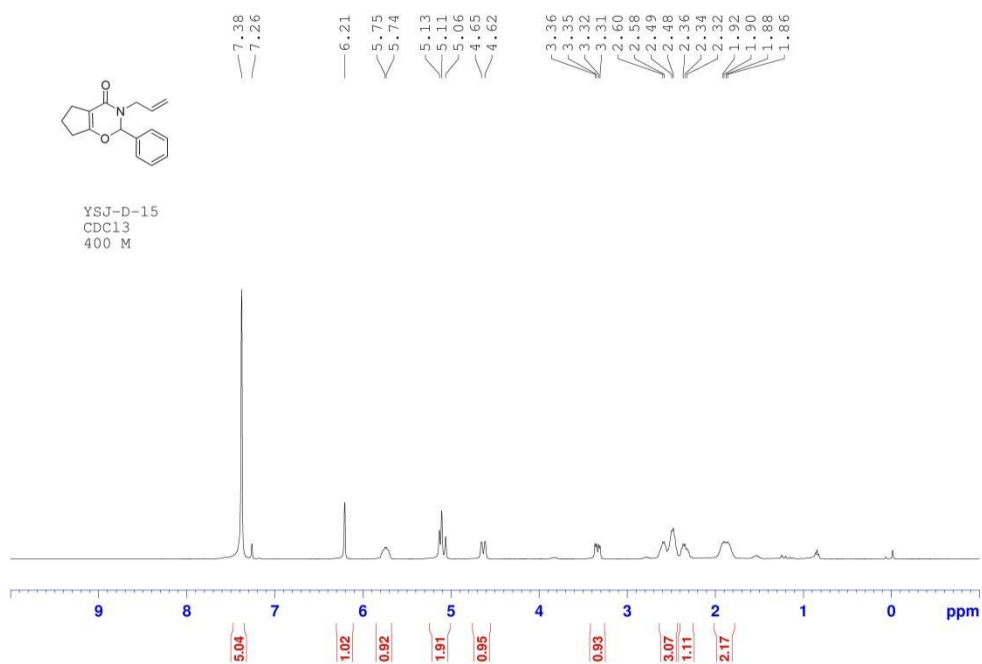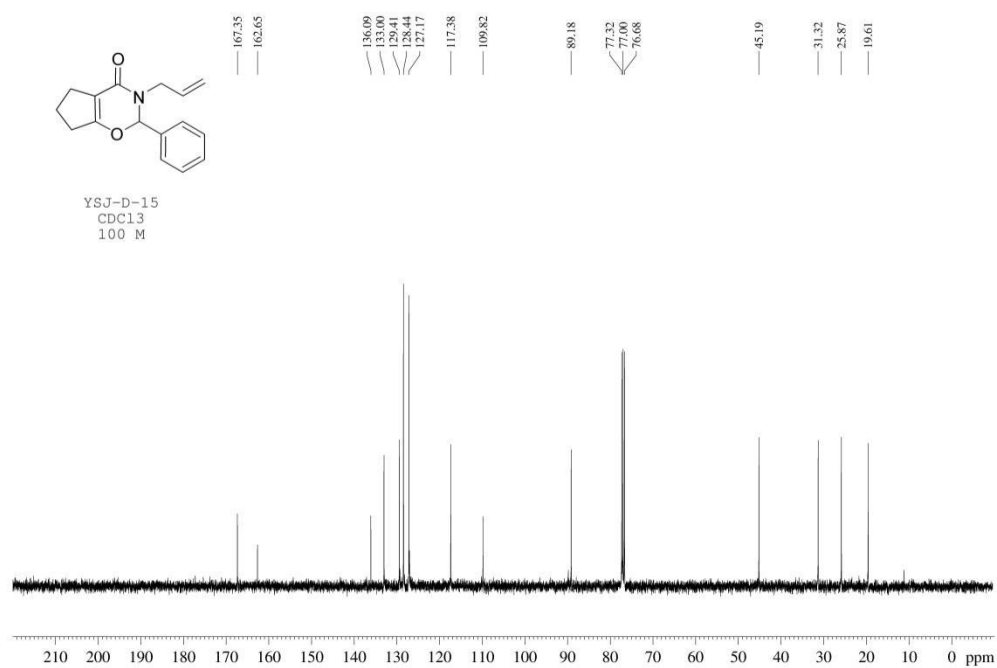

# <sup>1</sup>H and <sup>13</sup>C NMR spectra of compound 7g

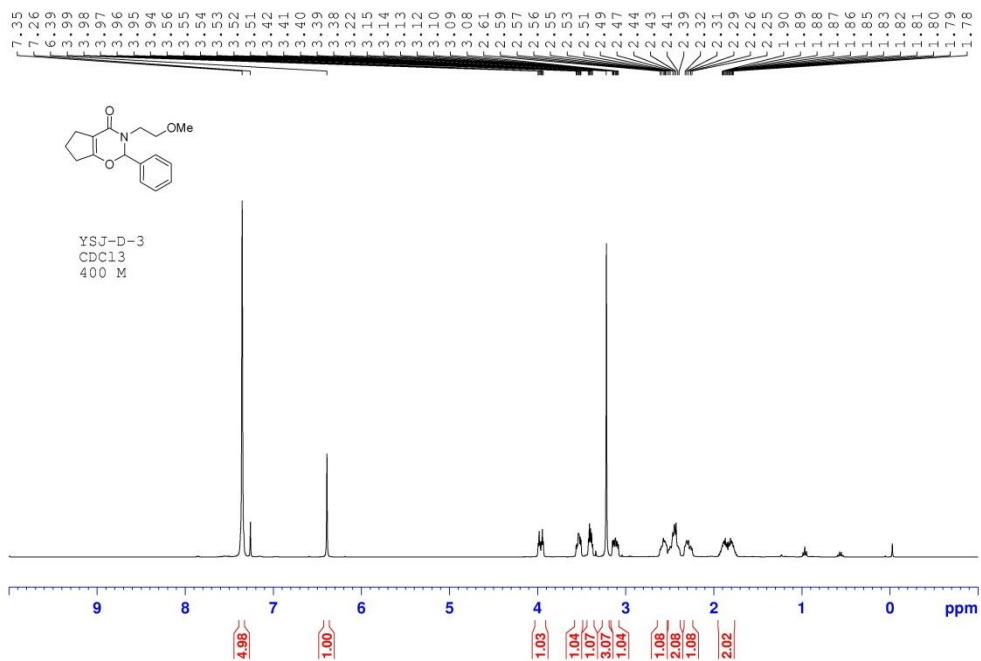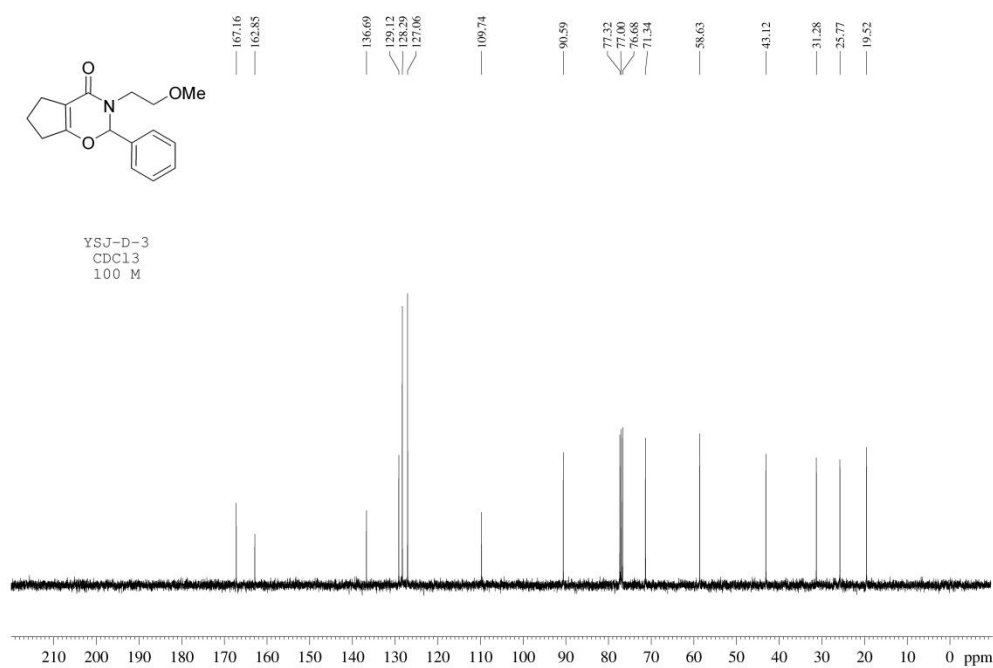

# $^1\text{H}$ and $^{13}\text{C}$ NMR spectra of compound 7h

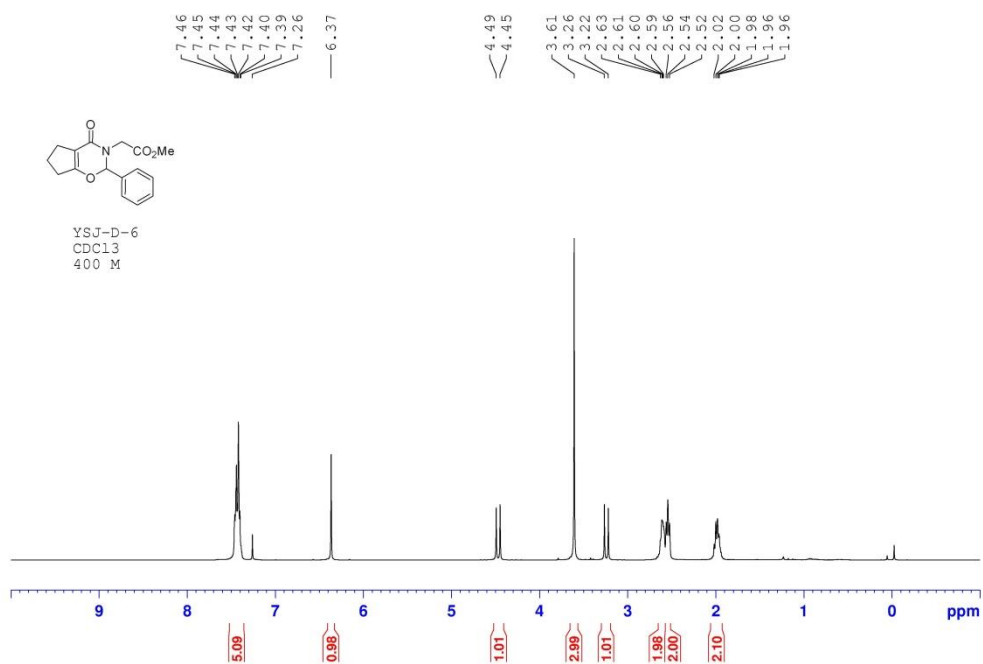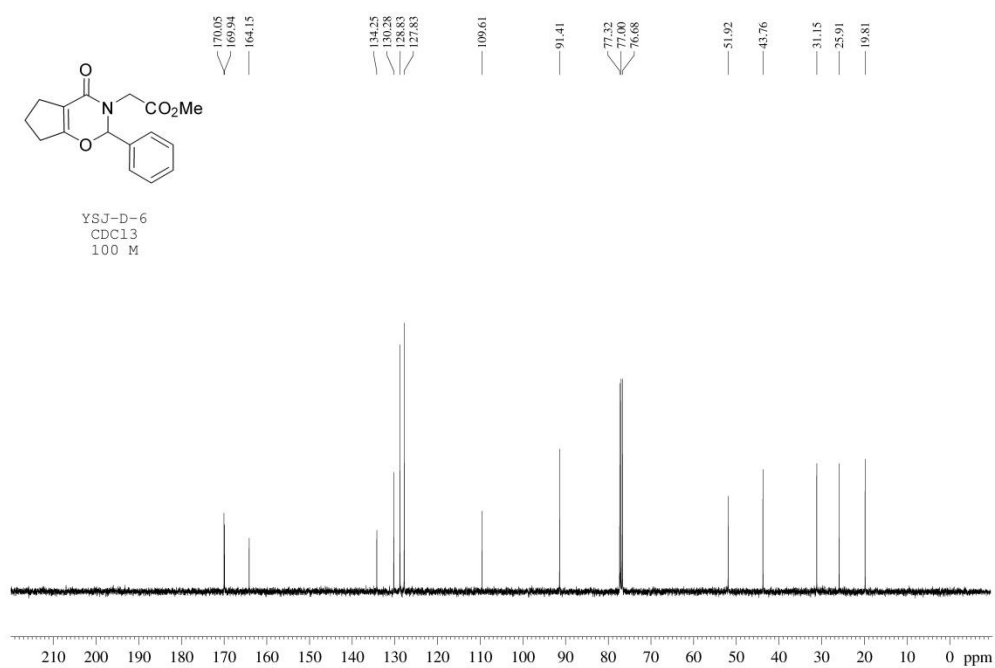



# $^1\text{H}$ and $^{13}\text{C}$ NMR spectra of compound 7i

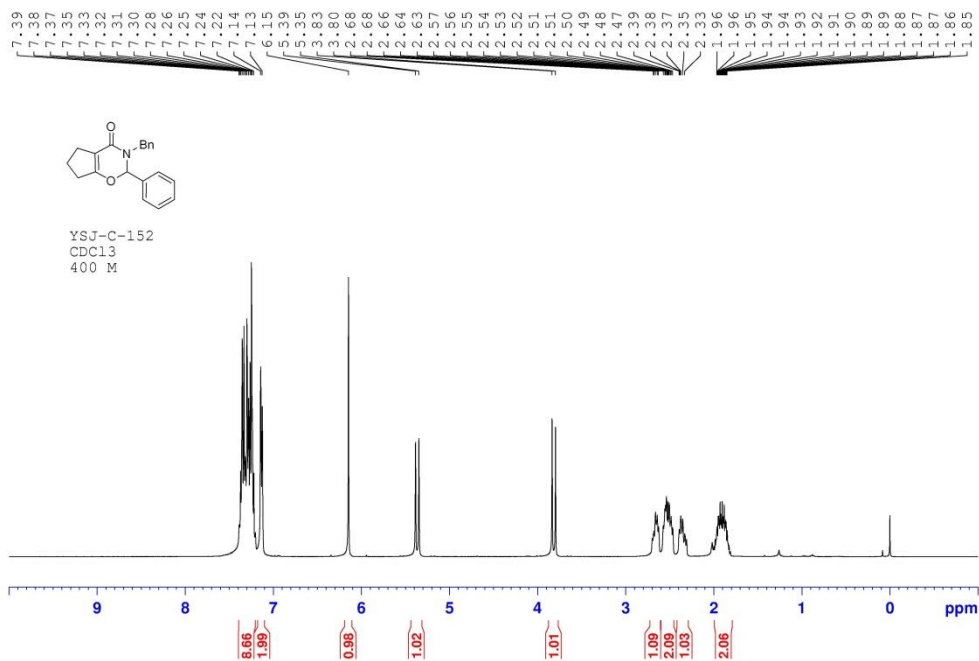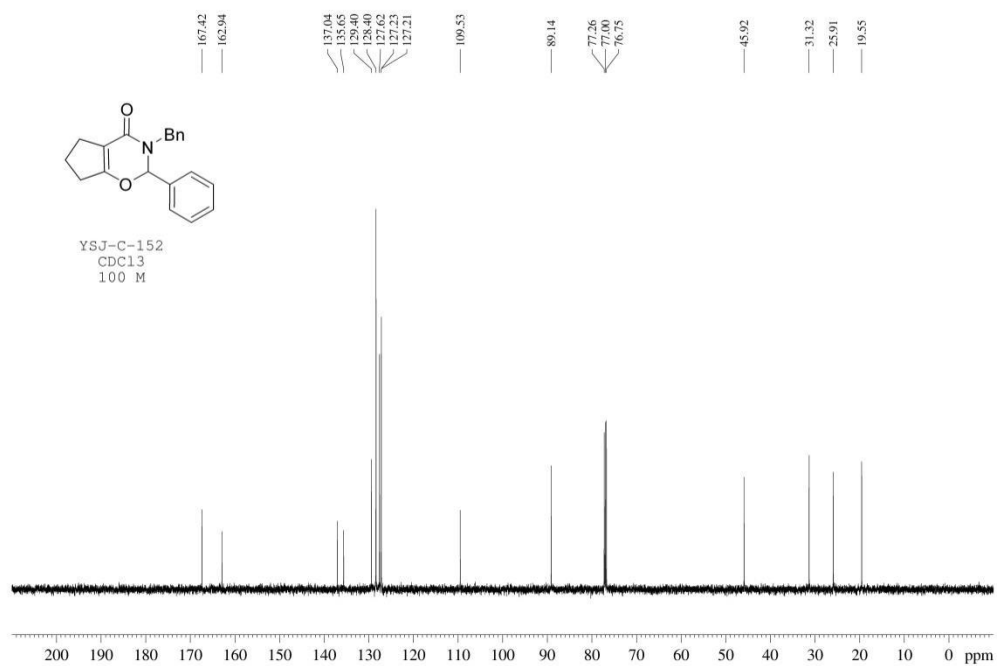

# <sup>1</sup>H and <sup>13</sup>C NMR spectra of compound 7j

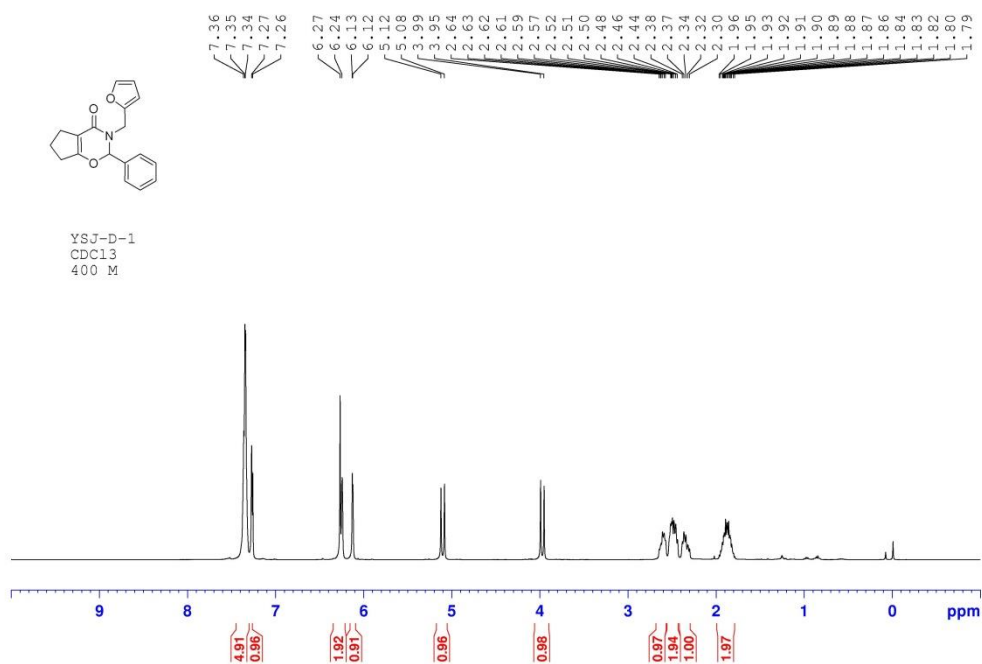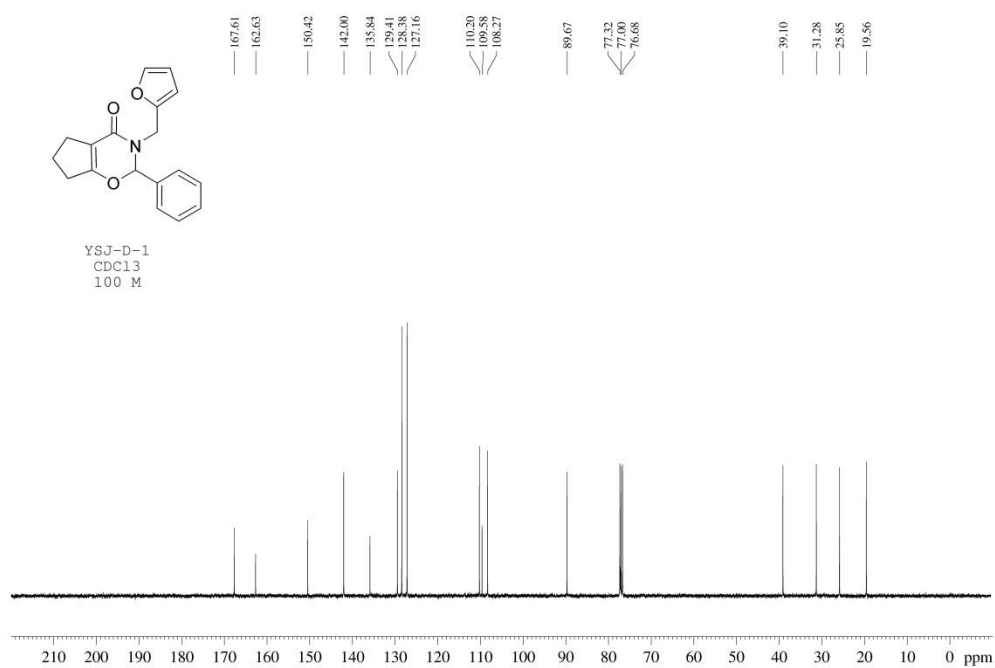

# <sup>1</sup>H and <sup>13</sup>C NMR spectra of compound 7k

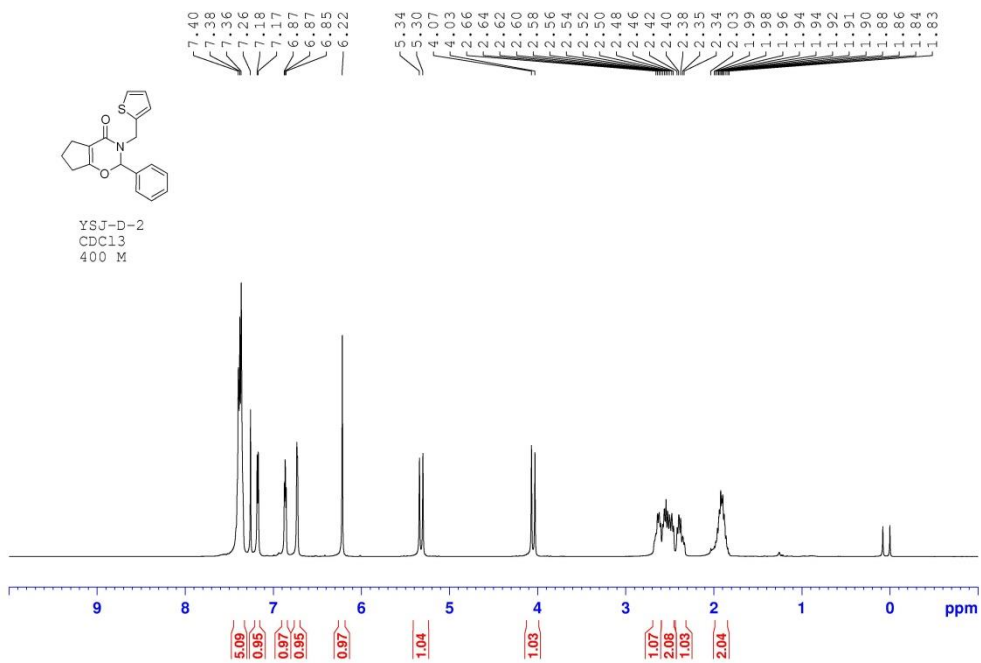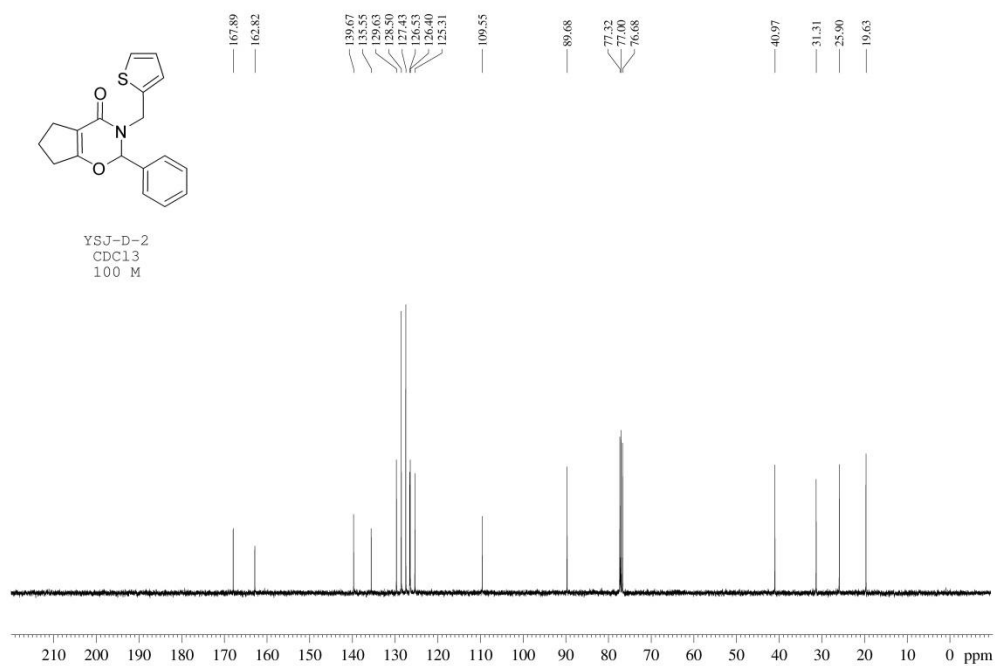

# $^1\text{H}$ and $^{13}\text{C}$ NMR spectra of compound 71

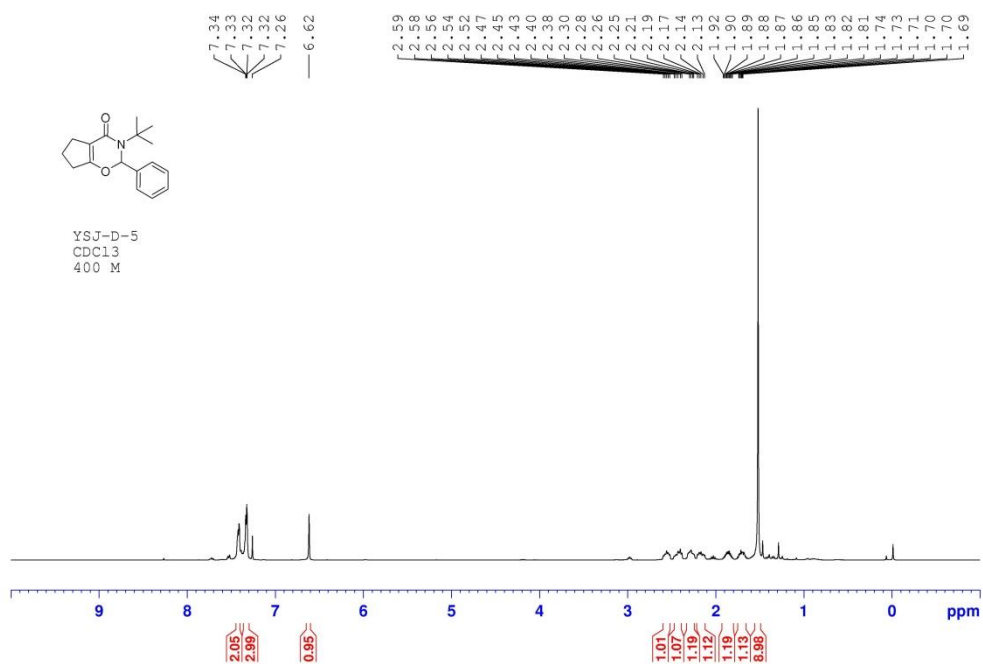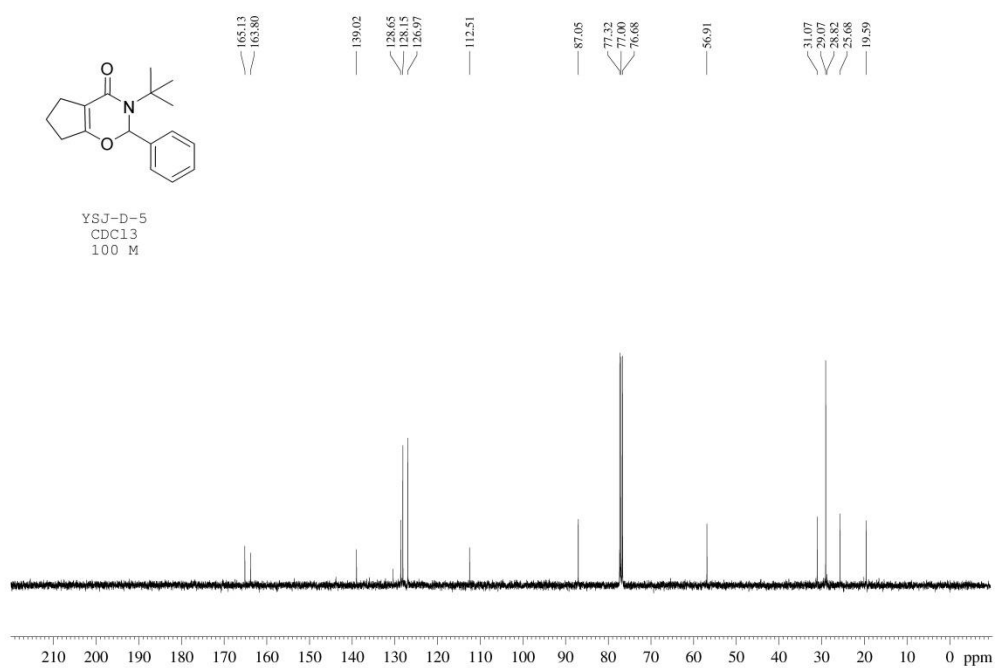

# <sup>1</sup>H and <sup>13</sup>C NMR spectra of compound 7m

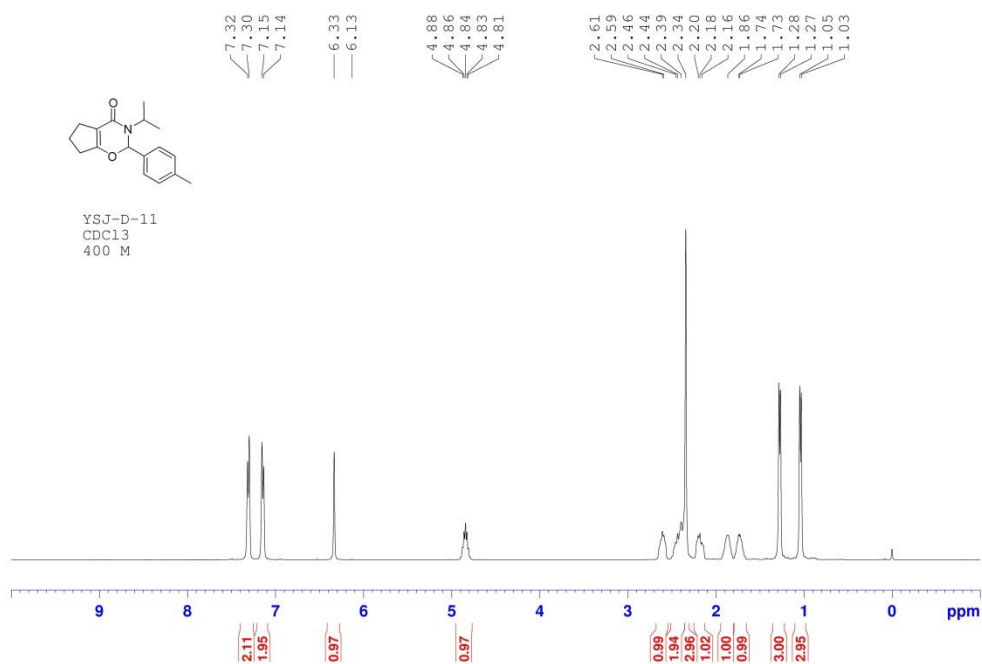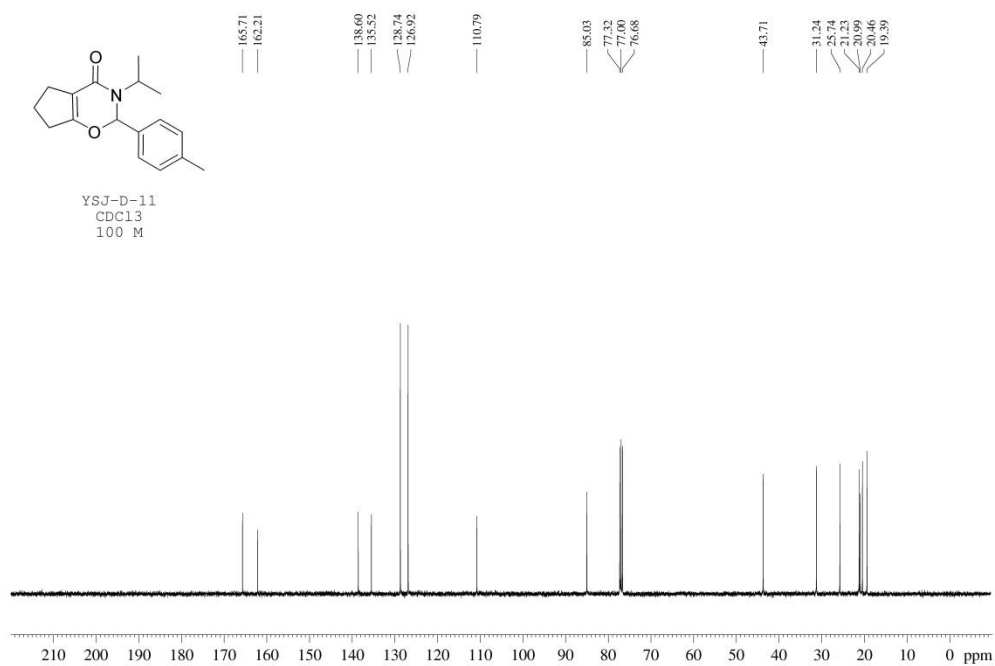

# <sup>1</sup>H and <sup>13</sup>C NMR spectra of compound 7n

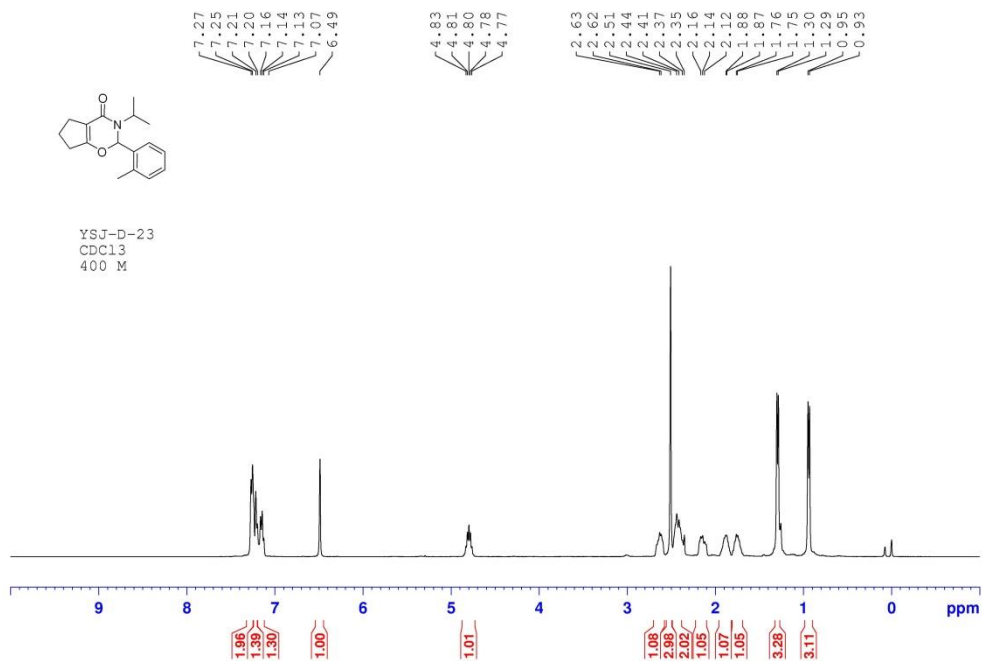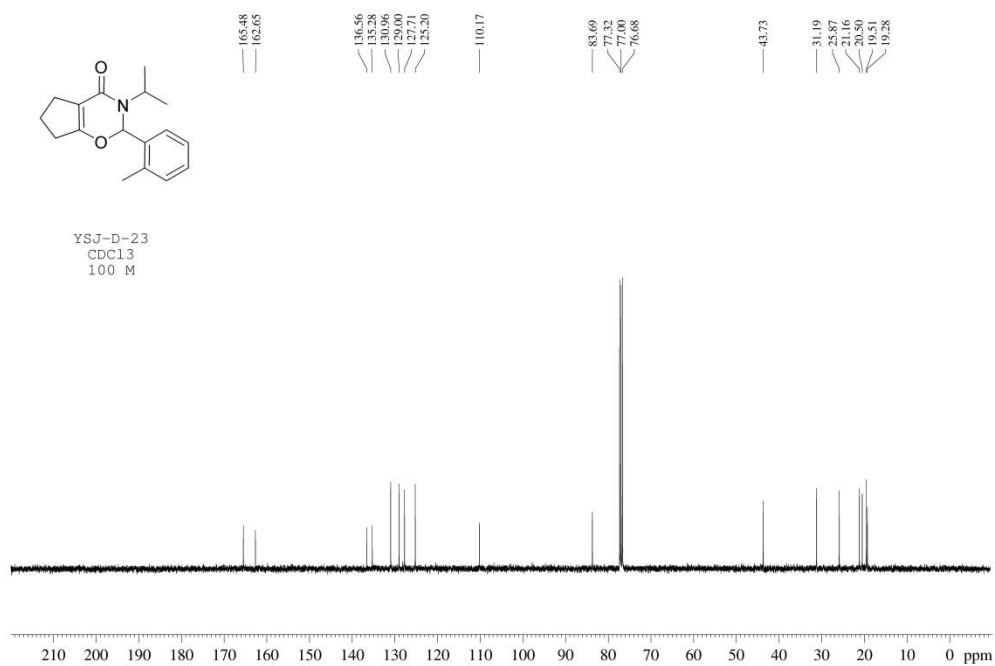

# $^1\text{H}$ and $^{13}\text{C}$ NMR spectra of compound 7o

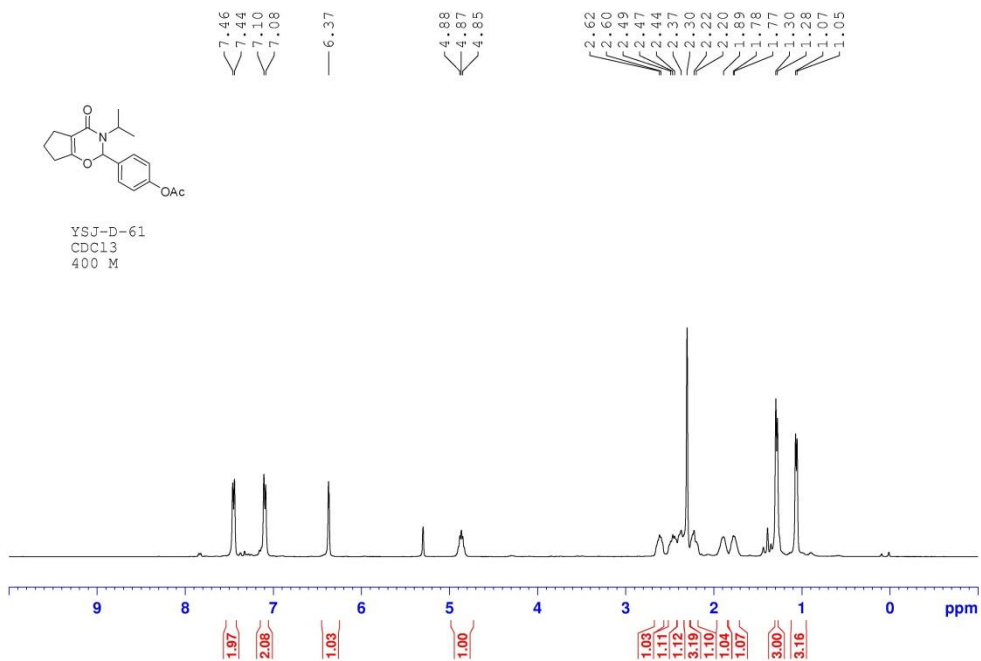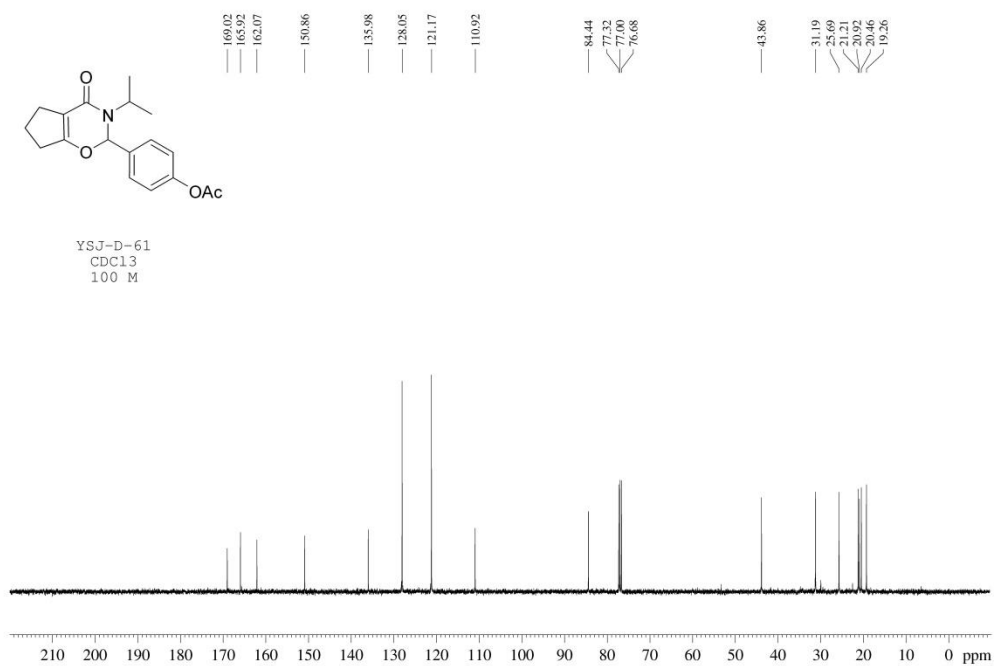

# $^1\text{H}$ and $^{13}\text{C}$ NMR spectra of compound 7p

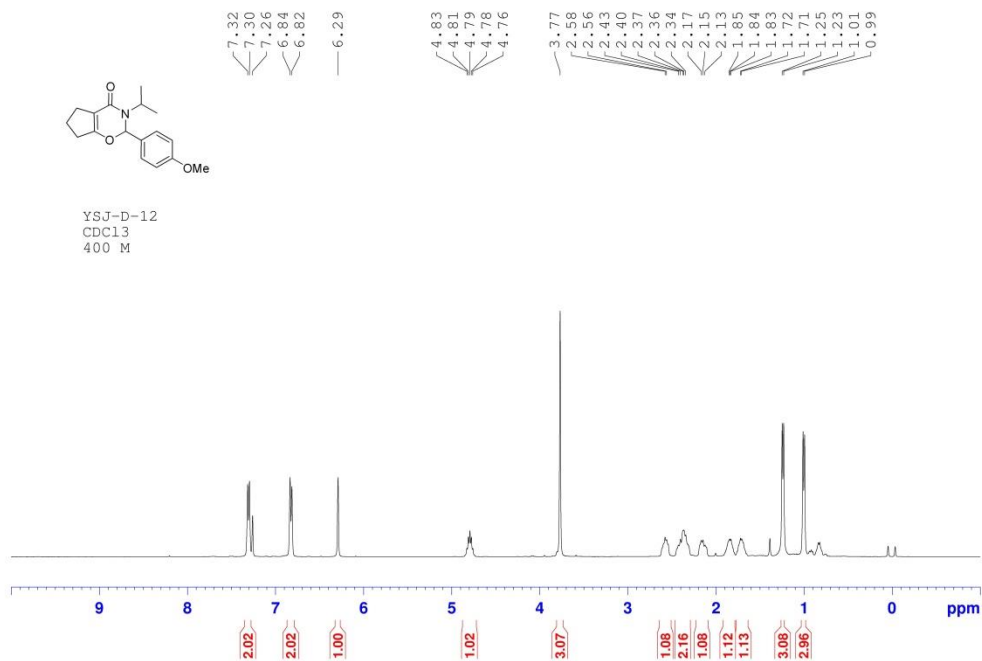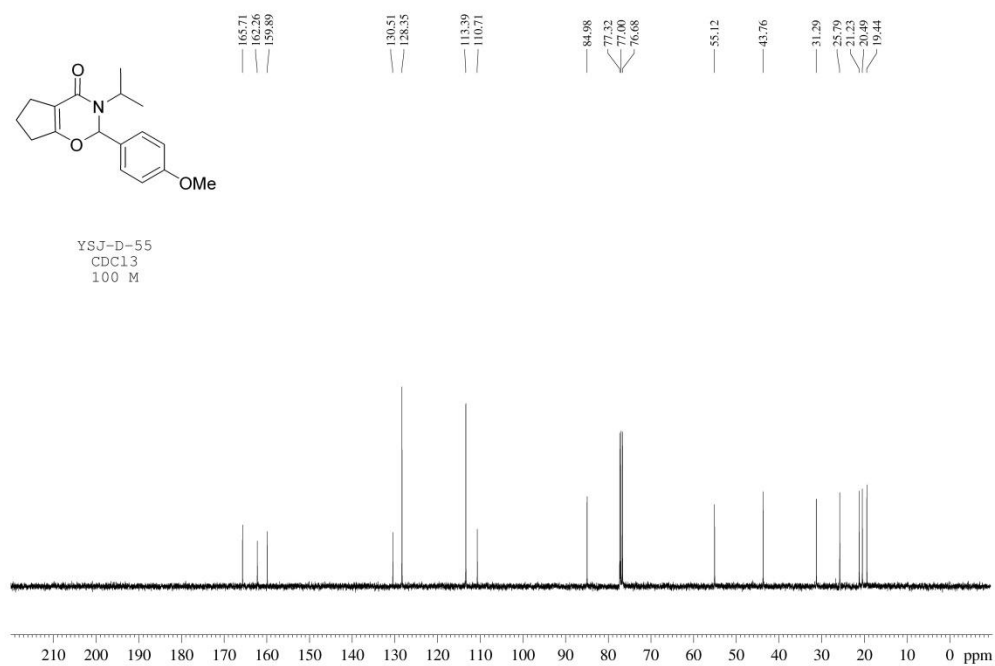



# $^1\text{H}$ and $^{13}\text{C}$ NMR spectra of compound 7q

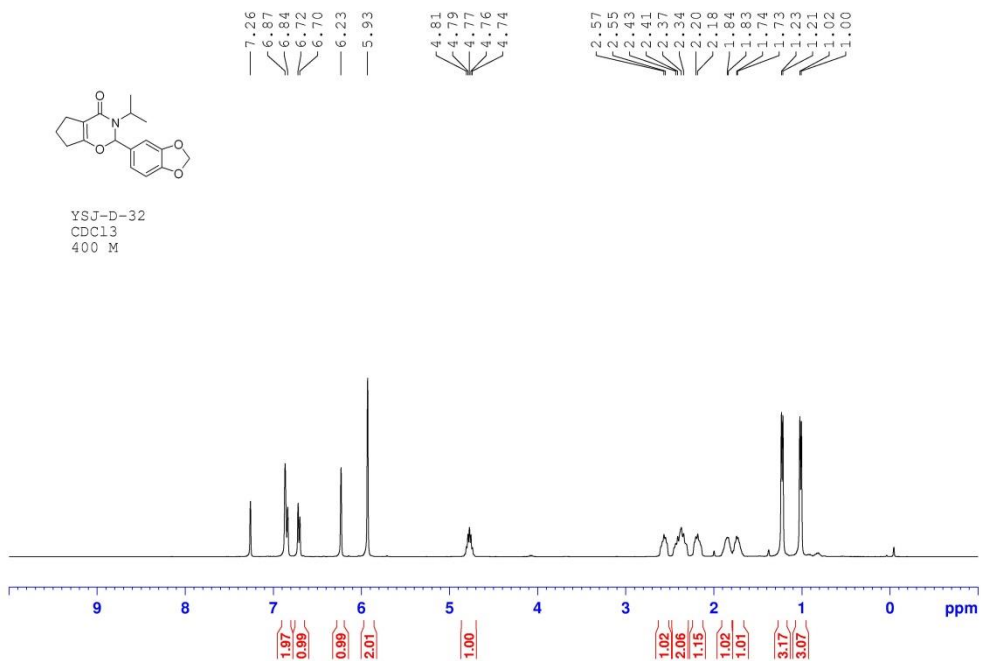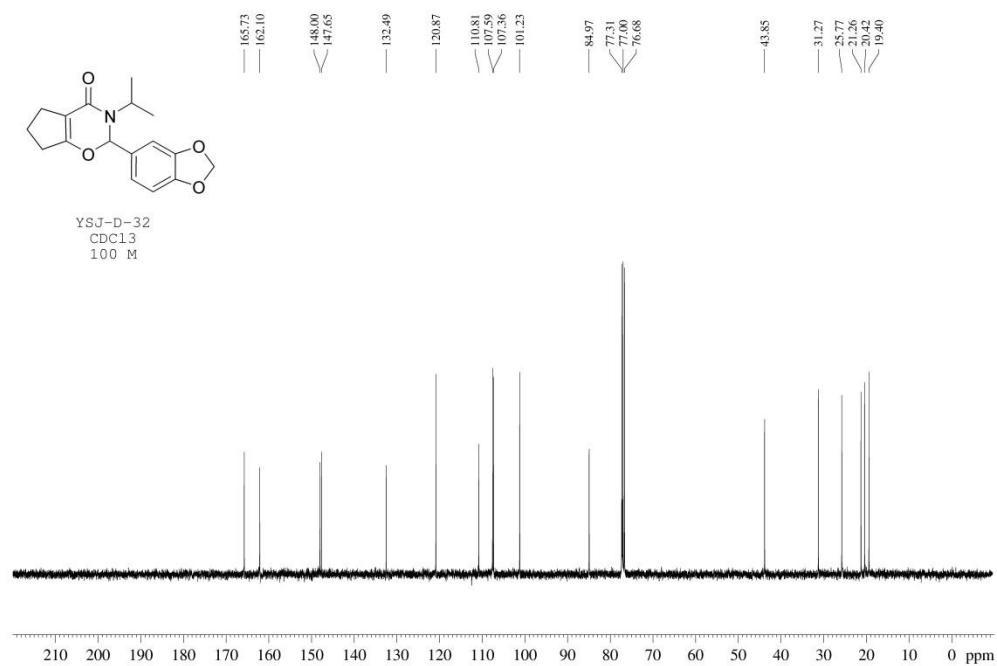

# $^1\text{H}$ and $^{13}\text{C}$ NMR spectra of compound 7r

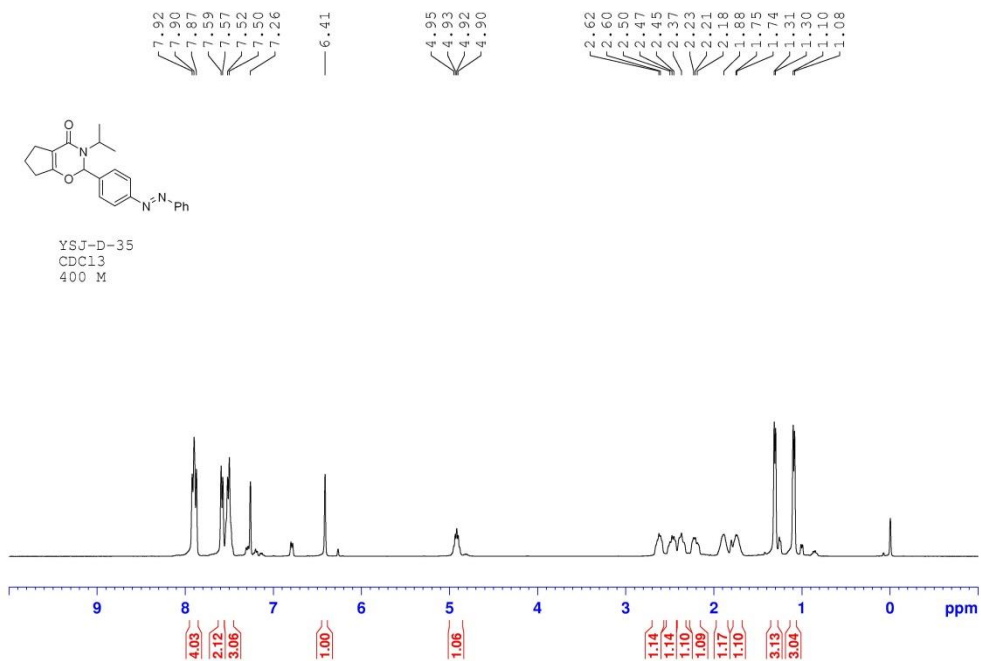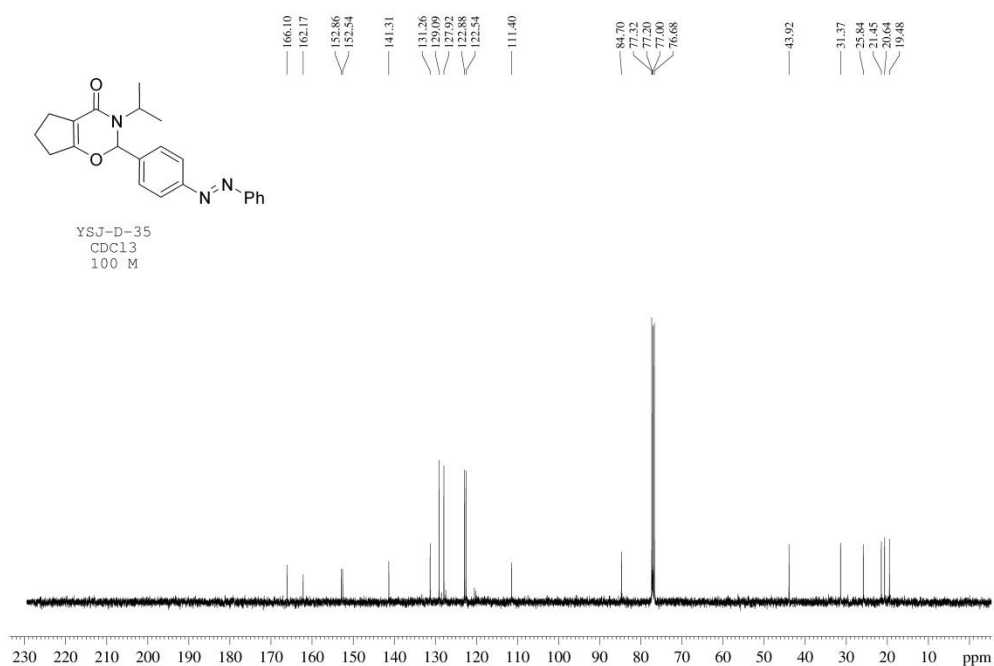

# <sup>1</sup>H and <sup>13</sup>C NMR spectra of compound 7s

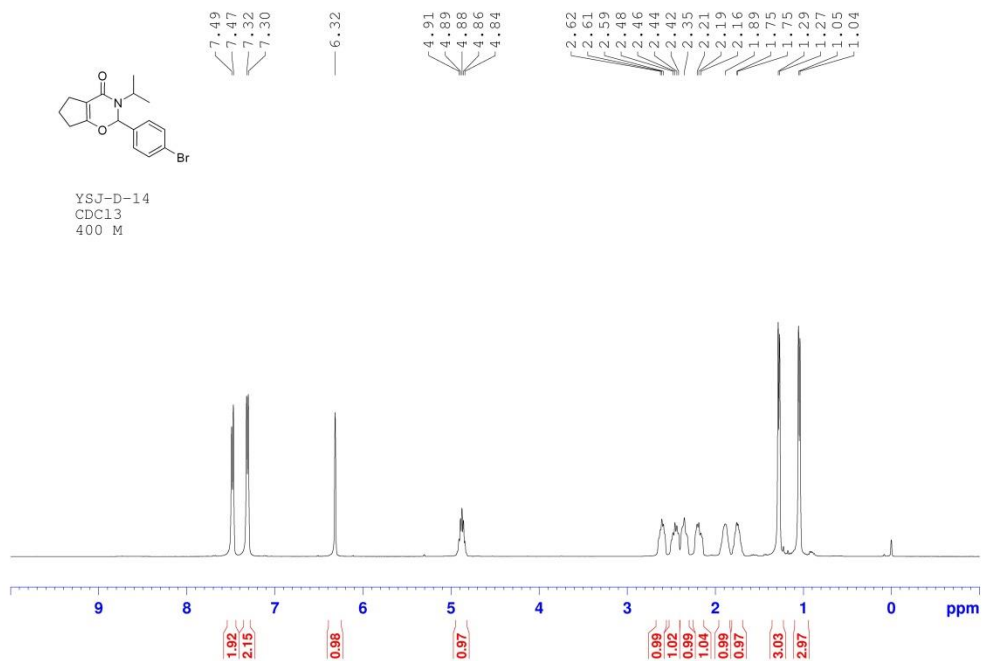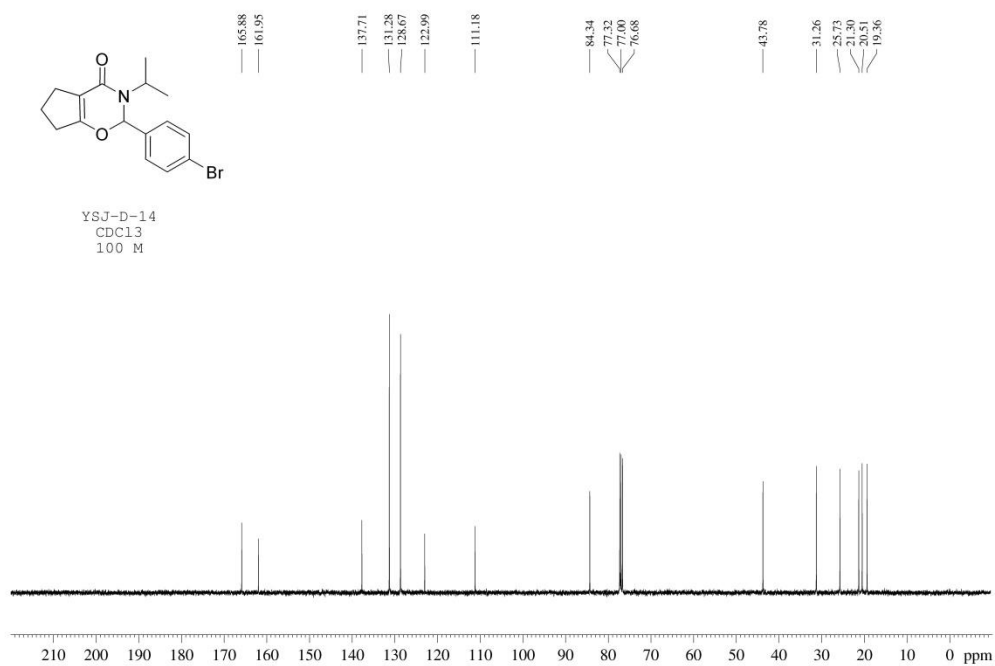

# <sup>1</sup>H and <sup>13</sup>C NMR spectra of compound 7t

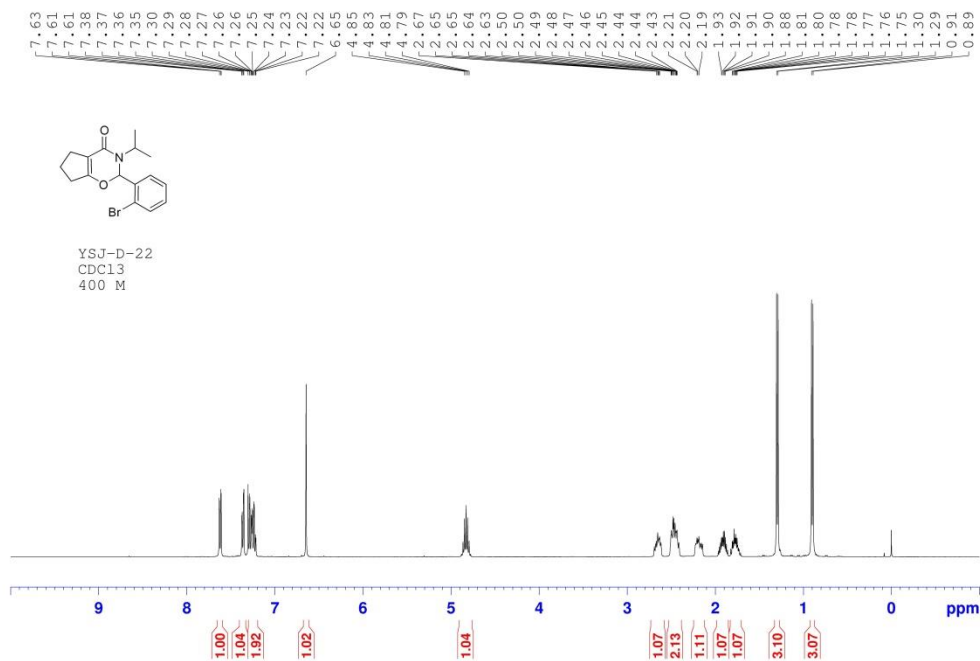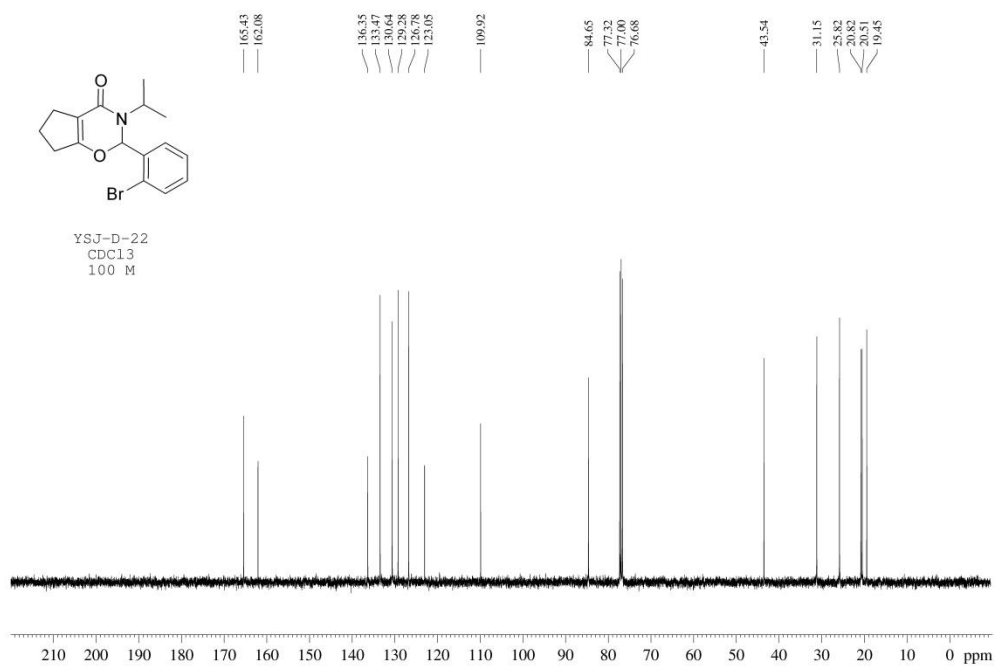

# <sup>1</sup>H and <sup>13</sup>C NMR spectra of compound 7u

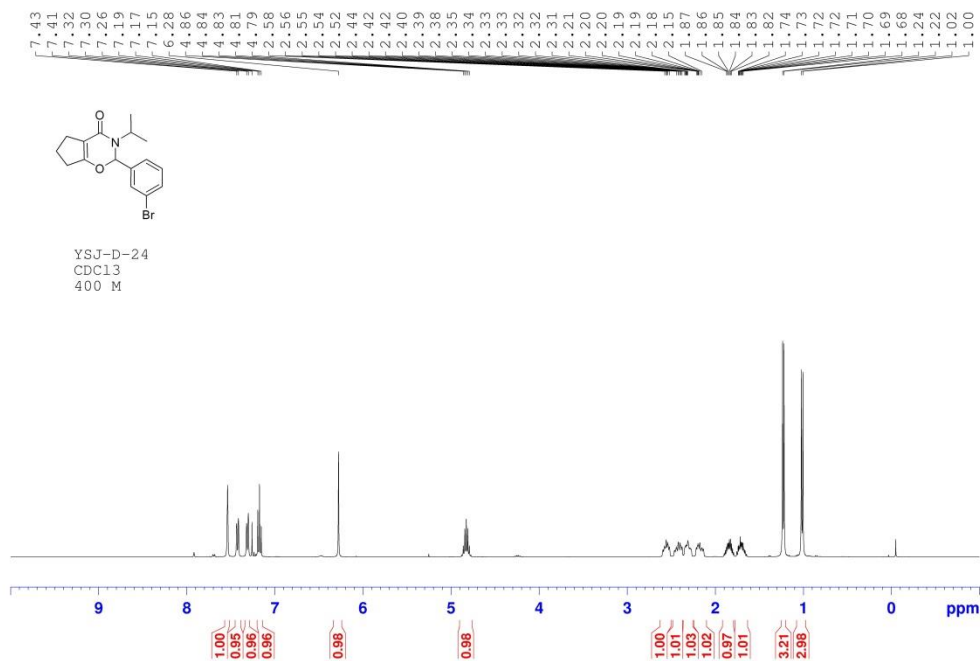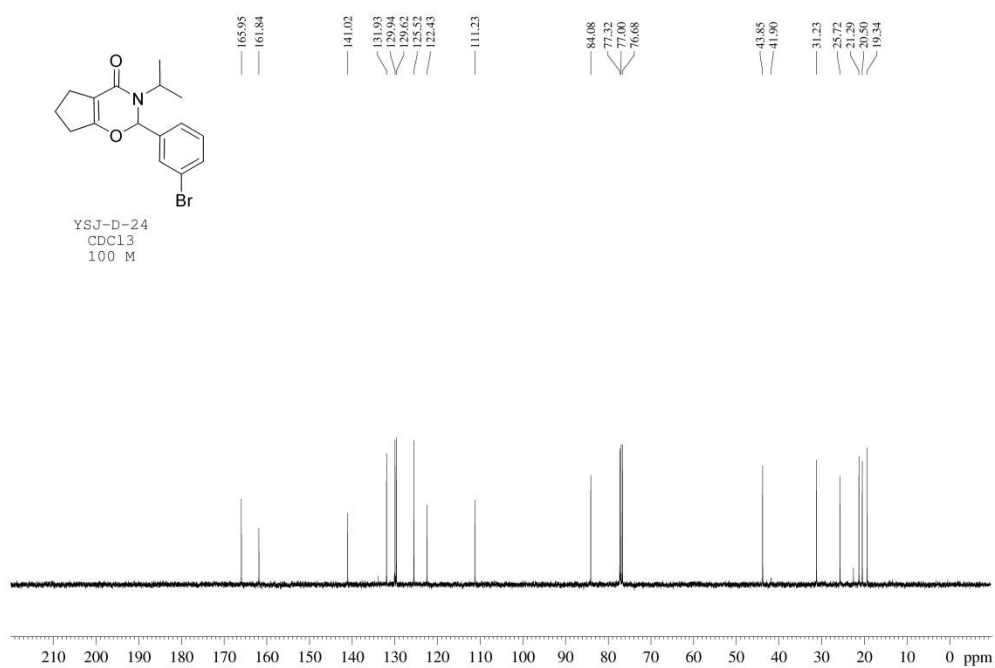

# <sup>1</sup>H and <sup>13</sup>C NMR spectra of compound 7v

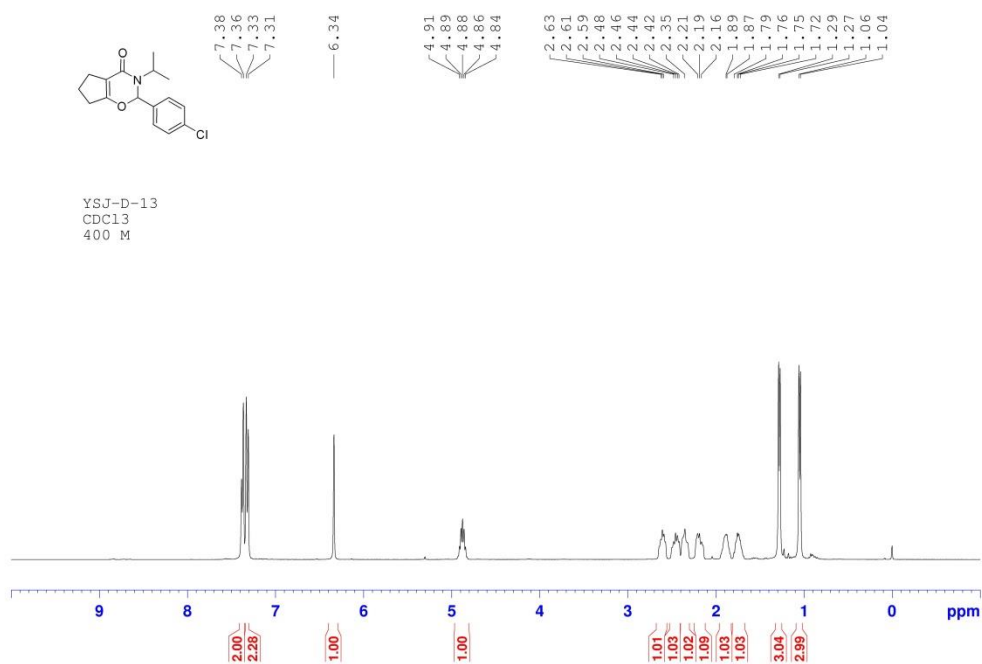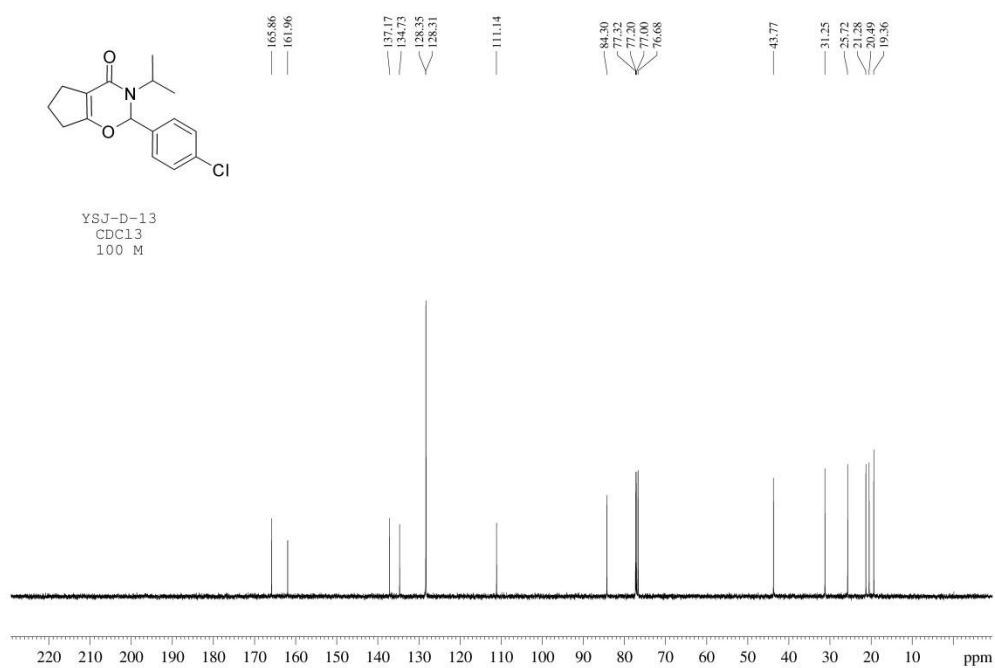

# <sup>1</sup>H and <sup>13</sup>C NMR spectra of compound 7w

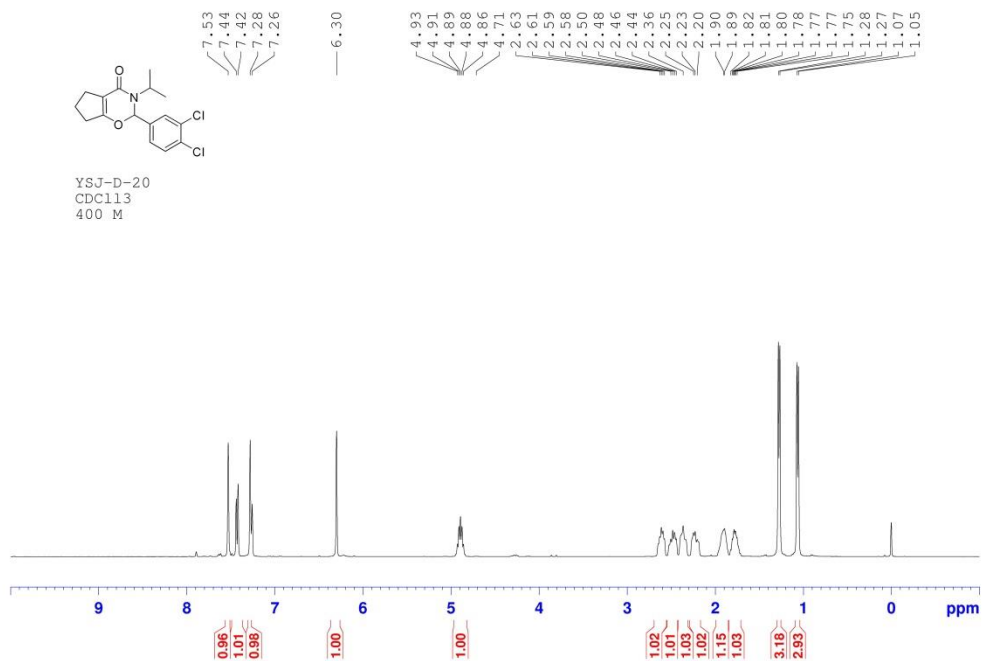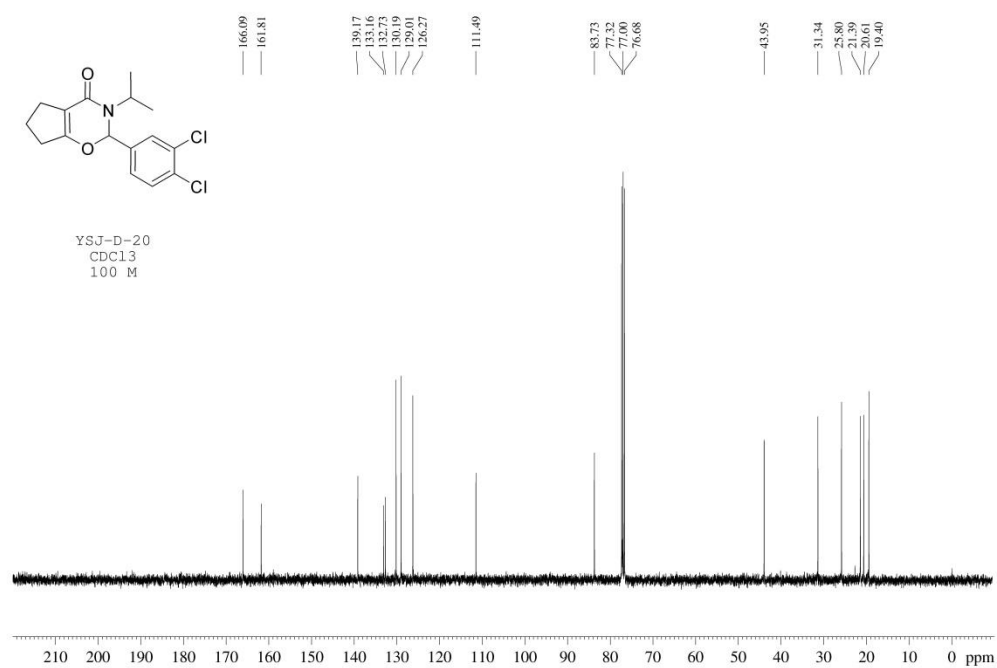

# $^1\text{H}$ and $^{13}\text{C}$ NMR spectra of compound 7x

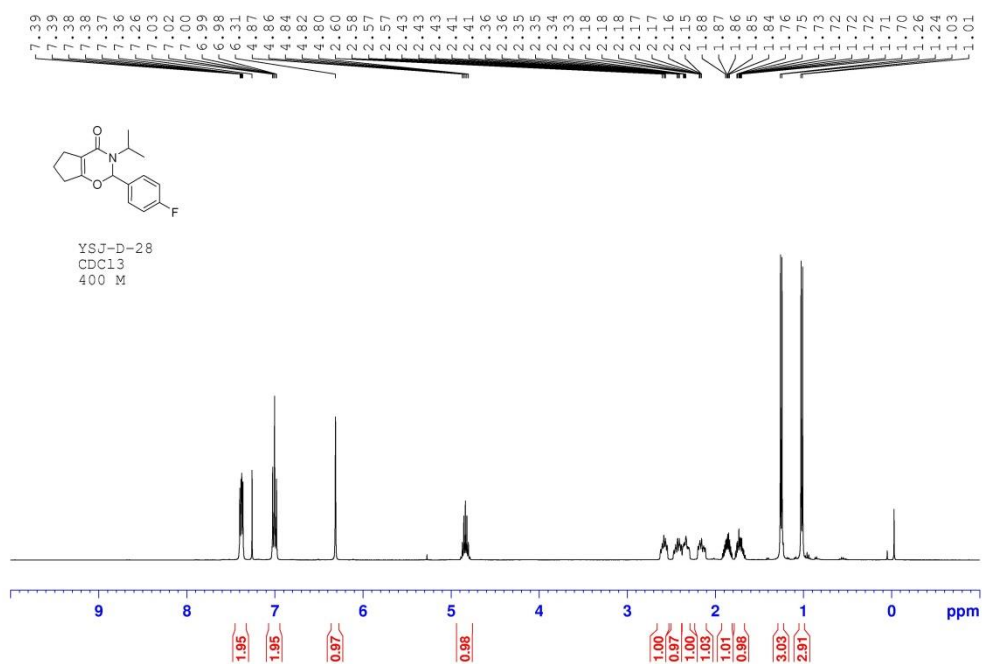



# $^1\text{H}$ and $^{13}\text{C}$ NMR spectra of compound 7y

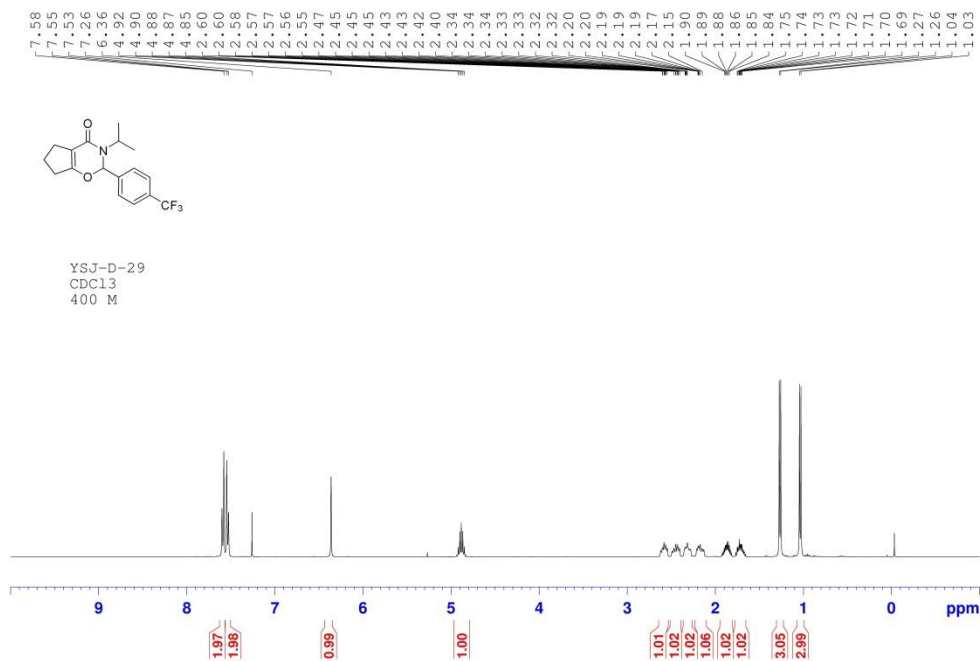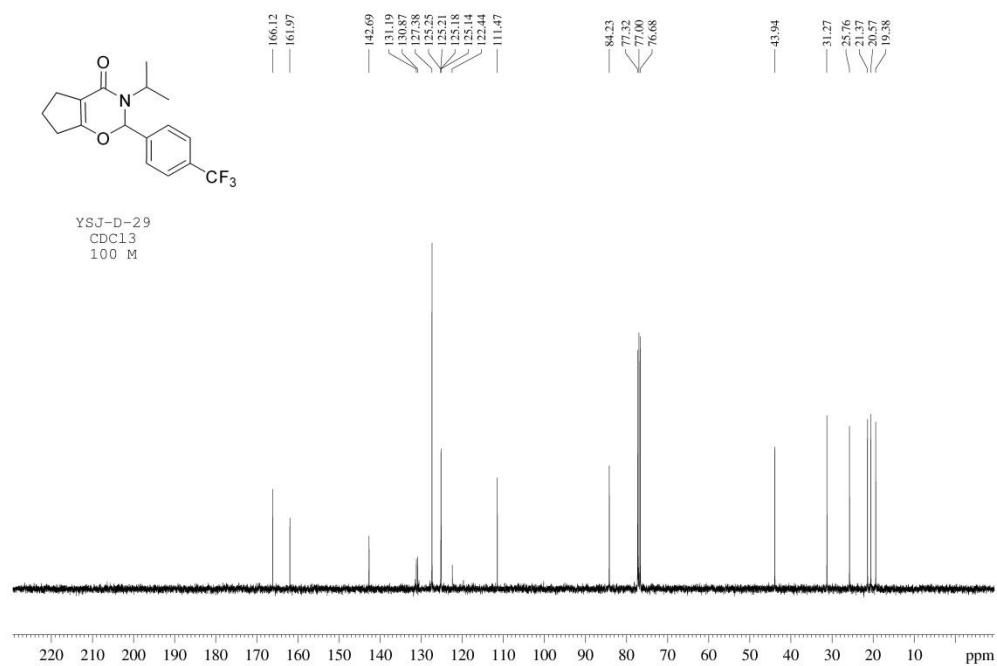

# <sup>1</sup>H and <sup>13</sup>C NMR spectra of compound 7z

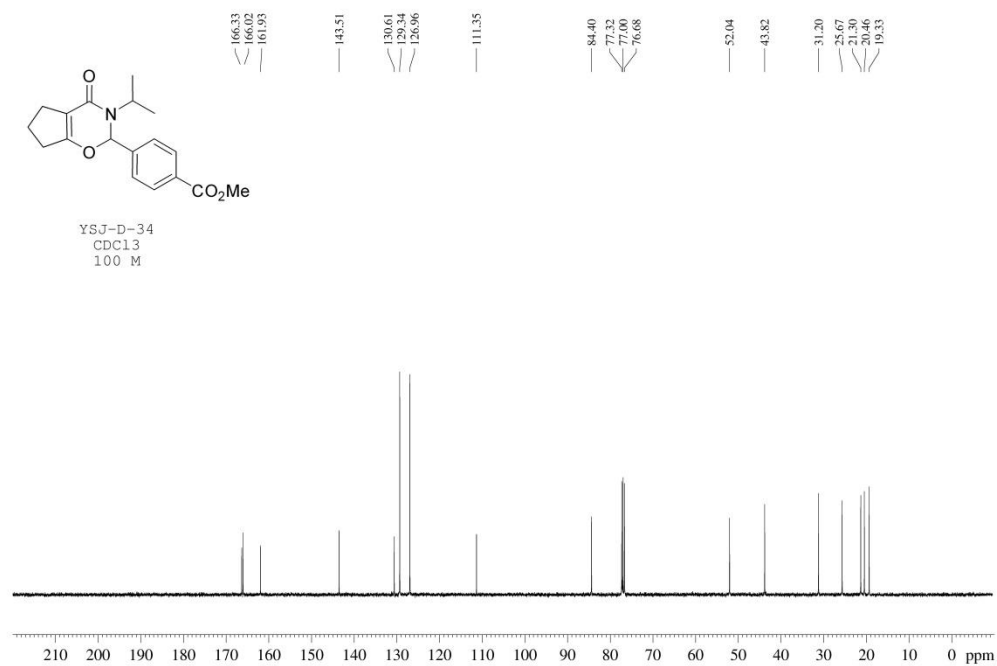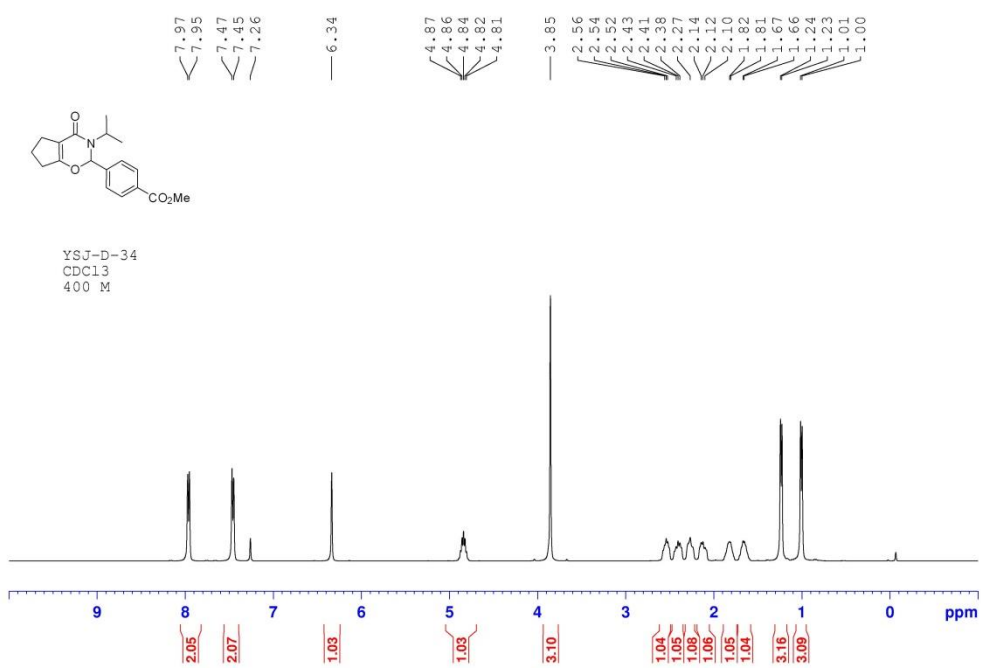

# $^1\text{H}$ and $^{13}\text{C}$ NMR spectra of compound 7aa

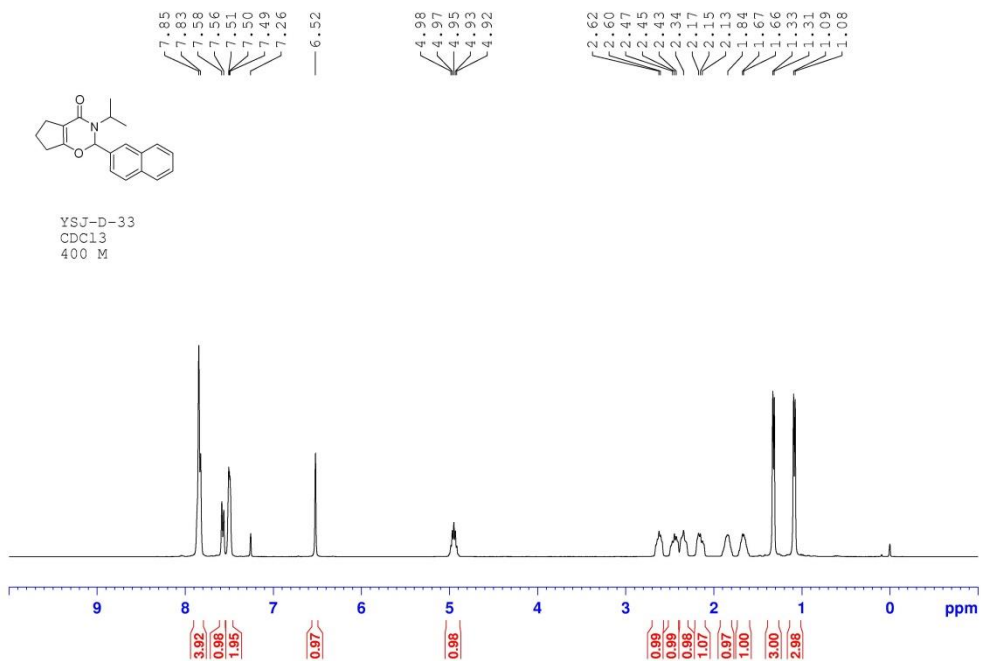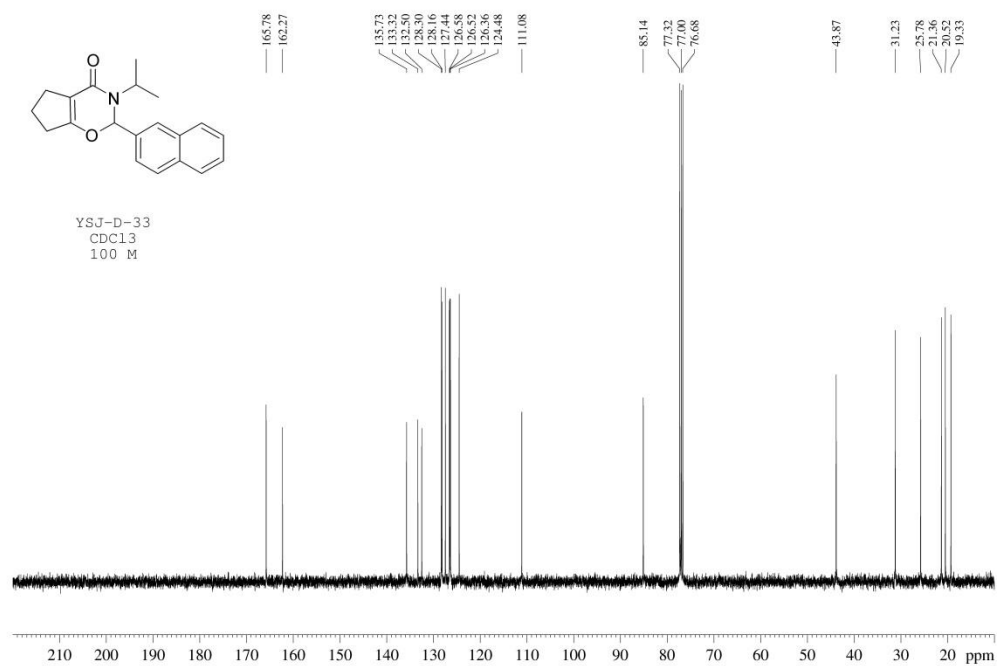

# $^1\text{H}$ and $^{13}\text{C}$ NMR spectra of compound 7ab

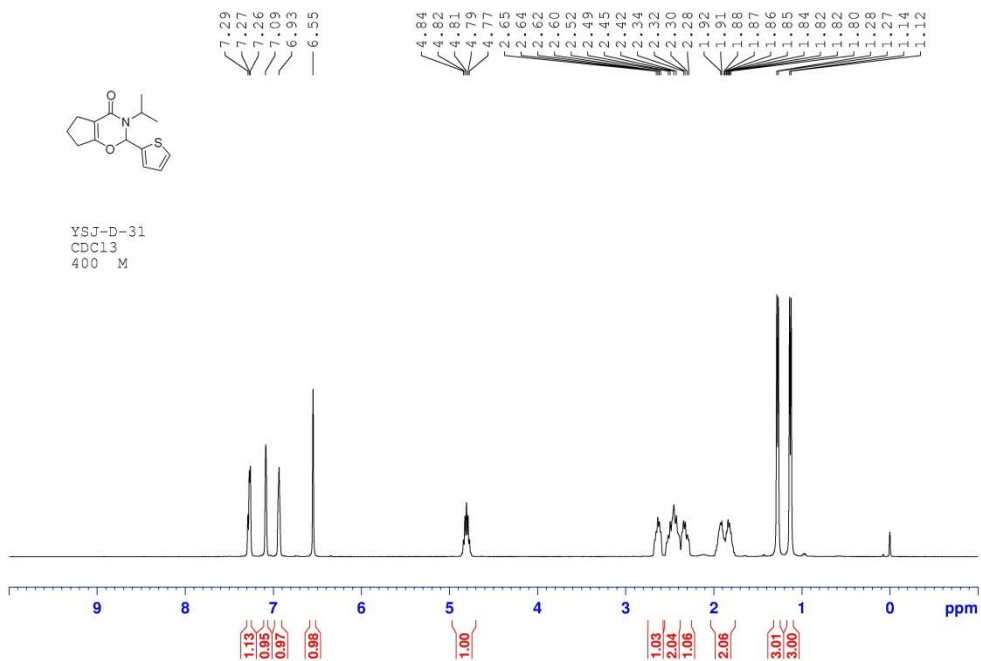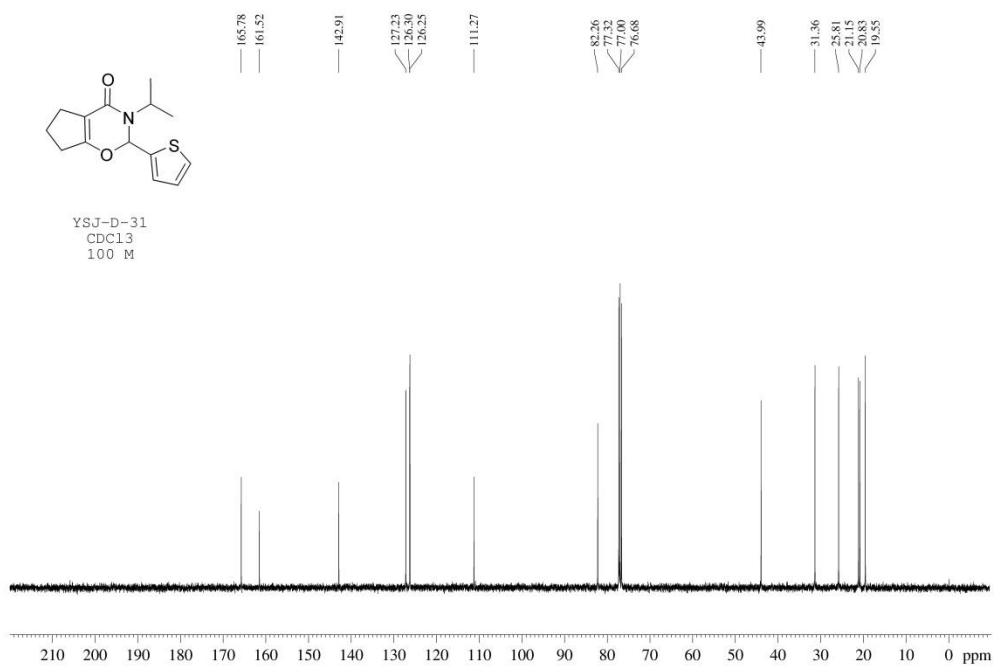

# $^1\text{H}$ and $^{13}\text{C}$ NMR spectra of compound 7ac

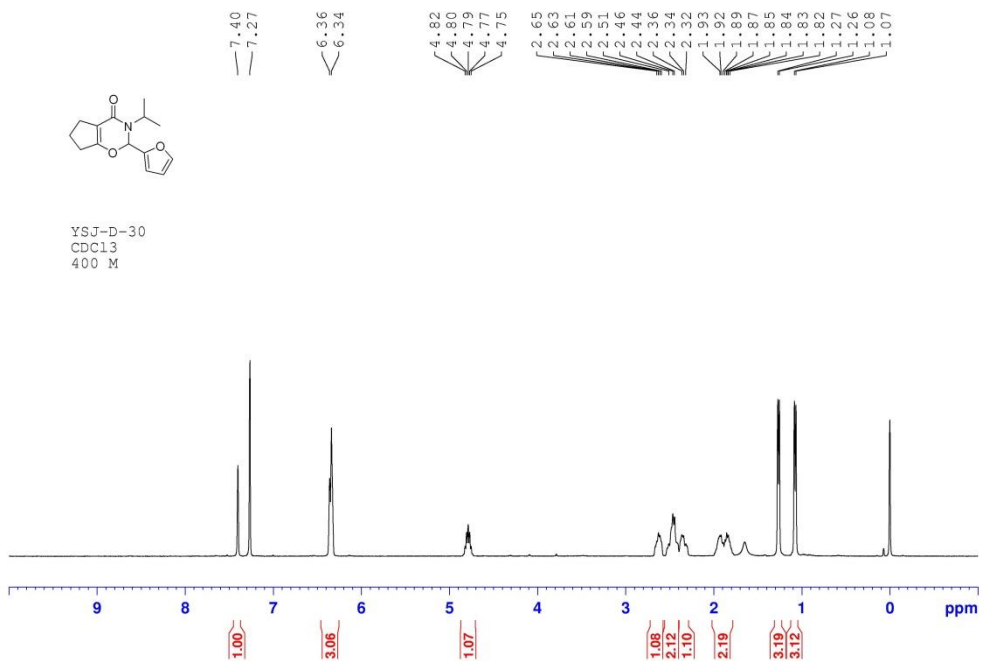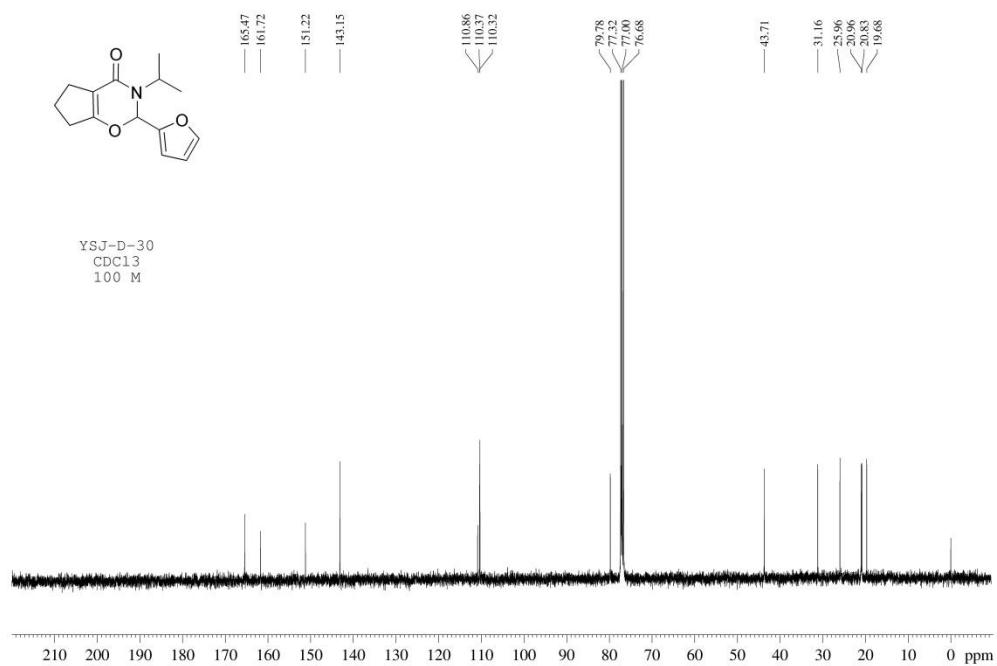

# $^1\text{H}$ and $^{13}\text{C}$ NMR spectra of compound 7ad

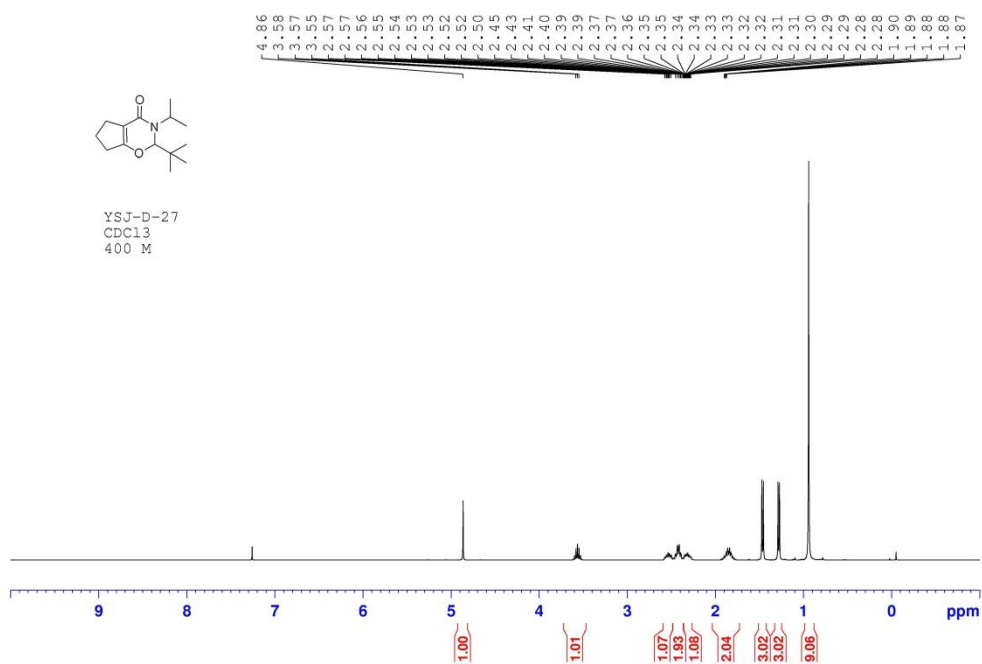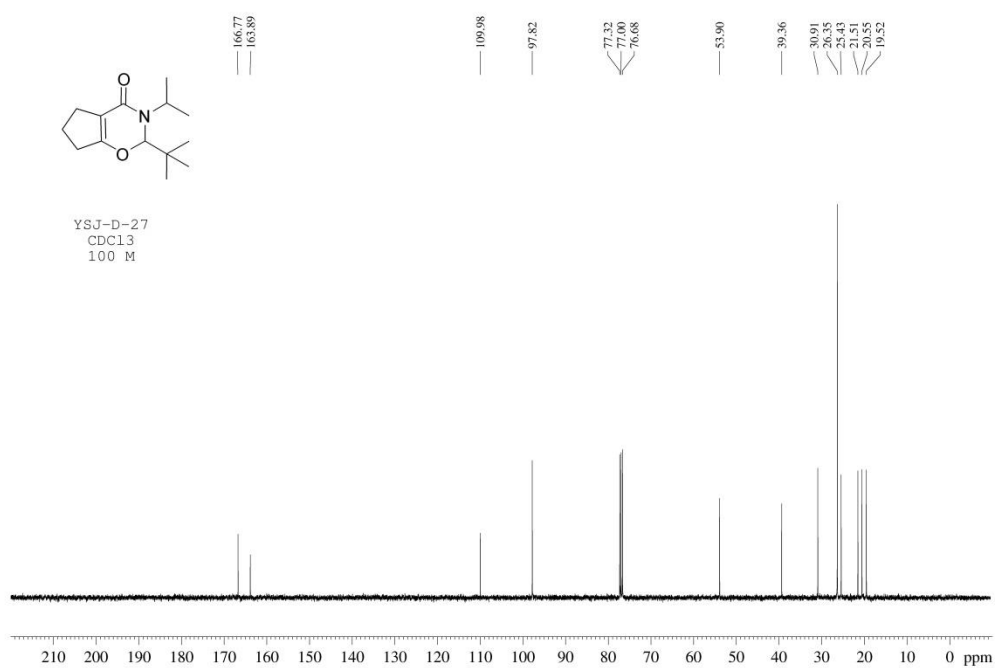

# $^1\text{H}$ and $^{13}\text{C}$ NMR spectra of compound 7ae

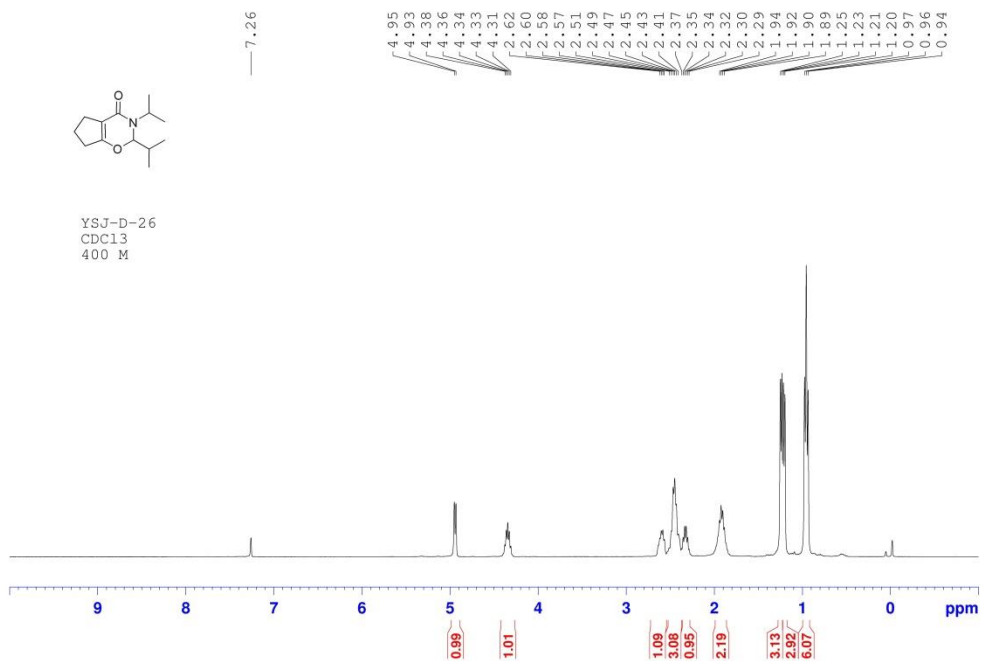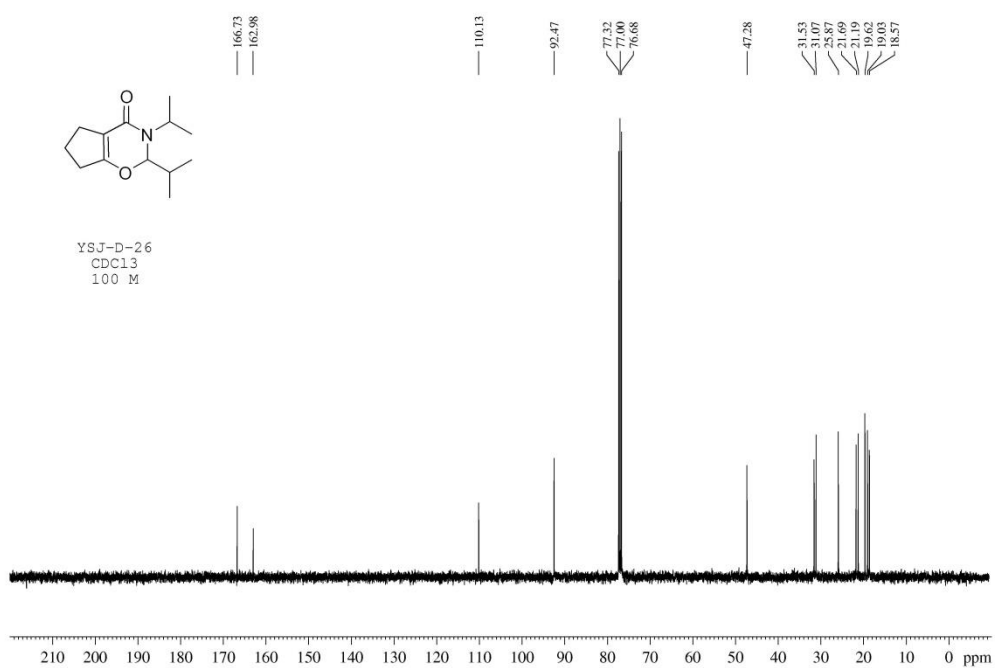

# <sup>1</sup>H and <sup>13</sup>C NMR spectra of compound 7af

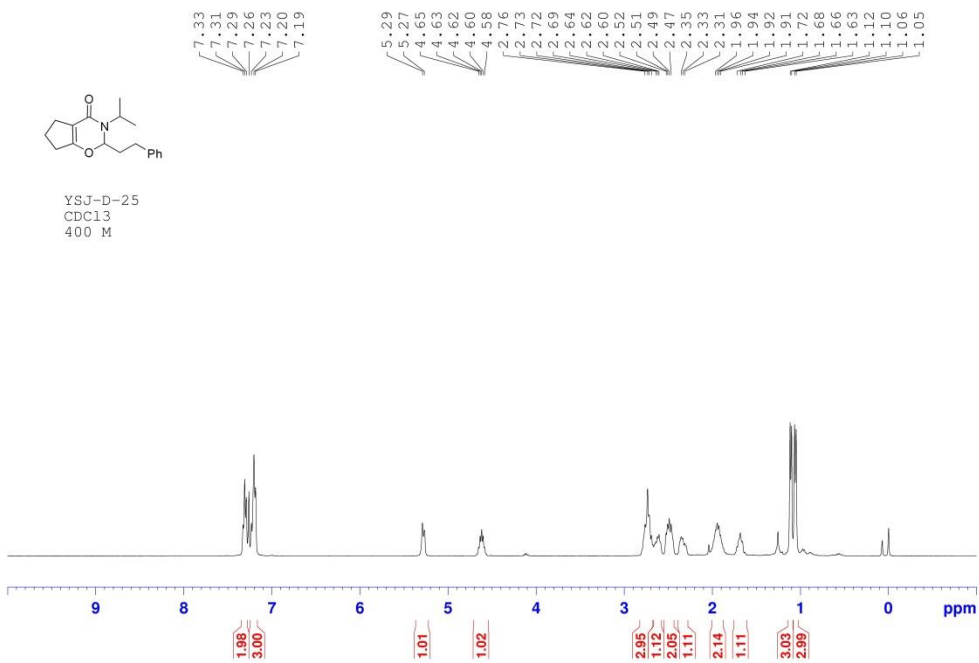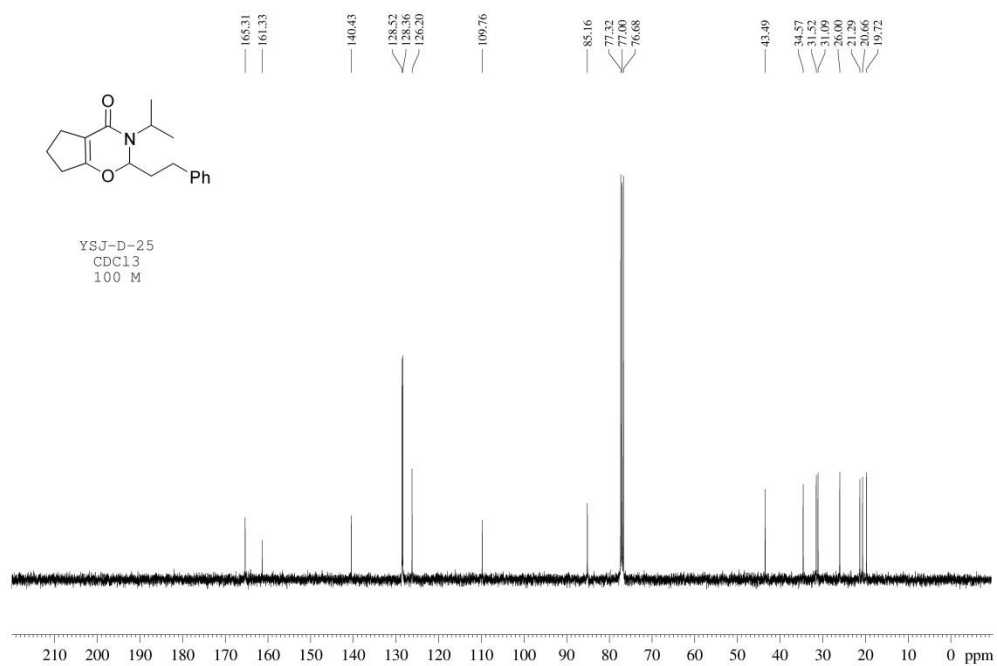



# $^1\text{H}$ and $^{13}\text{C}$ NMR spectra of compound 9a

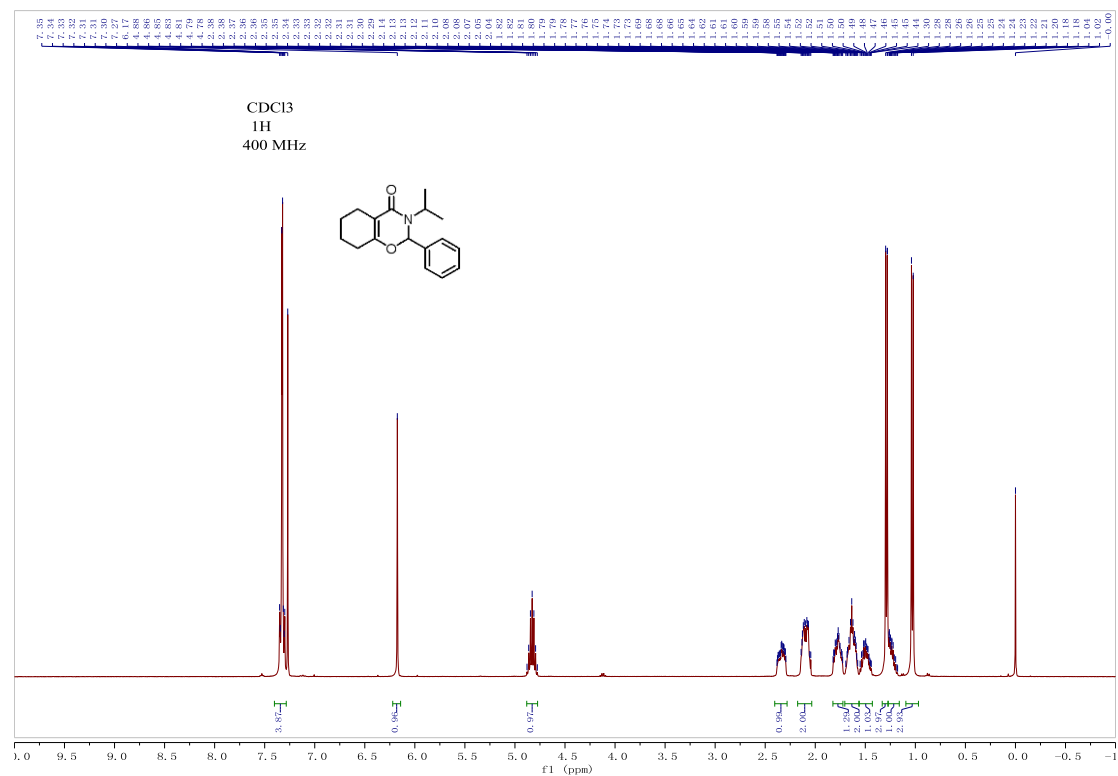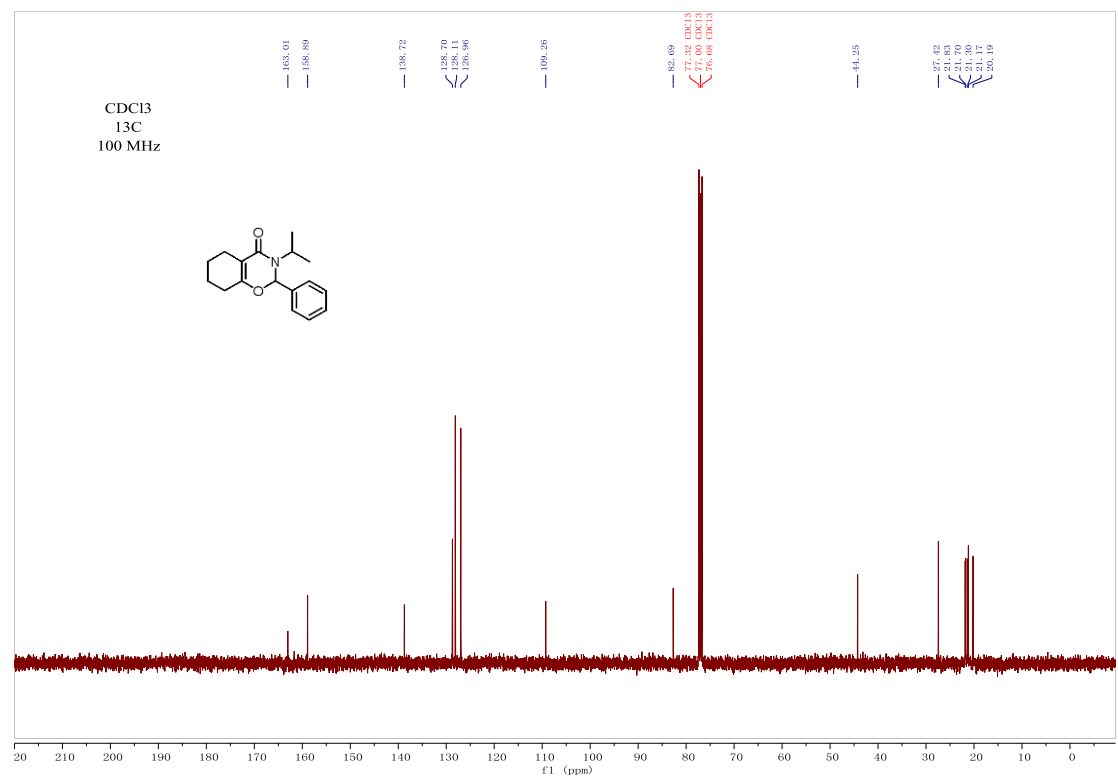

# <sup>1</sup>H and <sup>13</sup>C NMR spectra of compound 9b

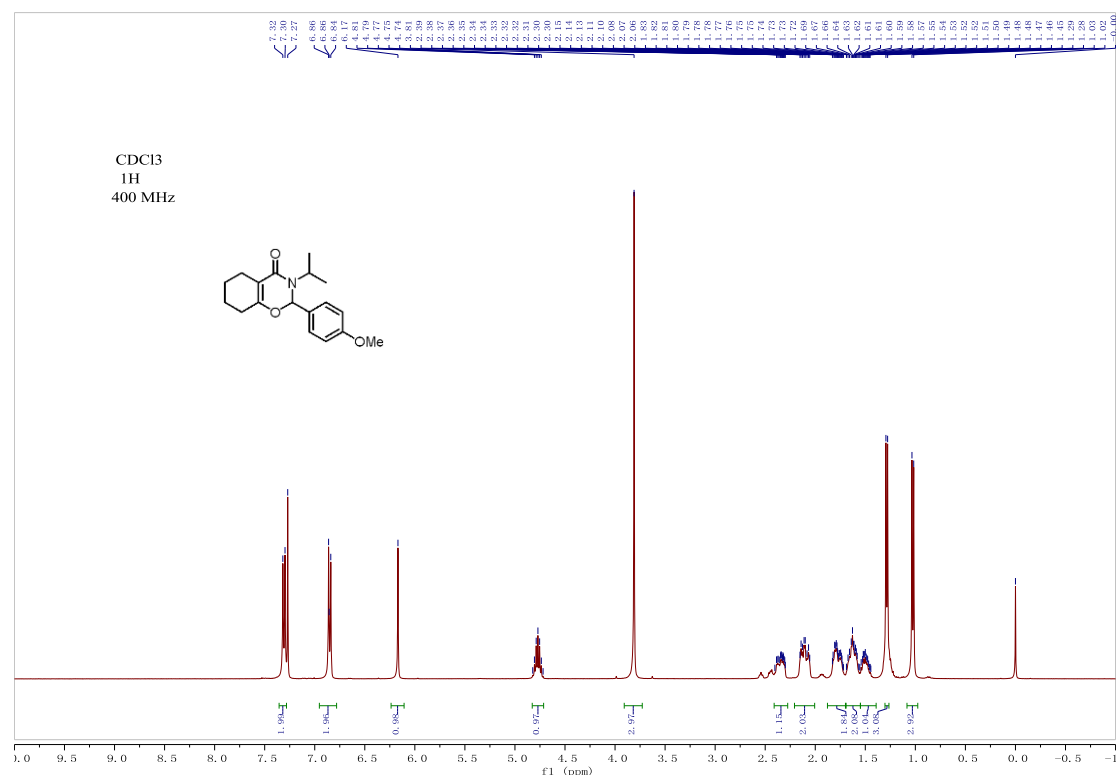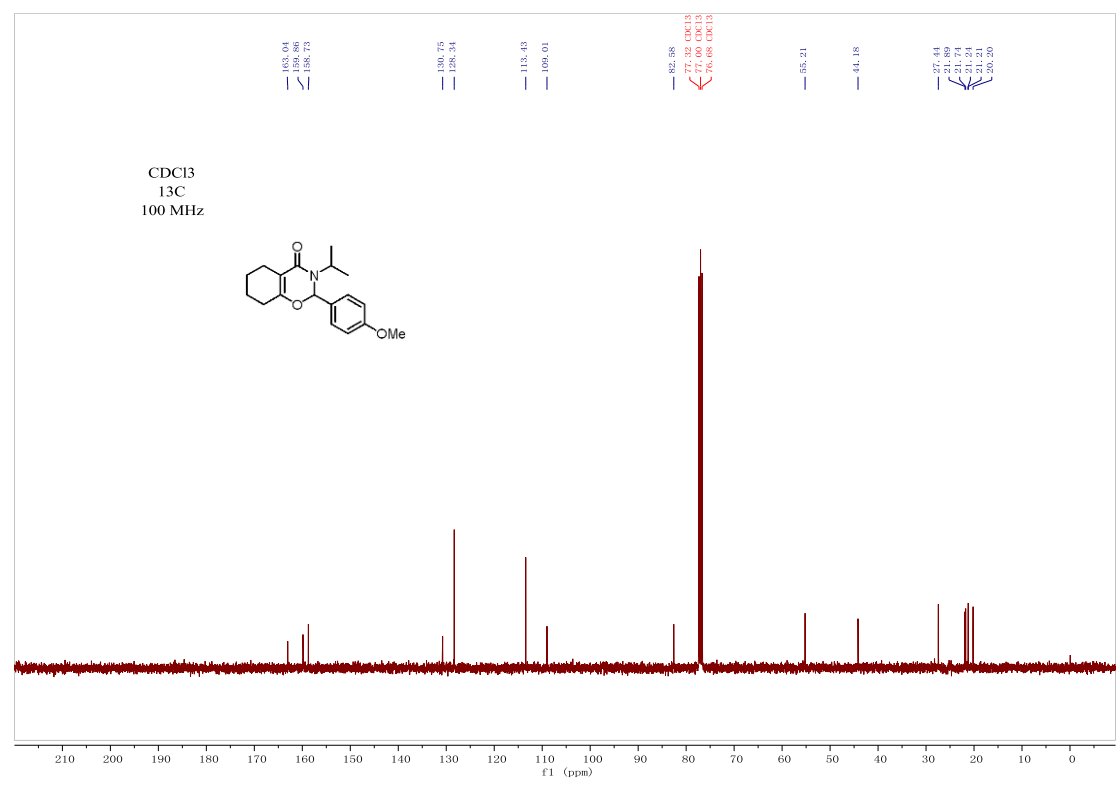







# <sup>1</sup>H and <sup>13</sup>C NMR spectra of compound 9f

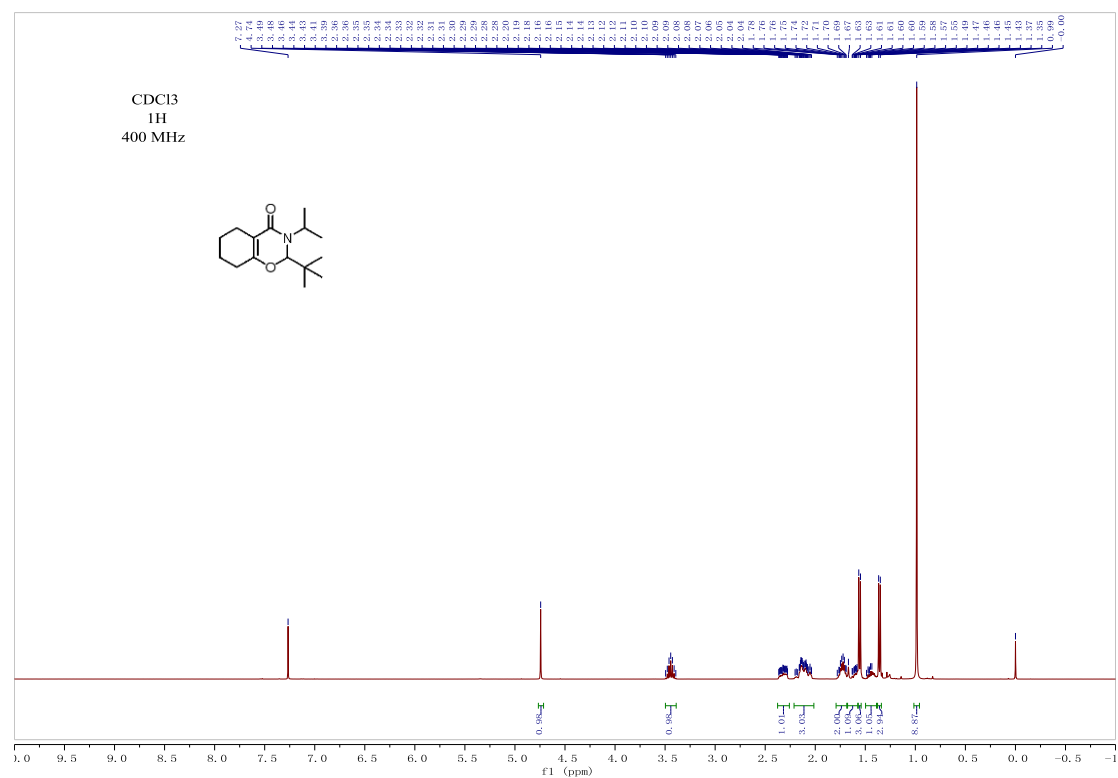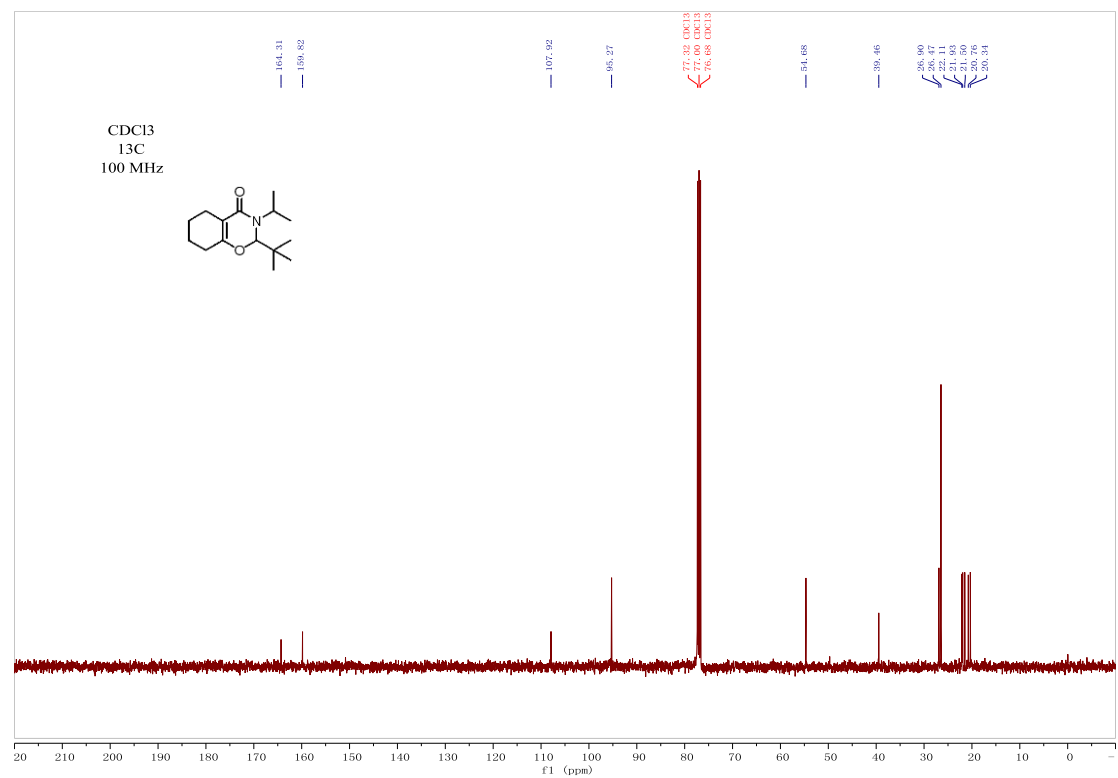

# <sup>1</sup>H and <sup>13</sup>C NMR spectra of compound 9g

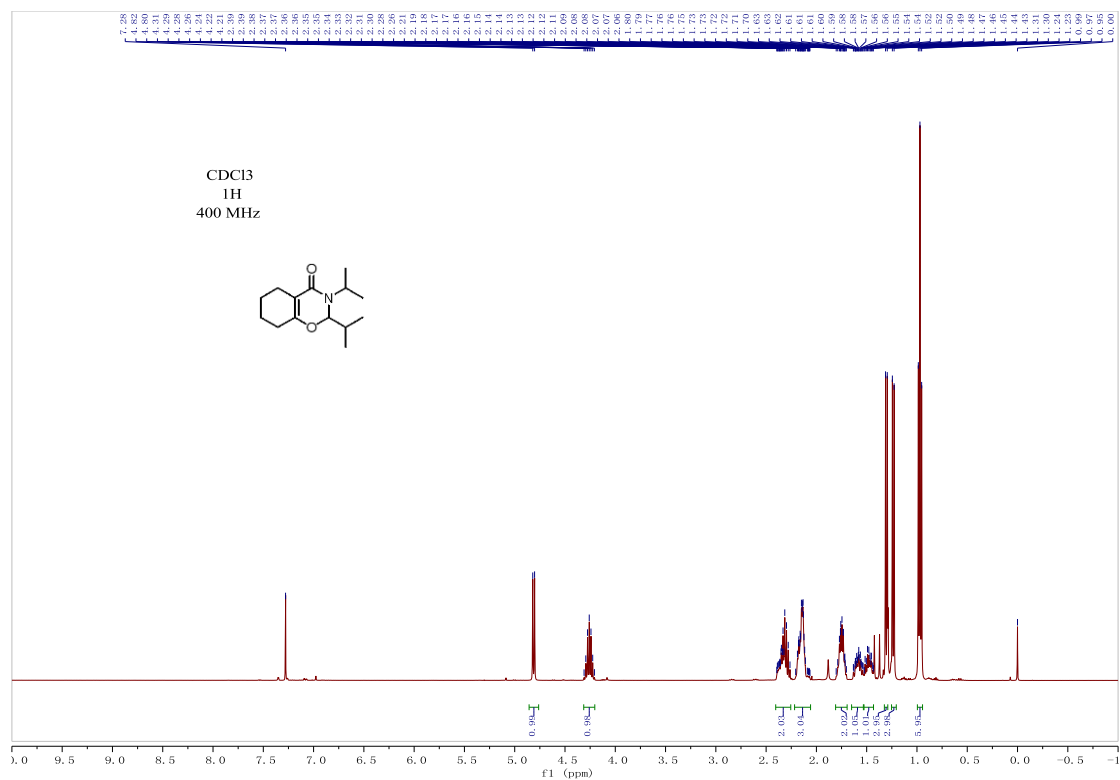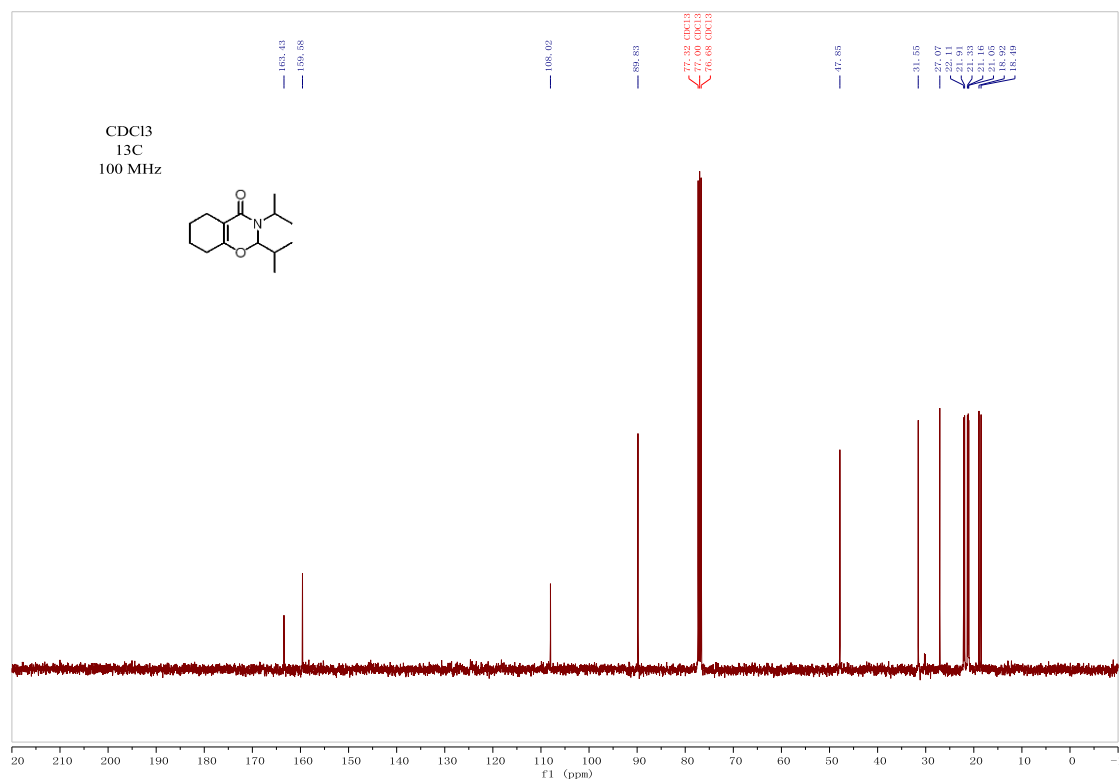

# <sup>1</sup>H and <sup>13</sup>C NMR spectra of compound 9h

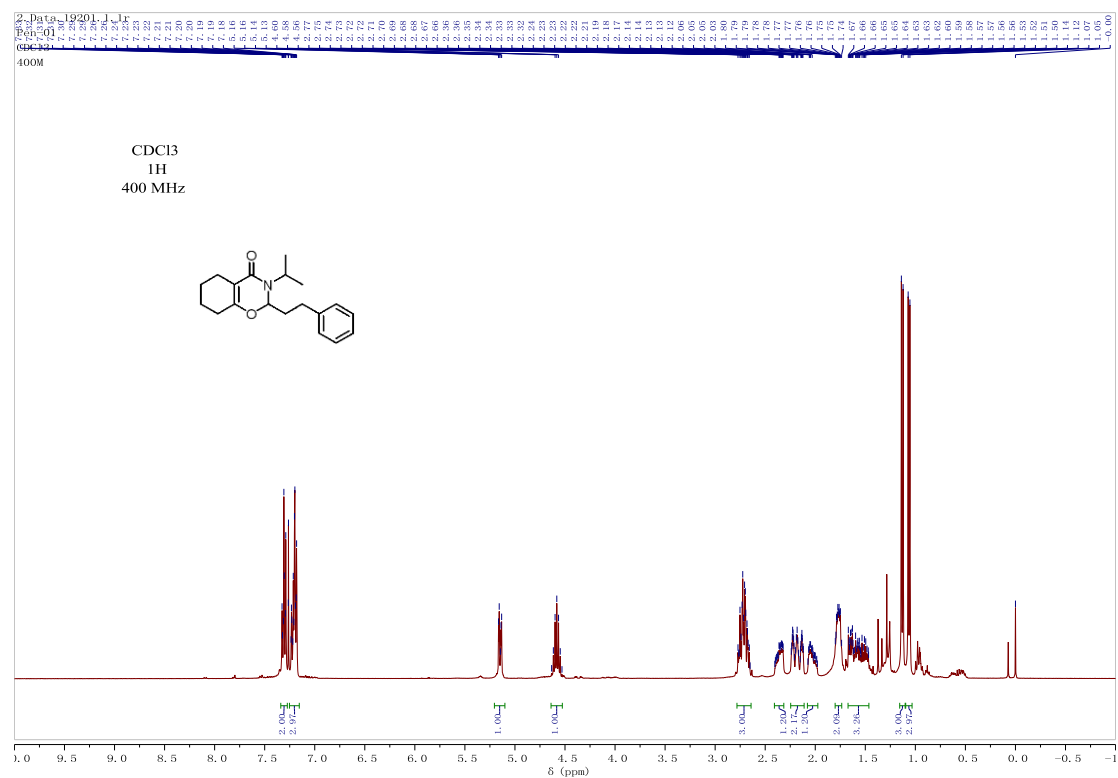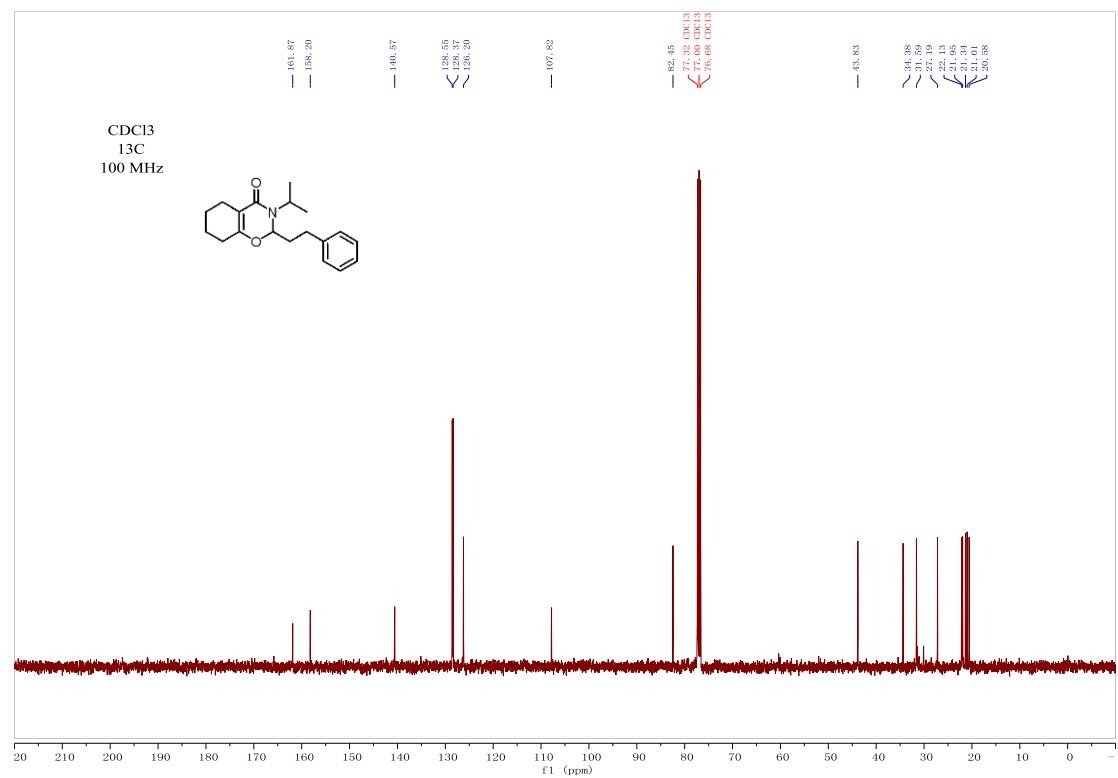



# <sup>1</sup>H and <sup>13</sup>C NMR spectra of compound 9i

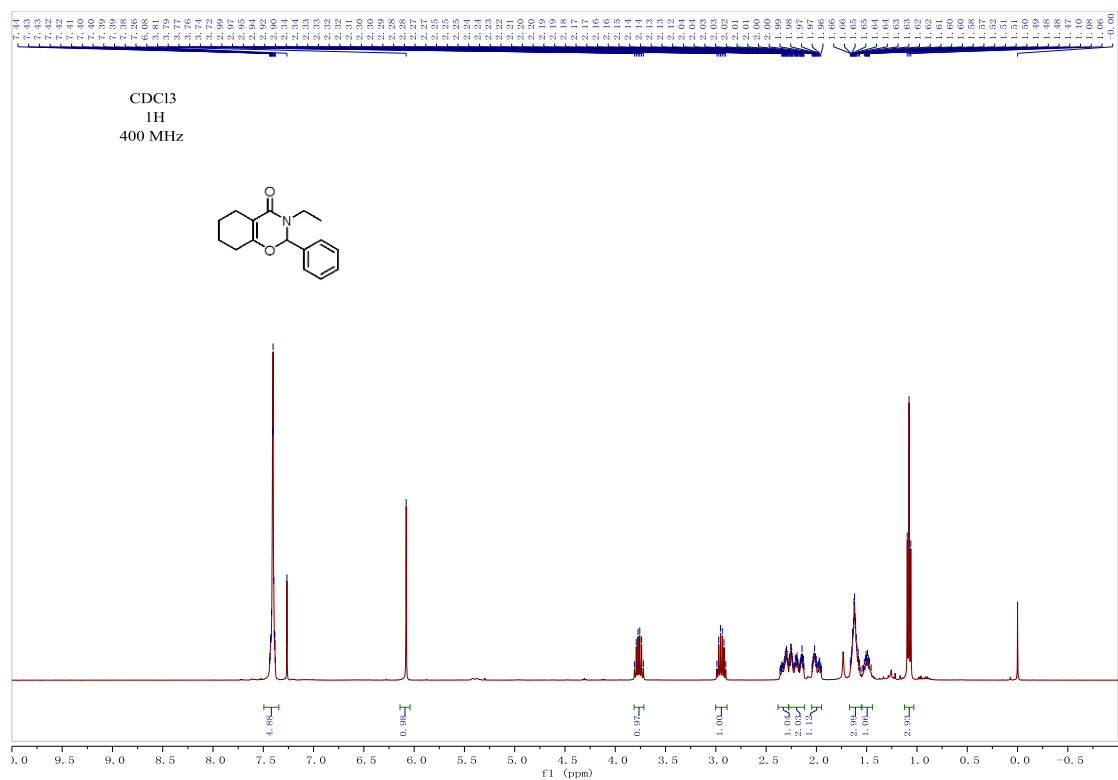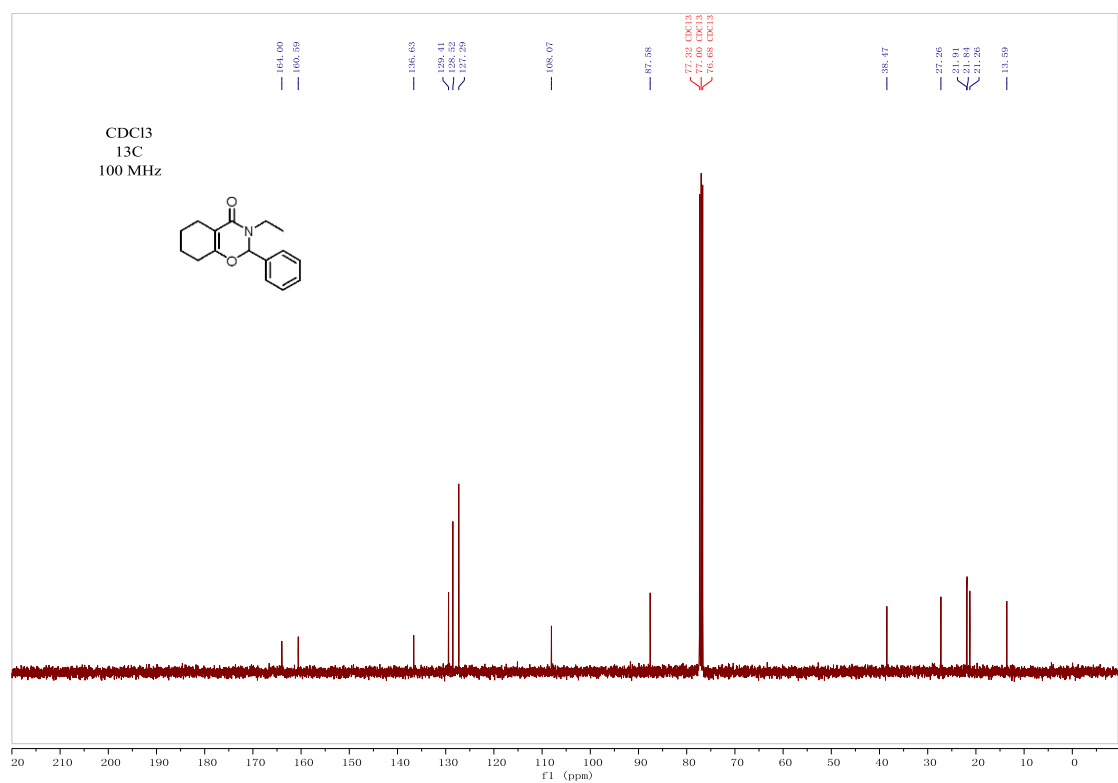

# <sup>1</sup>H and <sup>13</sup>C NMR spectra of compound 9j

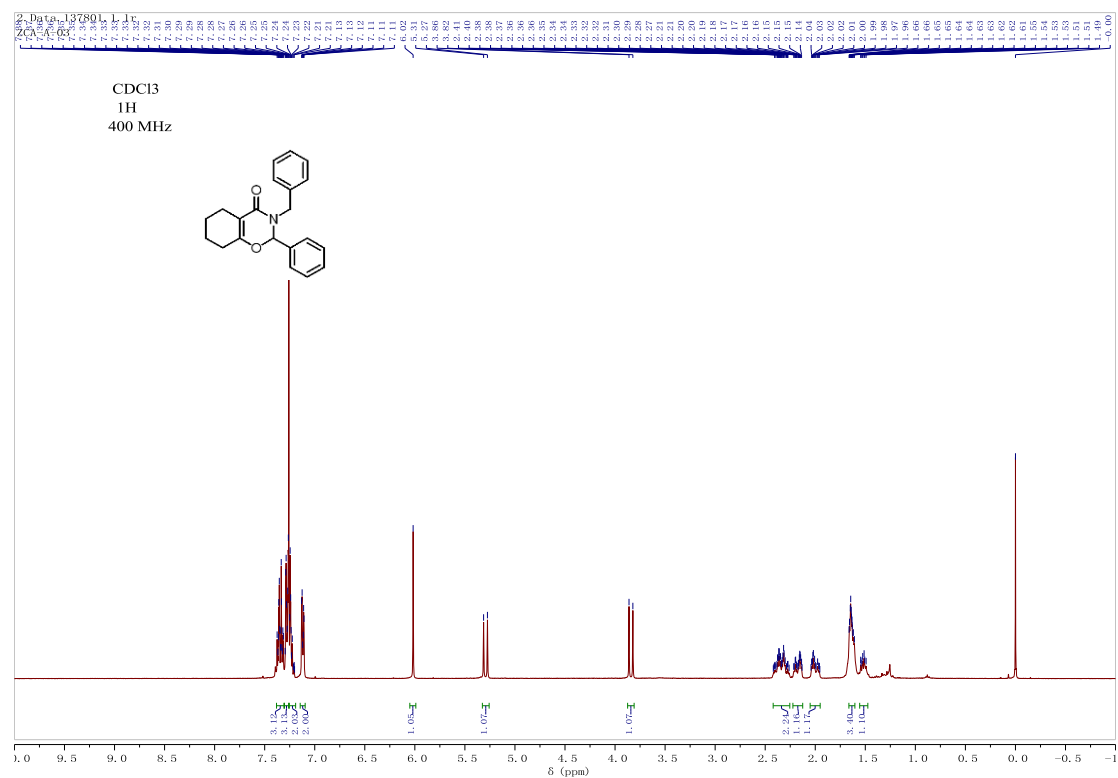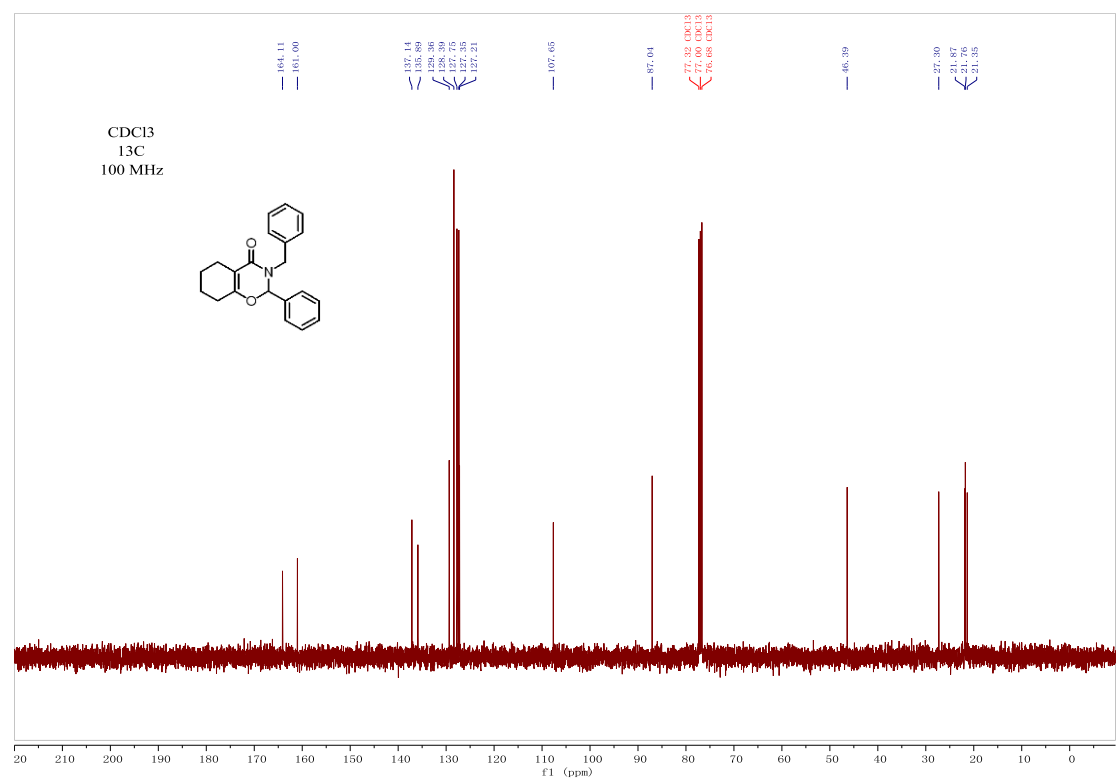

# <sup>1</sup>H and <sup>13</sup>C NMR spectra of compound 9k

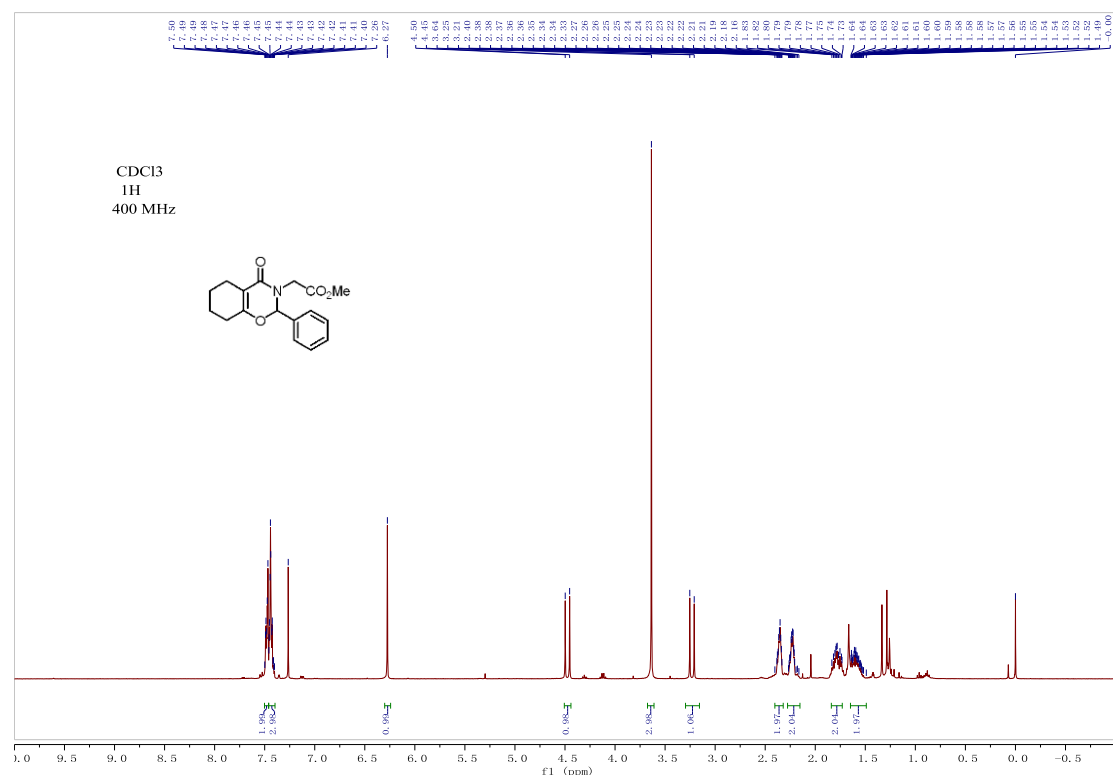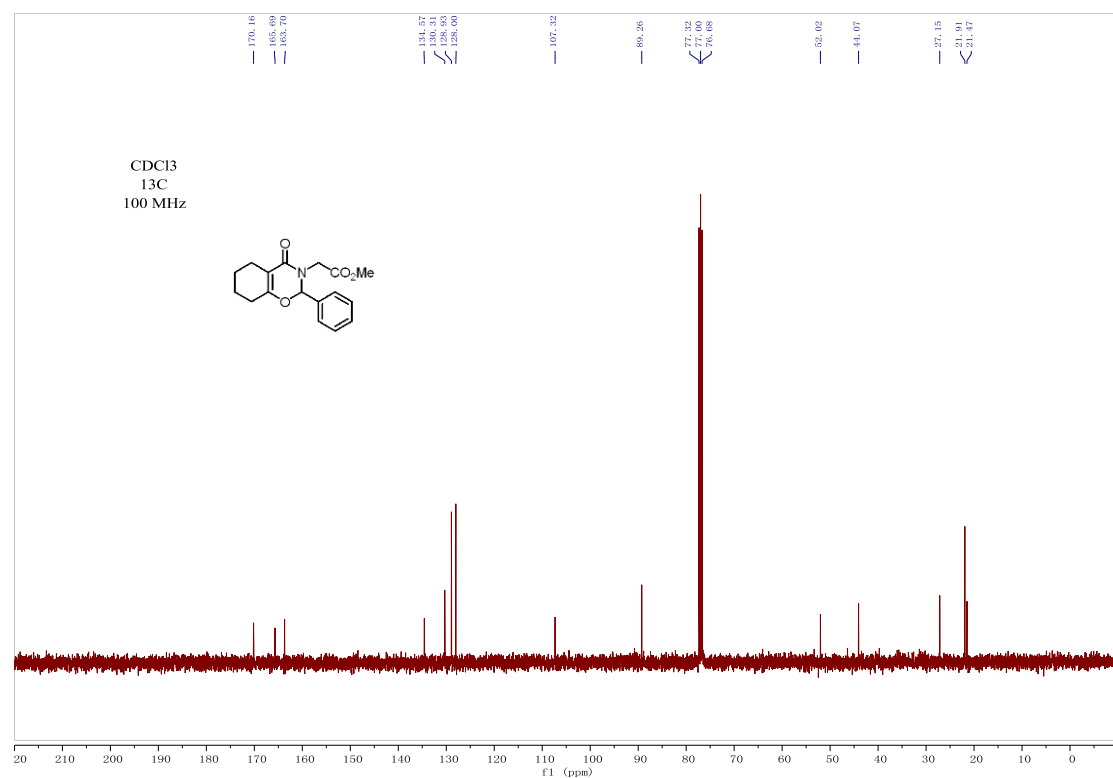



# $^1\text{H}$ and $^{13}\text{C}$ NMR spectra of compound 13a

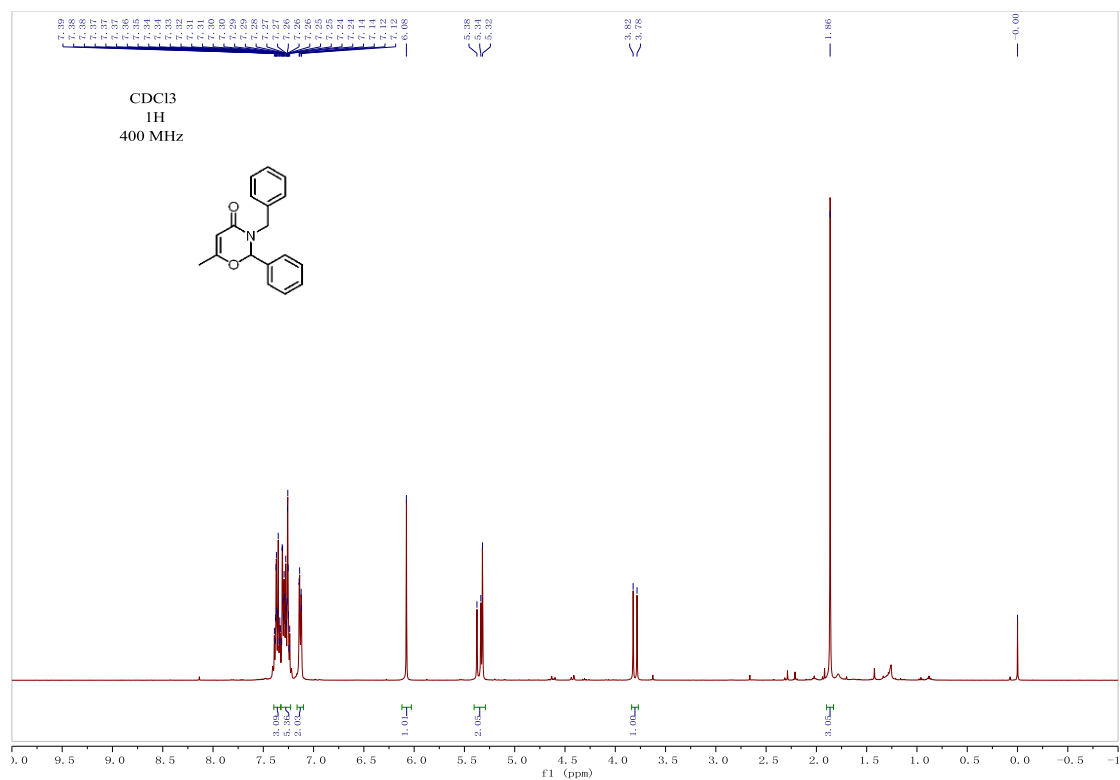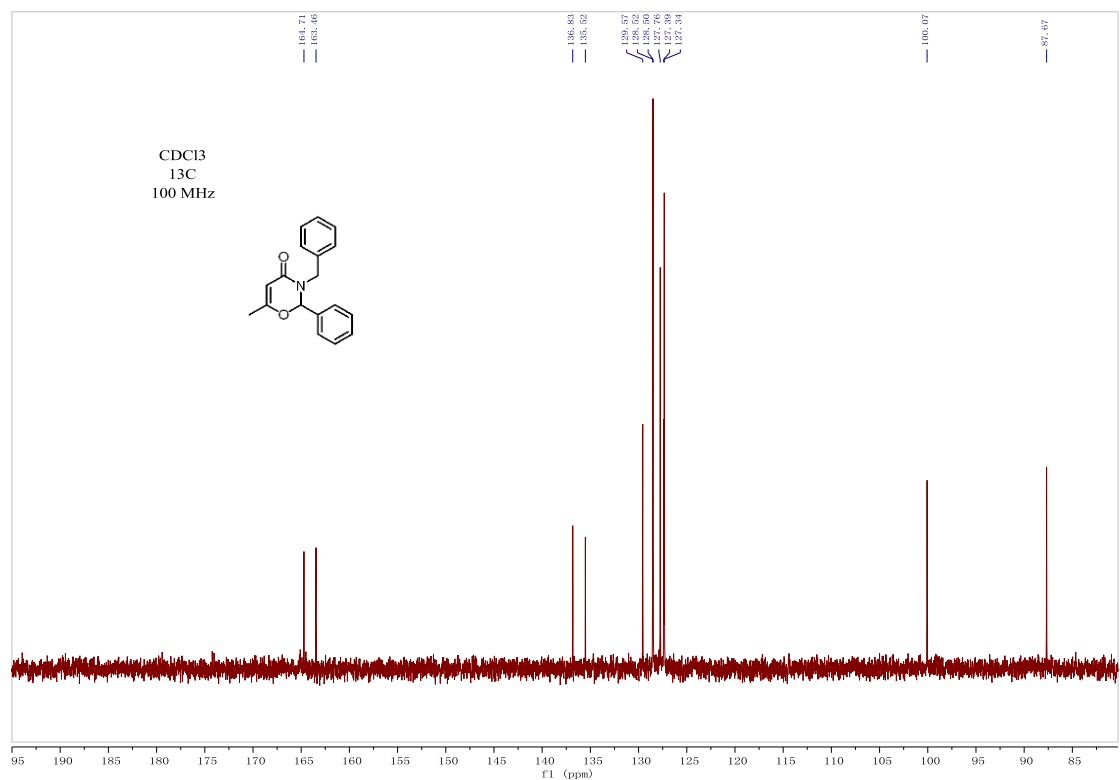

# <sup>1</sup>H and <sup>13</sup>C NMR spectra of compound 13b

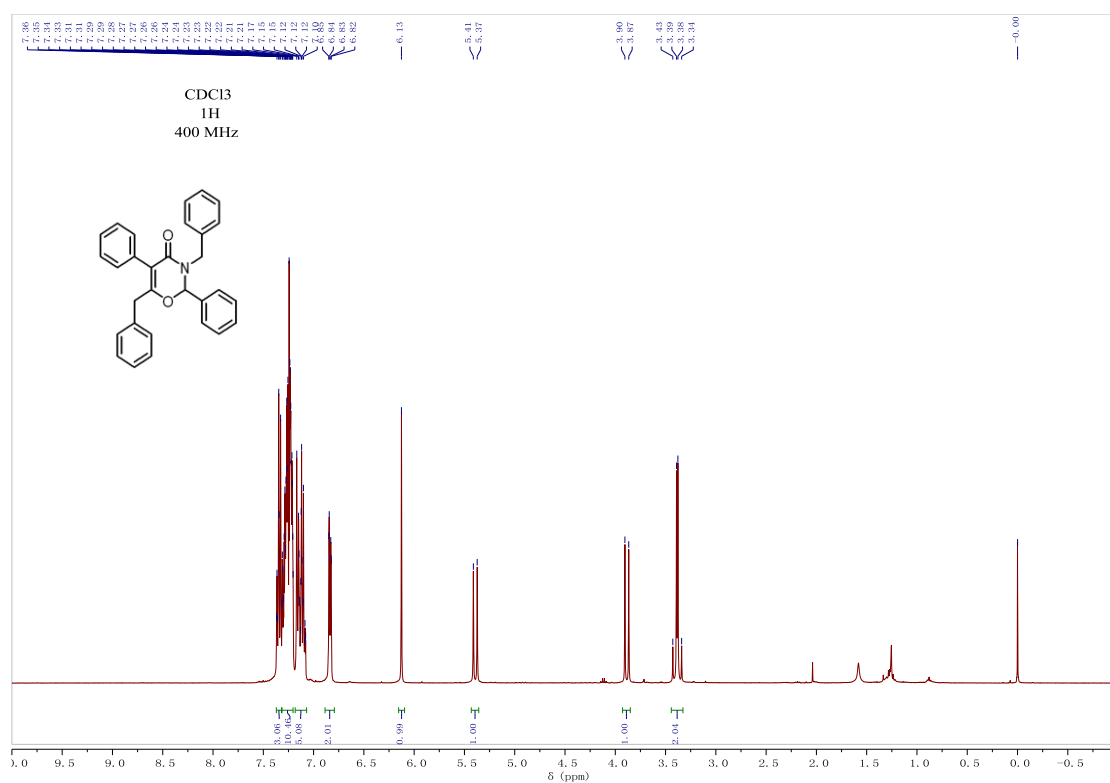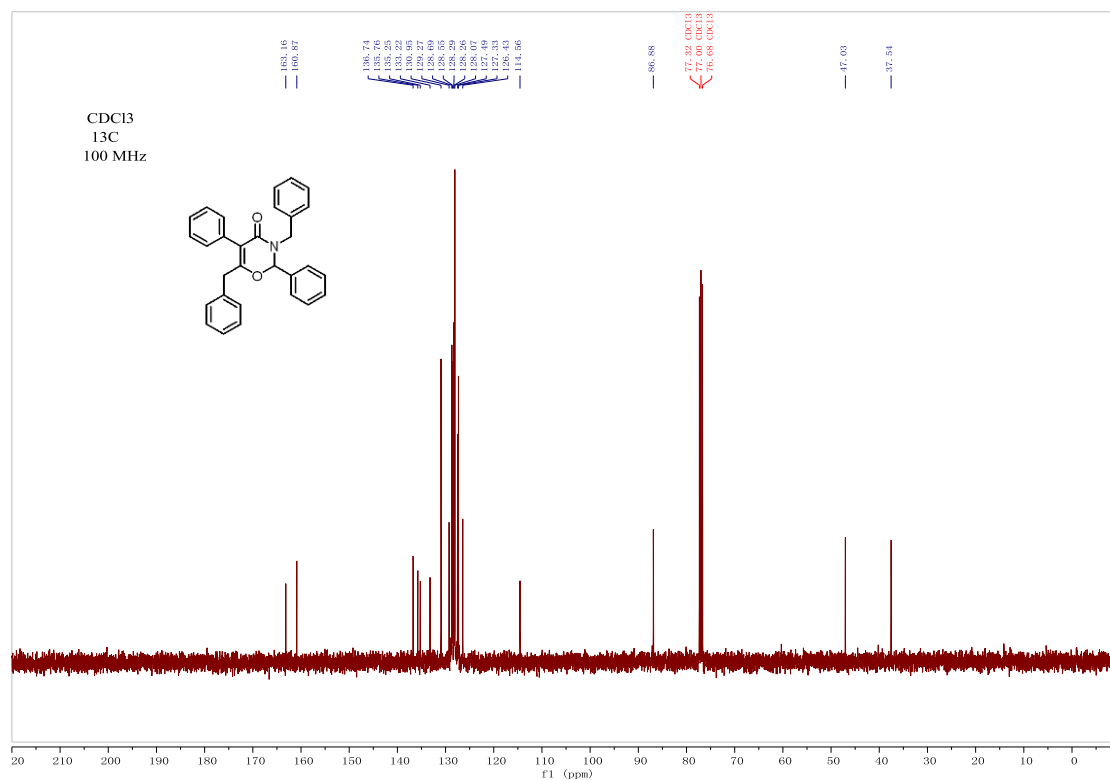

CCDC 2213238-2213241 contain the crystallographic data for compounds **7a**, **7c**, **9a**, **9b**. These data can be obtained free of charge from The Cambridge Crystallographic Data Centre via [www.ccdc.cam.ac.uk/structures](http://www.ccdc.cam.ac.uk/structures).

Single crystals of C<sub>16</sub>H<sub>19</sub>NO<sub>2</sub> [**exp\_3599**, CCDC 2213238] were obtained by slow evaporation of an AcOEt/*n*-hexane solution of **7a**. A suitable crystal was selected and mounted on a XtaLAB Synergy, Dualflex, HyPix diffractometer. The crystal was kept at 100.00(10) K during data collection. Using Olex2<sup>[1]</sup>, the structure was solved with the SHELXT<sup>[2]</sup> structure solution program using Intrinsic Phasing and refined with the SHELXL<sup>[3]</sup> refinement package using Least Squares minimisation.

Crystal Data for C<sub>16</sub>H<sub>19</sub>NO<sub>2</sub> [**exp\_3599**, CCDC 2213238] (*M* = 257.32 g/mol): monoclinic, space group P2<sub>1</sub>/c (no. 14), *a* = 7.96412(10) Å, *b* = 13.49912(14) Å, *c* = 12.50563(16) Å, *β* = 103.1964(13)°, *V* = 1308.96(3) Å<sup>3</sup>, *Z* = 4, *T* = 100.00(10) K, *μ*(Cu Kα) = 0.682 mm<sup>-1</sup>, *D*<sub>calc</sub> = 1.306 g/cm<sup>3</sup>, 12781 reflections measured (9.782° ≤ 2θ ≤ 143.514°), 2487 unique (*R*<sub>int</sub> = 0.0290, *R*<sub>sigma</sub> = 0.0207) which were used in all calculations. The final *R*<sub>1</sub> was 0.0339 (*I* > 2σ(*I*)) and *wR*<sub>2</sub> was 0.0866 (all data).

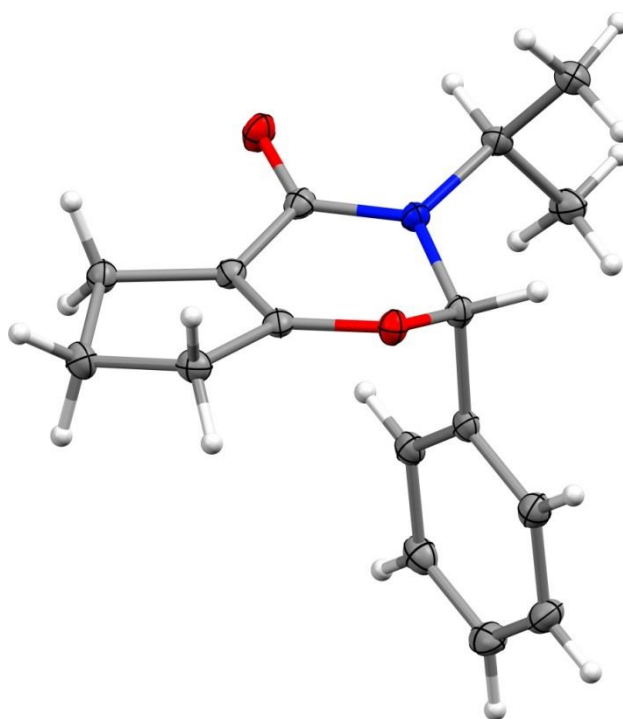

**Figure S1.** The single crystal X-ray structure of compound **7a** [CCDC 2213238]. Thermal ellipsoids are drawn at the 50% probability level.

Single crystals of C<sub>19</sub>H<sub>23</sub>NO<sub>2</sub> [**exp\_3588**, **CCDC 2213239**] were obtained by slow evaporation of an AcOEt/*n*-hexane solution of **7c**. A suitable crystal was selected and mounted on a XtaLAB Synergy, Dualflex, HyPix diffractometer. The crystal was kept at 100.00(10) K during data collection. Using Olex2<sup>[1]</sup>, the structure was solved with the SHELXT<sup>[2]</sup> structure solution program using Intrinsic Phasing and refined with the SHELXL<sup>[3]</sup> refinement package using Least Squares minimisation.

Crystal Data for C<sub>19</sub>H<sub>23</sub>NO<sub>2</sub> [**exp\_3588**, **CCDC 2213239**] (*M* = 297.38 g/mol): monoclinic, space group P2<sub>1</sub>/c (no. 14), *a* = 15.8861(2) Å, *b* = 9.81570(10) Å, *c* = 10.53650(10) Å, β = 105.7530(10)°, *V* = 1581.28(3) Å<sup>3</sup>, *Z* = 4, *T* = 100.00(10) K, μ(Cu Kα) = 0.633 mm<sup>-1</sup>, *D*<sub>calc</sub> = 1.249 g/cm<sup>3</sup>, 15471 reflections measured (5.78° ≤ 2θ ≤ 143.644°), 3038 unique (*R*<sub>int</sub> = 0.0460, *R*<sub>sigma</sub> = 0.0300) which were used in all calculations. The final *R*<sub>1</sub> was 0.0429 (*I* > 2σ(*I*)) and *wR*<sub>2</sub> was 0.1118 (all data).

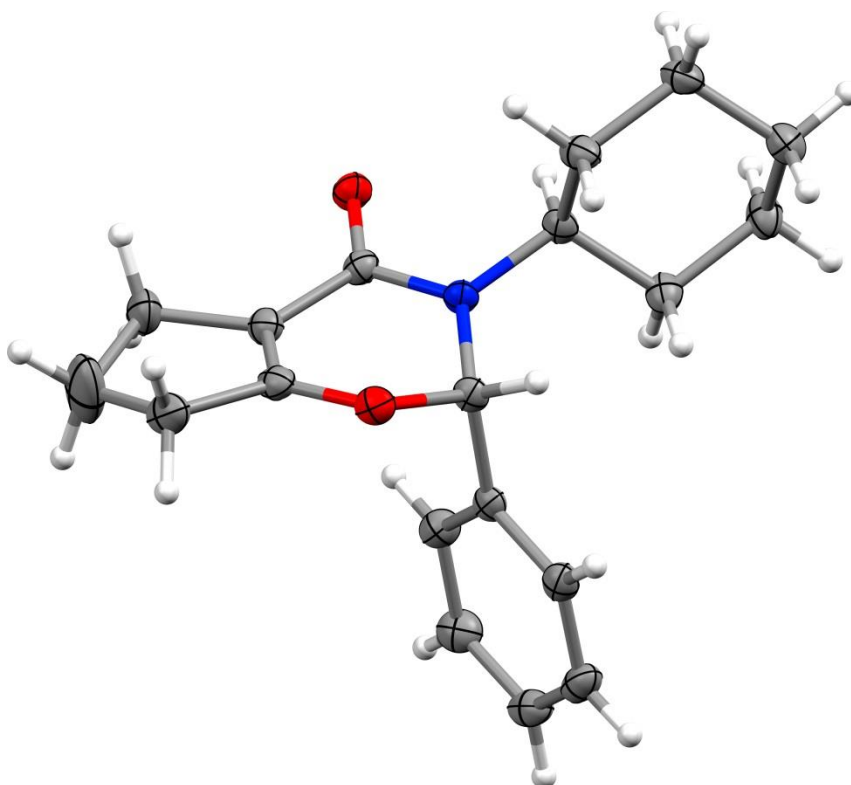

**Figure S2.** The single crystal X-ray structure of compound **7c** [**CCDC 2213239**]. Thermal ellipsoids are drawn at the 50% probability level.



Single crystals of  $C_{17}H_{21}NO_2$  [**exp\_1468\_1**, **CCDC 2213240**] were obtained by slow evaporation of a dichloromethane/petroleum ether solution of **9a**. A suitable crystal was selected and mounted on a SuperNova, Dual, Cu at home/near, Atlas diffractometer. The crystal was kept at 100.00(10) K during data collection. Using Olex2<sup>[1]</sup>, the structure was solved with the SHELXT<sup>[2]</sup> structure solution program using Intrinsic Phasing and refined with the SHELXL<sup>[3]</sup> refinement package using Least Squares minimisation.

Crystal Data for  $C_{17}H_{21}NO_2$  [**exp\_1468\_1**, **CCDC 2213240**] ( $M = 271.362$  g/mol): orthorhombic, space group *Pbca* (no. 61),  $a = 9.91528(16)$  Å,  $b = 10.40381(18)$  Å,  $c = 28.3425(4)$  Å,  $V = 2923.71(8)$  Å<sup>3</sup>,  $Z = 8$ ,  $T = 100.00(10)$  K,  $\mu(\text{Cu K}\alpha) = 0.636$  mm<sup>-1</sup>,  $D_{\text{calc}} = 1.233$  g/cm<sup>3</sup>, 7062 reflections measured ( $10.9^\circ \leq 2\theta \leq 146.7^\circ$ ), 2852 unique ( $R_{\text{int}} = 0.0240$ ,  $R_{\text{sigma}} = 0.0252$ ) which were used in all calculations. The final  $R_1$  was 0.0381 ( $I \geq 2u(I)$ ) and  $wR_2$  was 0.1023 (all data).

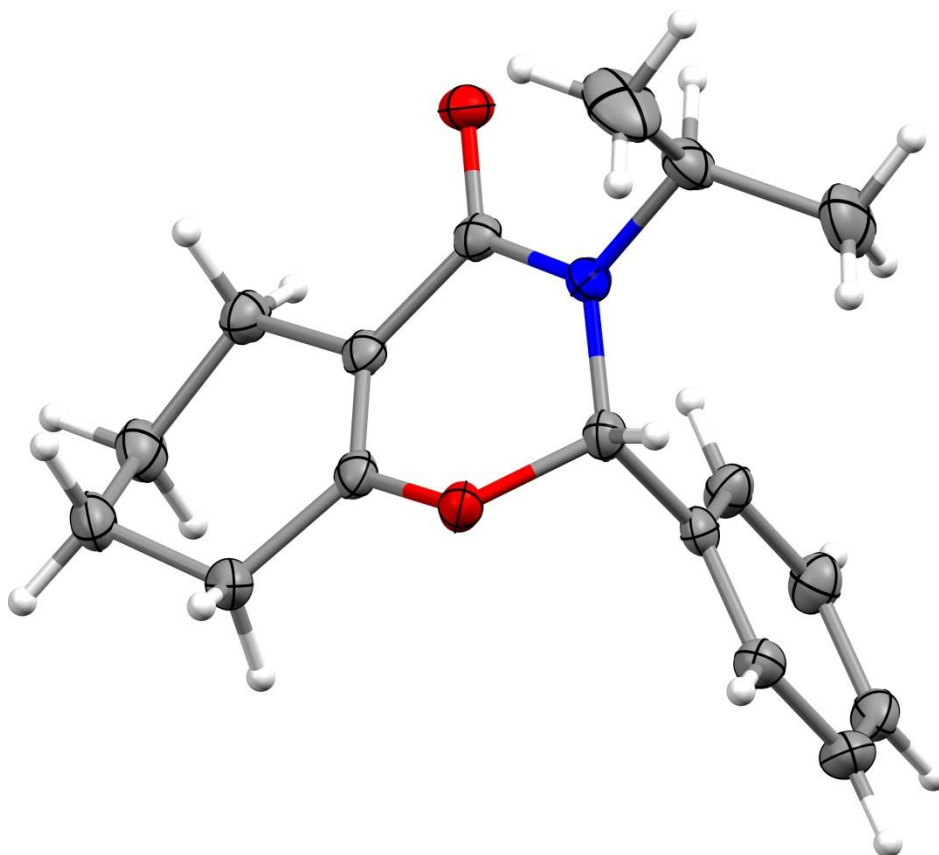

**Figure S3.** The single crystal X-ray structure of compound **9a** [**CCDC 2213240**]. Thermal ellipsoids are drawn at the 50% probability level.

Single crystals of  $C_{18}H_{23}NO_3$  [**exp\_1495\_1**, **CCDC 2213241**] were obtained by slow evaporation of a dichloromethane/petroleum ether solution of **9b**. A suitable crystal was selected and mounted on a SuperNova, Dual, Cu at home/near, Atlas diffractometer. The crystal was kept at 293 K during data collection. Using Olex2<sup>[1]</sup>, the structure was solved with the SHELXT<sup>[2]</sup> structure solution program using Intrinsic Phasing and refined with the SHELXL<sup>[3]</sup> refinement package using Least Squares minimisation.

Crystal Data for  $C_{18}H_{23}NO_3$  [**exp\_1495\_1**, **CCDC 2213241**] ( $M = 301.37$  g/mol): monoclinic, space group  $C2/c$  (no. 15),  $a = 15.7240(3)$  Å,  $b = 12.93561(17)$  Å,  $c = 17.1001(3)$  Å,  $\beta = 110.2436(19)^\circ$ ,  $V = 3263.31(9)$  Å<sup>3</sup>,  $Z = 8$ ,  $T = 293$  K,  $\mu(\text{Cu K}\alpha) = 0.666$  mm<sup>-1</sup>,  $D_{\text{calc}} = 1.227$  g/cm<sup>3</sup>, 6163 reflections measured ( $9.092^\circ \leq 2\theta \leq 147.596^\circ$ ), 3209 unique ( $R_{\text{int}} = 0.0117$ ,  $R_{\text{sigma}} = 0.0141$ ) which were used in all calculations. The final  $R_1$  was 0.0450 ( $I > 2\sigma(I)$ ) and  $wR_2$  was 0.1374 (all data).

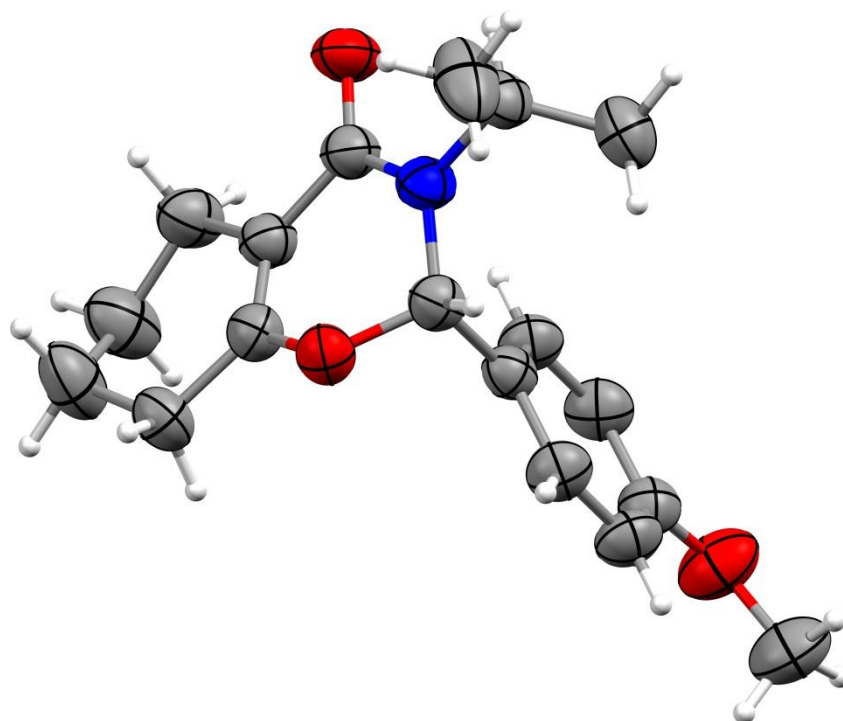

**Figure S4.** The single crystal X-ray structure of compound **9b** [**CCDC 2213241**]. Thermal ellipsoids are drawn at the 50% probability level.

1. Dolomanov, O.V., Bourhis, L.J., Gildea, R.J, Howard, J.A.K. & Puschmann, H. (2009), *J. Appl. Cryst.* 42, 339-341.
2. Sheldrick, G.M. (2015). *Acta Cryst.* A71, 3-8.
3. Sheldrick, G.M. (2015). *Acta Cryst.* C71, 3-8.
